# Supplementary material for: New fluoroethyl phenylalanine analogues as potential LAT1-targeting PET tracers for glioblastoma
Source: PubMed Central journal article supplement (PMC6393465; doi:10.1038/s41598-019-40013-x), 2019-02-27
Supplement: 41598_2019_40013_MOESM1_ESM.pdf [file 41598_2019_40013_MOESM1_ESM.pdf]

## Supporting information

# New fluoroethyl phenylalanine analogues as potential LAT-1 targeting PET tracers for glioblastoma

Jeroen Verhoeven<sup>1</sup>, Fabian Hulpia<sup>2</sup>, Ken Kersemans<sup>3</sup>, Julie Bolcaen<sup>3</sup>, Stef De Lombaerde<sup>1</sup>, Jan Goeman<sup>4</sup>, Benedicte Descamps<sup>5</sup>, Giorgio Hallaert<sup>6</sup>, Caroline Van den Broecke<sup>7</sup>, Karel Deblaere<sup>8</sup>, Christian Vanhove<sup>5</sup>, Johan Van der Eycken<sup>4</sup>, Serge Van Calenbergh<sup>2</sup>, Ingeborg Goethals<sup>3</sup> & Filip De Vos<sup>1</sup>

<sup>1</sup>Laboratory of Radiopharmacy, Ghent University, Ghent, Belgium.

<sup>2</sup>Laboratory for Medicinal Chemistry, Ghent University, Ghent, Belgium.

<sup>3</sup>Ghent University Hospital, Department of Nuclear Medicine, Ghent, Belgium.

<sup>4</sup>Laboratory for Organic and Bio-organic synthesis, Ghent University, Ghent, Belgium.

<sup>5</sup>iMinds-IBiTech-MEDISIP Ghent University, Department of Electronics and Information Systems, Ghent, Belgium.

<sup>6</sup>Ghent University Hospital, Department of Neurosurgery, Ghent, Belgium.

<sup>7</sup>Ghent University Hospital, Department of Pathology, Ghent, Belgium.

<sup>8</sup>Ghent University Hospital, Department of Radiology and Medical Imaging, Ghent, Belgium.

**\*First author and responsible for correspondence:**

Jeroen Verhoeven

Email: [Jeroen.Verhoeven@ugent.be](mailto:Jeroen.Verhoeven@ugent.be)

## Table of contents

|                                                                                                |             |
|------------------------------------------------------------------------------------------------|-------------|
| Chiral purity analysis of compound <b>3 &amp; 4</b>                                            | <b>S-5</b>  |
| Optimization of chromatographic conditions mixture of compound <b>3 &amp; 4</b>                | <b>S-6</b>  |
| Chiral HPLC analysis of compound <b>3</b>                                                      | <b>S-7</b>  |
| Chiral HPLC analysis of compound <b>4</b>                                                      | <b>S-9</b>  |
| Chiral purity analysis of compound <b>9 &amp; 10</b>                                           | <b>S-12</b> |
| Optimization of chromatographic conditions mixture of compound <b>9 &amp; 10</b>               | <b>S-13</b> |
| Chiral HPLC analysis of compound <b>9</b>                                                      | <b>S-14</b> |
| Chiral HPLC analysis of compound <b>10</b>                                                     | <b>S-17</b> |
| Chiral purity analysis of compound <b>15 &amp; 16</b>                                          | <b>S-20</b> |
| Optimization of capillary electrophoresis (CE) analysis mixture of compound <b>15 &amp; 16</b> | <b>S-21</b> |
| Chiral CE analysis of compound <b>15</b>                                                       | <b>S-23</b> |
| Chiral CE analysis of compound <b>16</b>                                                       | <b>S-26</b> |
| Chiral purity analysis of compound <b>17 &amp; 18</b>                                          | <b>S-29</b> |
| Optimization of capillary electrophoresis (CE) analysis mixture of compound <b>17 &amp; 18</b> | <b>S-30</b> |
| Chiral CE analysis of compound <b>17</b>                                                       | <b>S-32</b> |
| Chiral CE analysis of compound <b>18</b>                                                       | <b>S-35</b> |
| Chiral purity analysis of compound <b>32 &amp; 33</b>                                          | <b>S-38</b> |
| Optimization of chromatographic conditions mixture of compound <b>32 &amp; 33</b>              | <b>S-39</b> |

|                                                                                                                                   |             |
|-----------------------------------------------------------------------------------------------------------------------------------|-------------|
| Chiral HPLC analysis of compound <b>32</b>                                                                                        | <b>S-40</b> |
| Chiral HPLC analysis of compound <b>33</b>                                                                                        | <b>S-42</b> |
| Radiosynthesis of compound [ <sup>18</sup> F]- <b>32</b> (2-[ <sup>18</sup> F]-FELP): Flow scheme of the custom Synthra RN Module | <b>S-44</b> |
| Semi-preparative radiogram of [ <sup>18</sup> F]- <b>32</b> (2-[ <sup>18</sup> F]-FELP)                                           | <b>S-45</b> |
| Semi-preparative UV-chromatogram of [ <sup>18</sup> F]- <b>32</b> (2-[ <sup>18</sup> F]-FELP)                                     | <b>S-46</b> |
| Chiral purity analysis of radiolabeled <b>32</b> (2-[ <sup>18</sup> F]-FELP)                                                      | <b>S-47</b> |
| Chiral HPLC analysis of radiolabeled <b>32</b> (2-[ <sup>18</sup> F]-FELP)                                                        | <b>S-48</b> |
| Flow cytometry analysis                                                                                                           | <b>S-49</b> |
| Michaelis-Menten plots                                                                                                            | <b>S-50</b> |

## Chiral purity analysis of compound **3** & **4**

Chromatographic conditions for **3** & **4**:

Diacel Chiralpak IA, 250 x 4.6 mm, particle size 5  $\mu\text{m}$ . Column temperature was set at 35  $^{\circ}\text{C}$ . The chromatographic run was performed isocratically with a mixture of *n*-Hexane/EtOH(abs.) (97/3) and a run length of 30 at a flow rate of 1 mL/min.

Injection Date : 12/20/2017 5:45:35 PM      Seq. Line : 14  
 Sample Name : G      Location : Vial 7  
 Acq. Operator : Jan Goeman      Inj : 1  
                                          Inj Volume : Inj prog

Sequence File : C:\HPCHEM\2\SEQUENCE\TEMP2.S  
 Method : C:\HPCHEM\2\METHODS\AB97-3.M  
 Last changed : 4/11/2016 11:58:26 AM by Jan Goeman  
 Chirale kolom .....  
 30' isocratisch n-Hexaan-EtOH 97:3

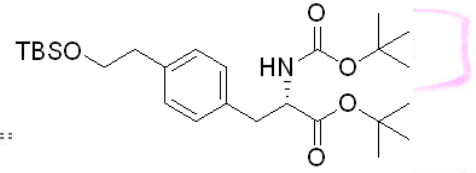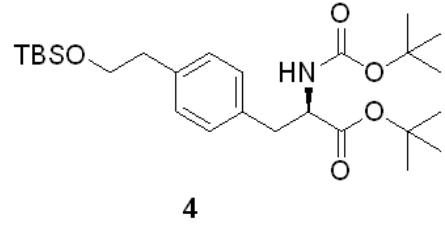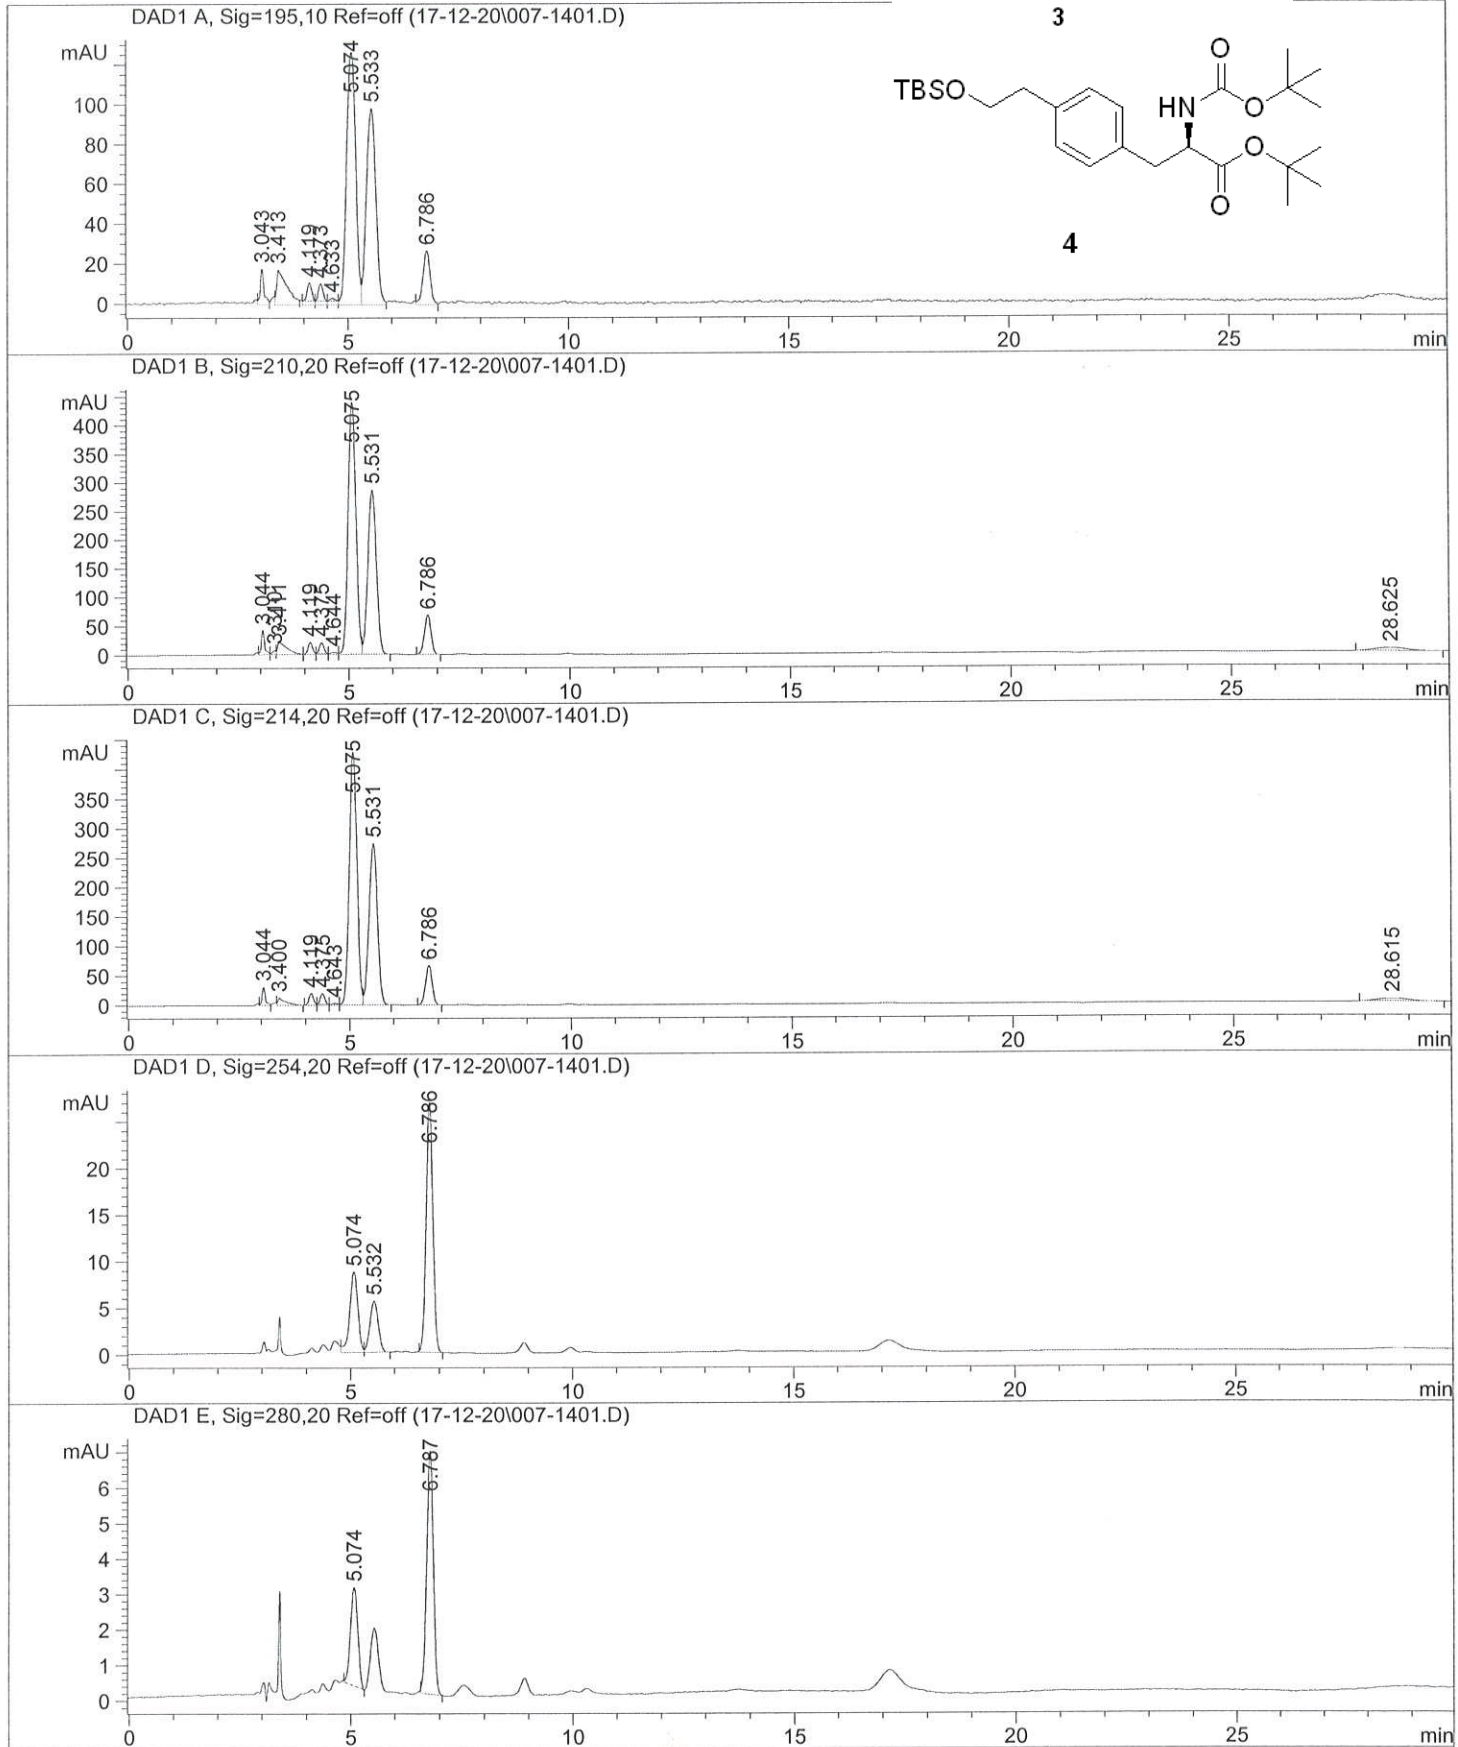

Injection Date : 1/30/2018 7:16:41 PM      Seq. Line : 2  
 Sample Name : 13      Location : Vial 75  
 Acq. Operator : Jan Goeman      Inj : 1  
                                          Inj Volume : Inj prog

Chiral HPLC analysis  
 Sample: cpd. 3

Sequence File : C:\HPCHEM\2\SEQUENCE\TEMP2.S  
 Method : C:\HPCHEM\2\METHODS\AB97-3.M  
 Last changed : 4/11/2016 11:58:26 AM by Jan Goeman  
 Chirale kolom .....  
 30' isocratisch n-Hexaan-EtOH 97:3

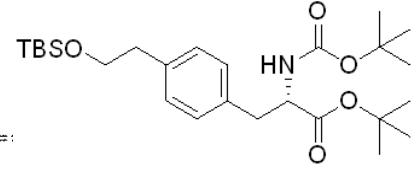

3

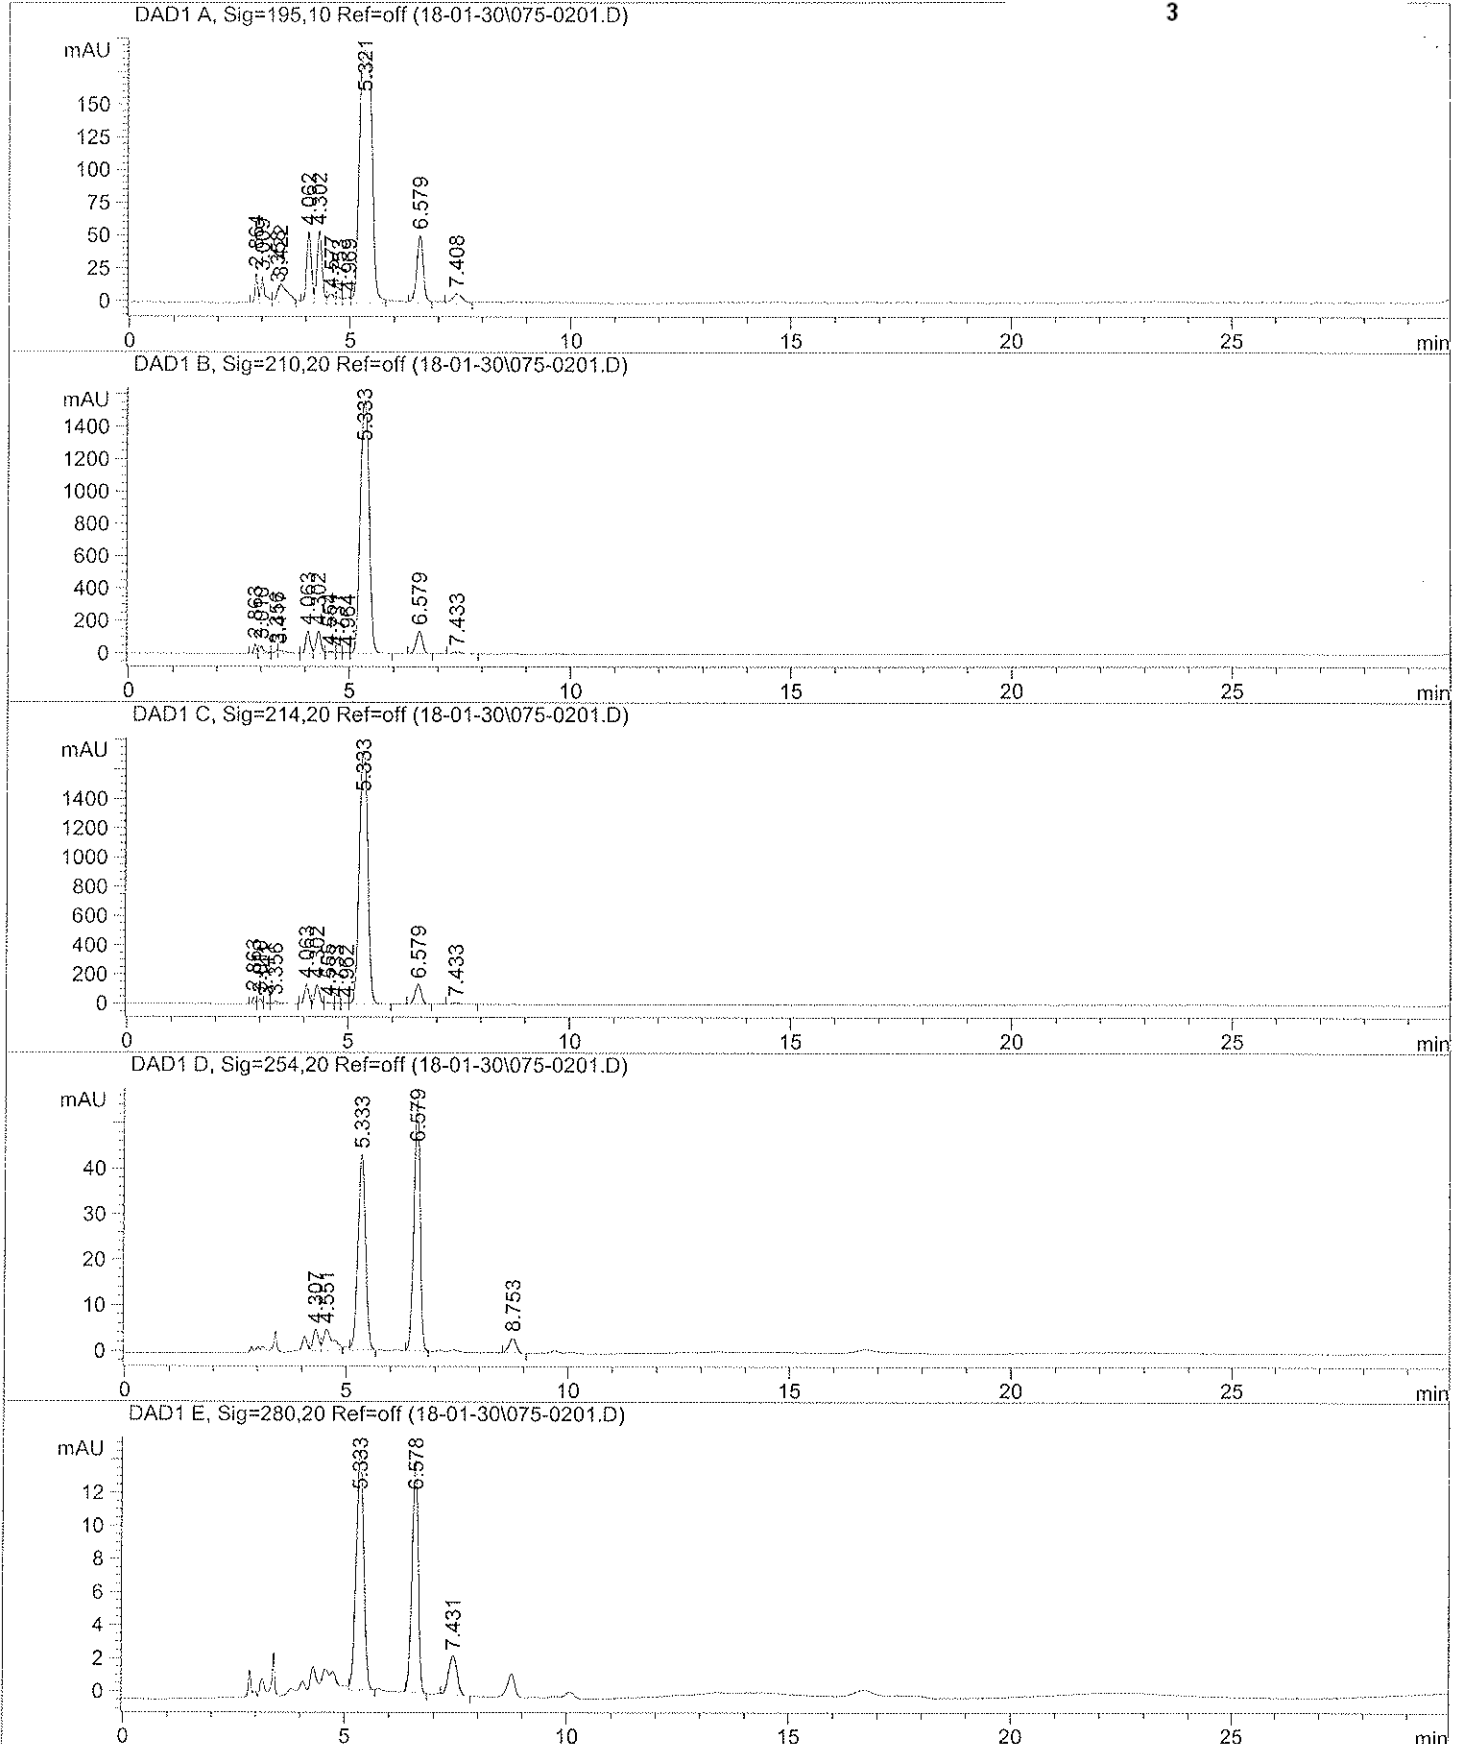

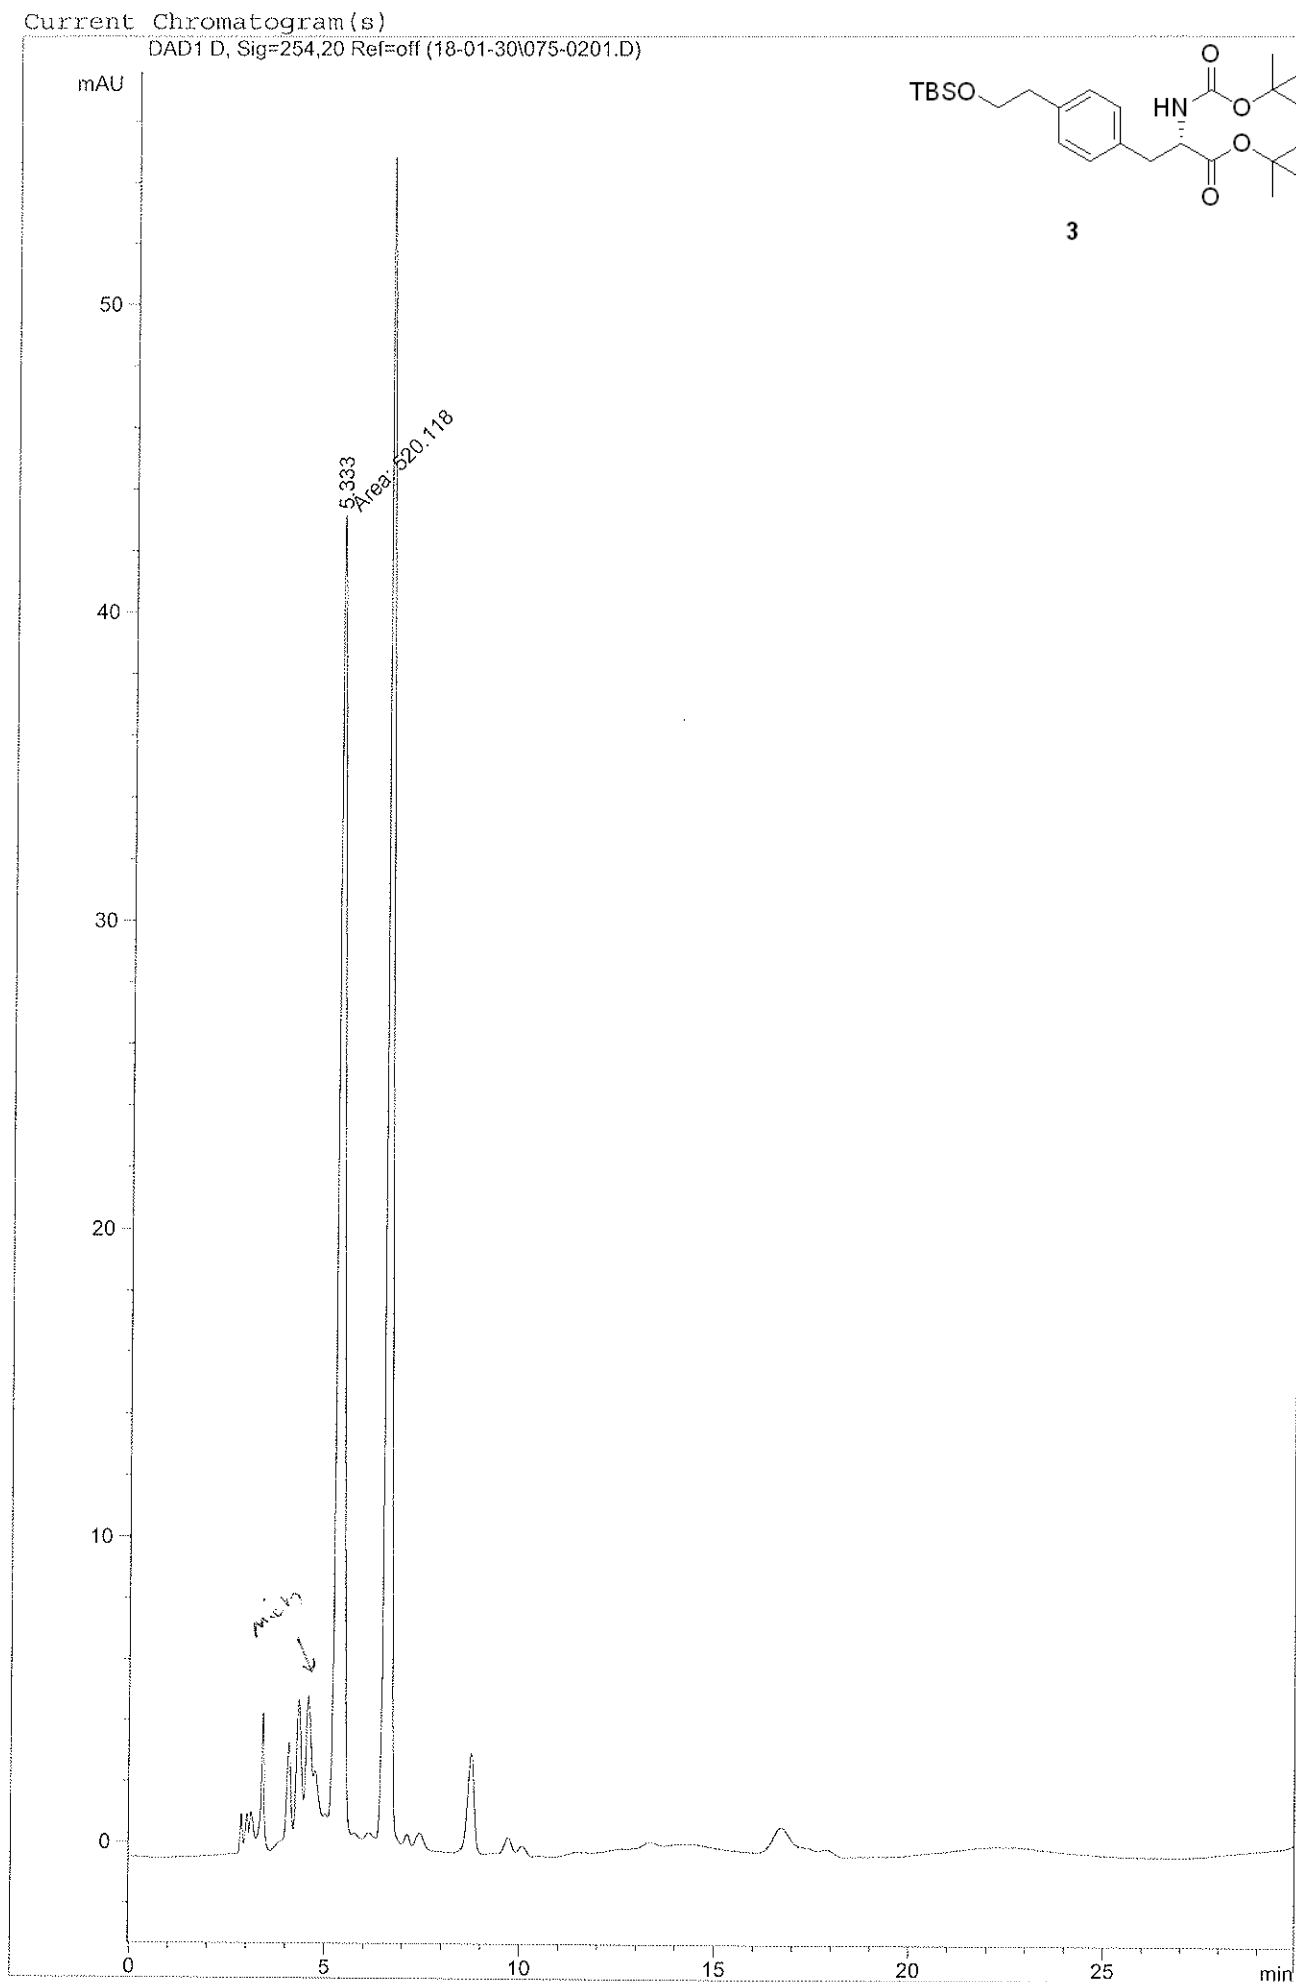



```

=====
Injection Date : 1/30/2018 7:51:39 PM      Seq. Line : 3
Sample Name    : 14                          Location  : Vial 76
Acq. Operator  : Jan Goeman                  Inj      : 1
                                           Inj Volume : Inj prog

Sequence File  : C:\HPCHEM\2\SEQUENCE\TEMP2.S
Method         : C:\HPCHEM\2\METHODS\AB97-3.M
Last changed   : 4/11/2016 11:58:26 AM by Jan Goeman
Chirale kolom .....
30' isocratisch n-Hexaan-EtOH 97:3
=====
    
```

Chiral HPLC analysis:  
Sample: cpd. 4

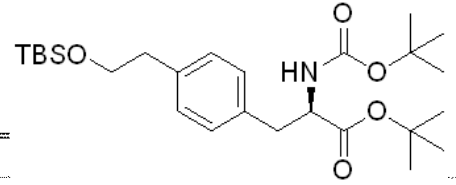

4

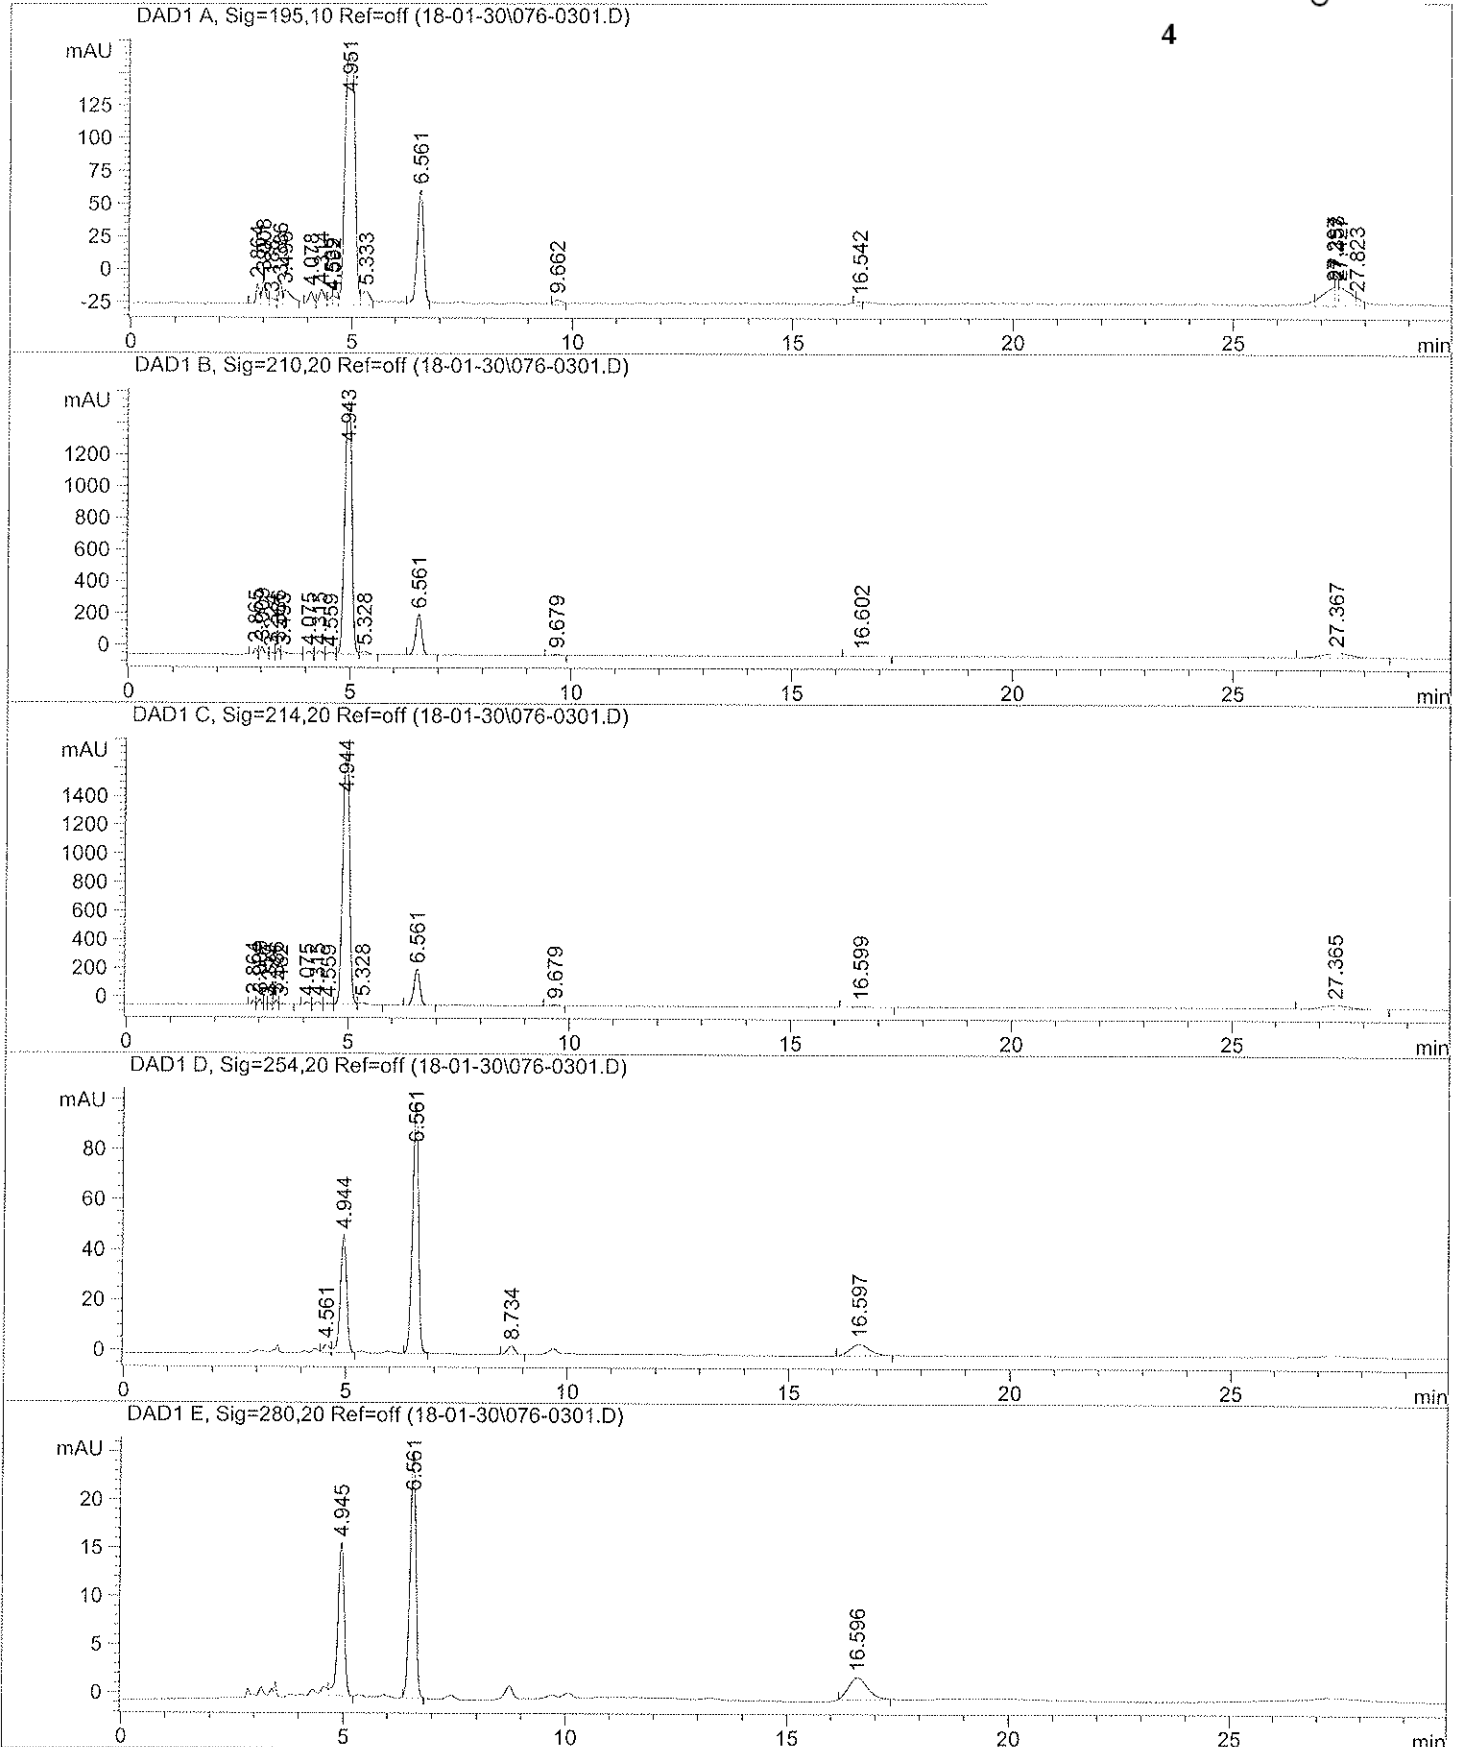

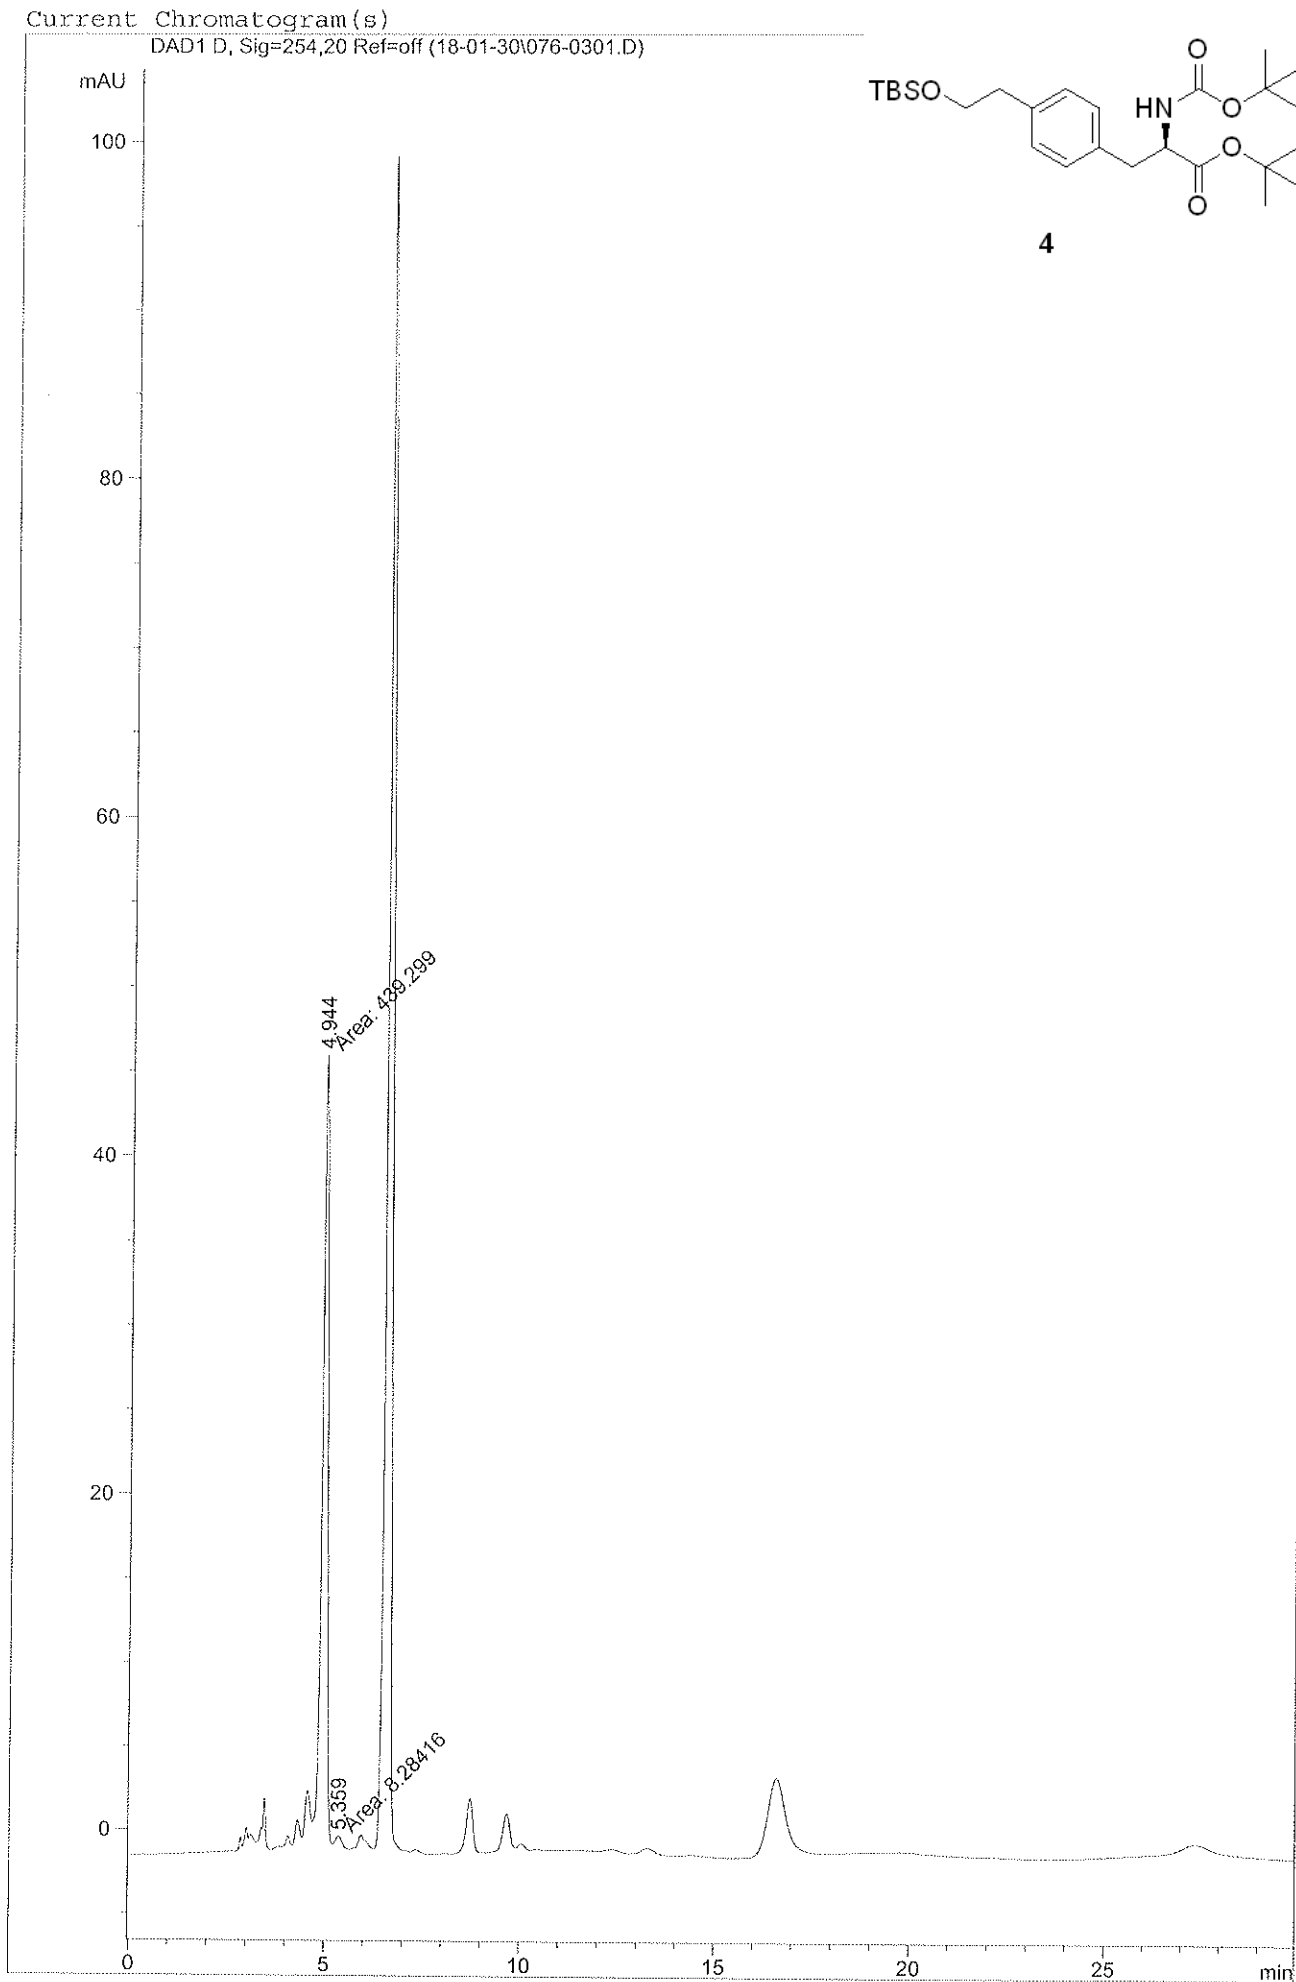

```

=====
Injection Date   : 1/30/2018 7:51:39 PM           Seq. Line :    3
Sample Name     : 14                             Location  : Vial 76
Acq. Operator   : Jan Goeman                     Inj       :    1
Acq. Instrument : Instrument 2                   Inj Volume: Inj prog
Acq. Method     : C:\HPCHEM\2\METHODS\AB97-3.M
Last changed    : 4/11/2016 11:58:26 AM by Jan Goeman
Analysis Method : C:\HPCHEM\1\METHODS\2CD30-70.M
Last changed    : 1/26/2018 2:43:53 PM by Jan Goeman
                  (modified after loading)

```

```

kolom 2
10' Spoelen met 30:70
pomp 1ml/min, geen MS

```

```

=====
                          Area Percent Report
=====

```

```

Sorted By           :      Signal
Multiplier          :      1.0000
Dilution            :      1.0000

```

Signal 1: DAD1 A, Sig=195,10 Ref=off

Signal 2: DAD1 B, Sig=210,20 Ref=off

Signal 3: DAD1 C, Sig=214,20 Ref=off

Signal 4: DAD1 D, Sig=254,20 Ref=off

| Peak # | RetTime [min] | Type | Width [min] | Area [mAU*s] | Height [mAU] | Area %  |
|--------|---------------|------|-------------|--------------|--------------|---------|
| 1      | 4.944         | MM   | 0.1584      | 439.29868    | 46.22877     | 98.1491 |
| 2      | 5.359         | MM   | 0.2010      | 8.28416      | 6.86988e-1   | 1.8509  |

Totals :                                    447.58283    46.91576

Signal 5: DAD1 E, Sig=280,20 Ref=off

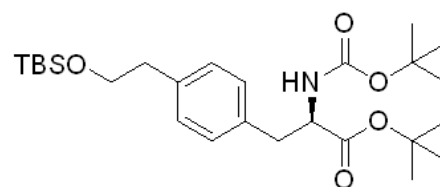

4

Sample: cpd. 4

```

=====
*** End of Report ***
=====

```

## Chiral purity analysis of compound **9** & **10**

Chromatographic conditions for **9** & **10**:

Diacel Chiralpak IB, 250 x 4.6 mm, particle size 5  $\mu\text{m}$ . Column temperature was set at 35  $^{\circ}\text{C}$ . The chromatographic run was performed isocratically with a mixture of *n*-Hexane/EtOH(abs.) (97/3) and a run length of 30 at a flow rate of 1 mL/min.

Injection Date : 12/22/2017 2:06:37 PM  
 Sample Name : L  
 Acq. Operator : Jan Goeman

Seq. Line : 2  
 Location : Vial 12  
 Inj : 1  
 Inj Volume : Inj prog

Optimization of chiral HPLC  
 Sample: cpd. 9 & 10

Sequence File : C:\HPCHEM\2\SEQUENCE\TEMP2.S  
 Method : C:\HPCHEM\2\METHODS\AB97-3.M  
 Last changed : 4/11/2016 11:58:26 AM by Jan Goeman  
 Chirale kolom .....  
 30' isocratisch n-Hexaan-EtOH 97:3

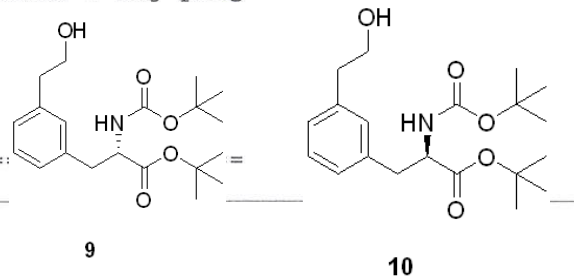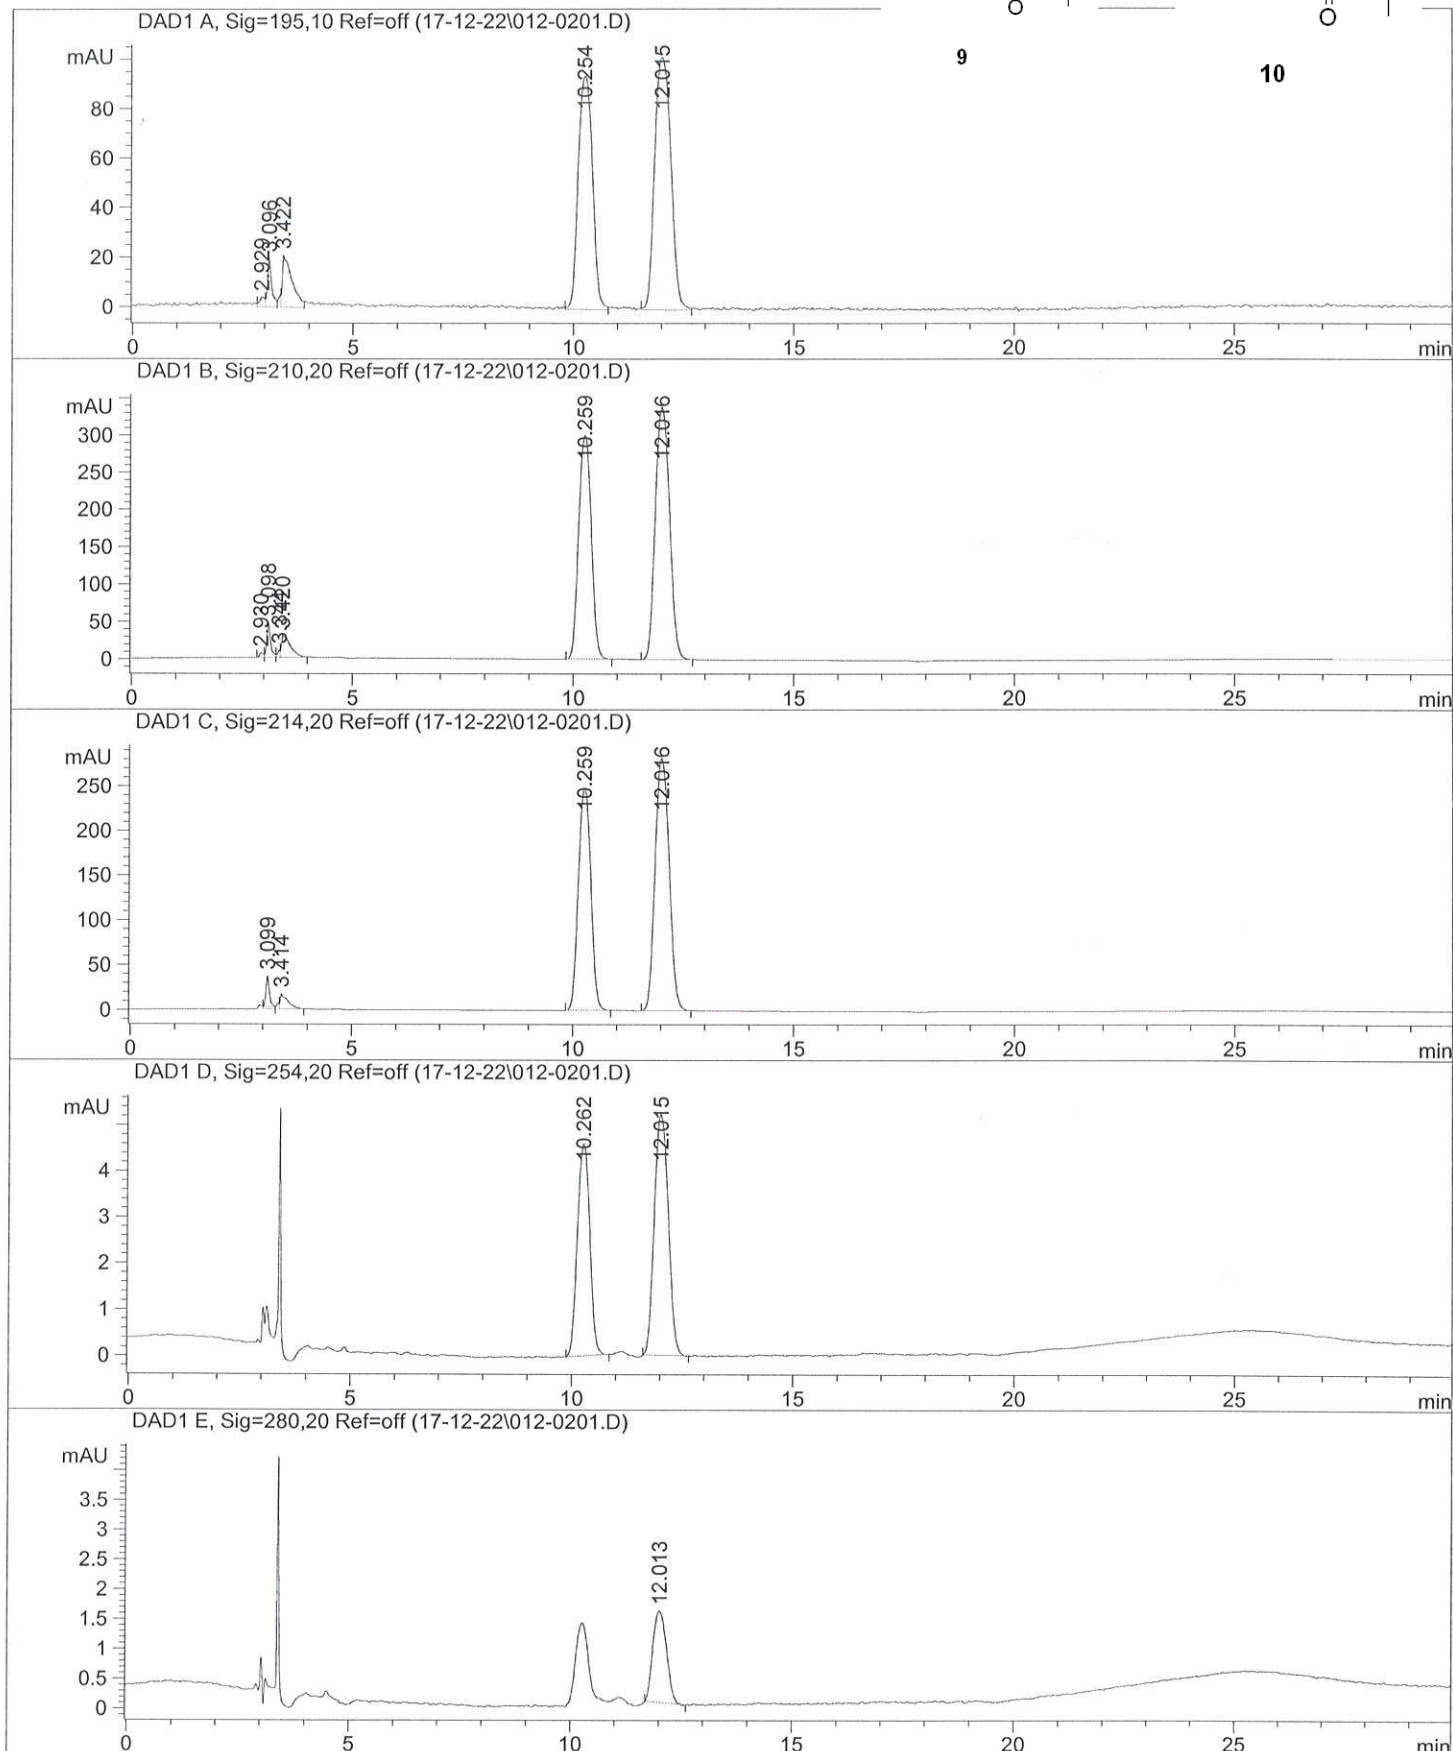



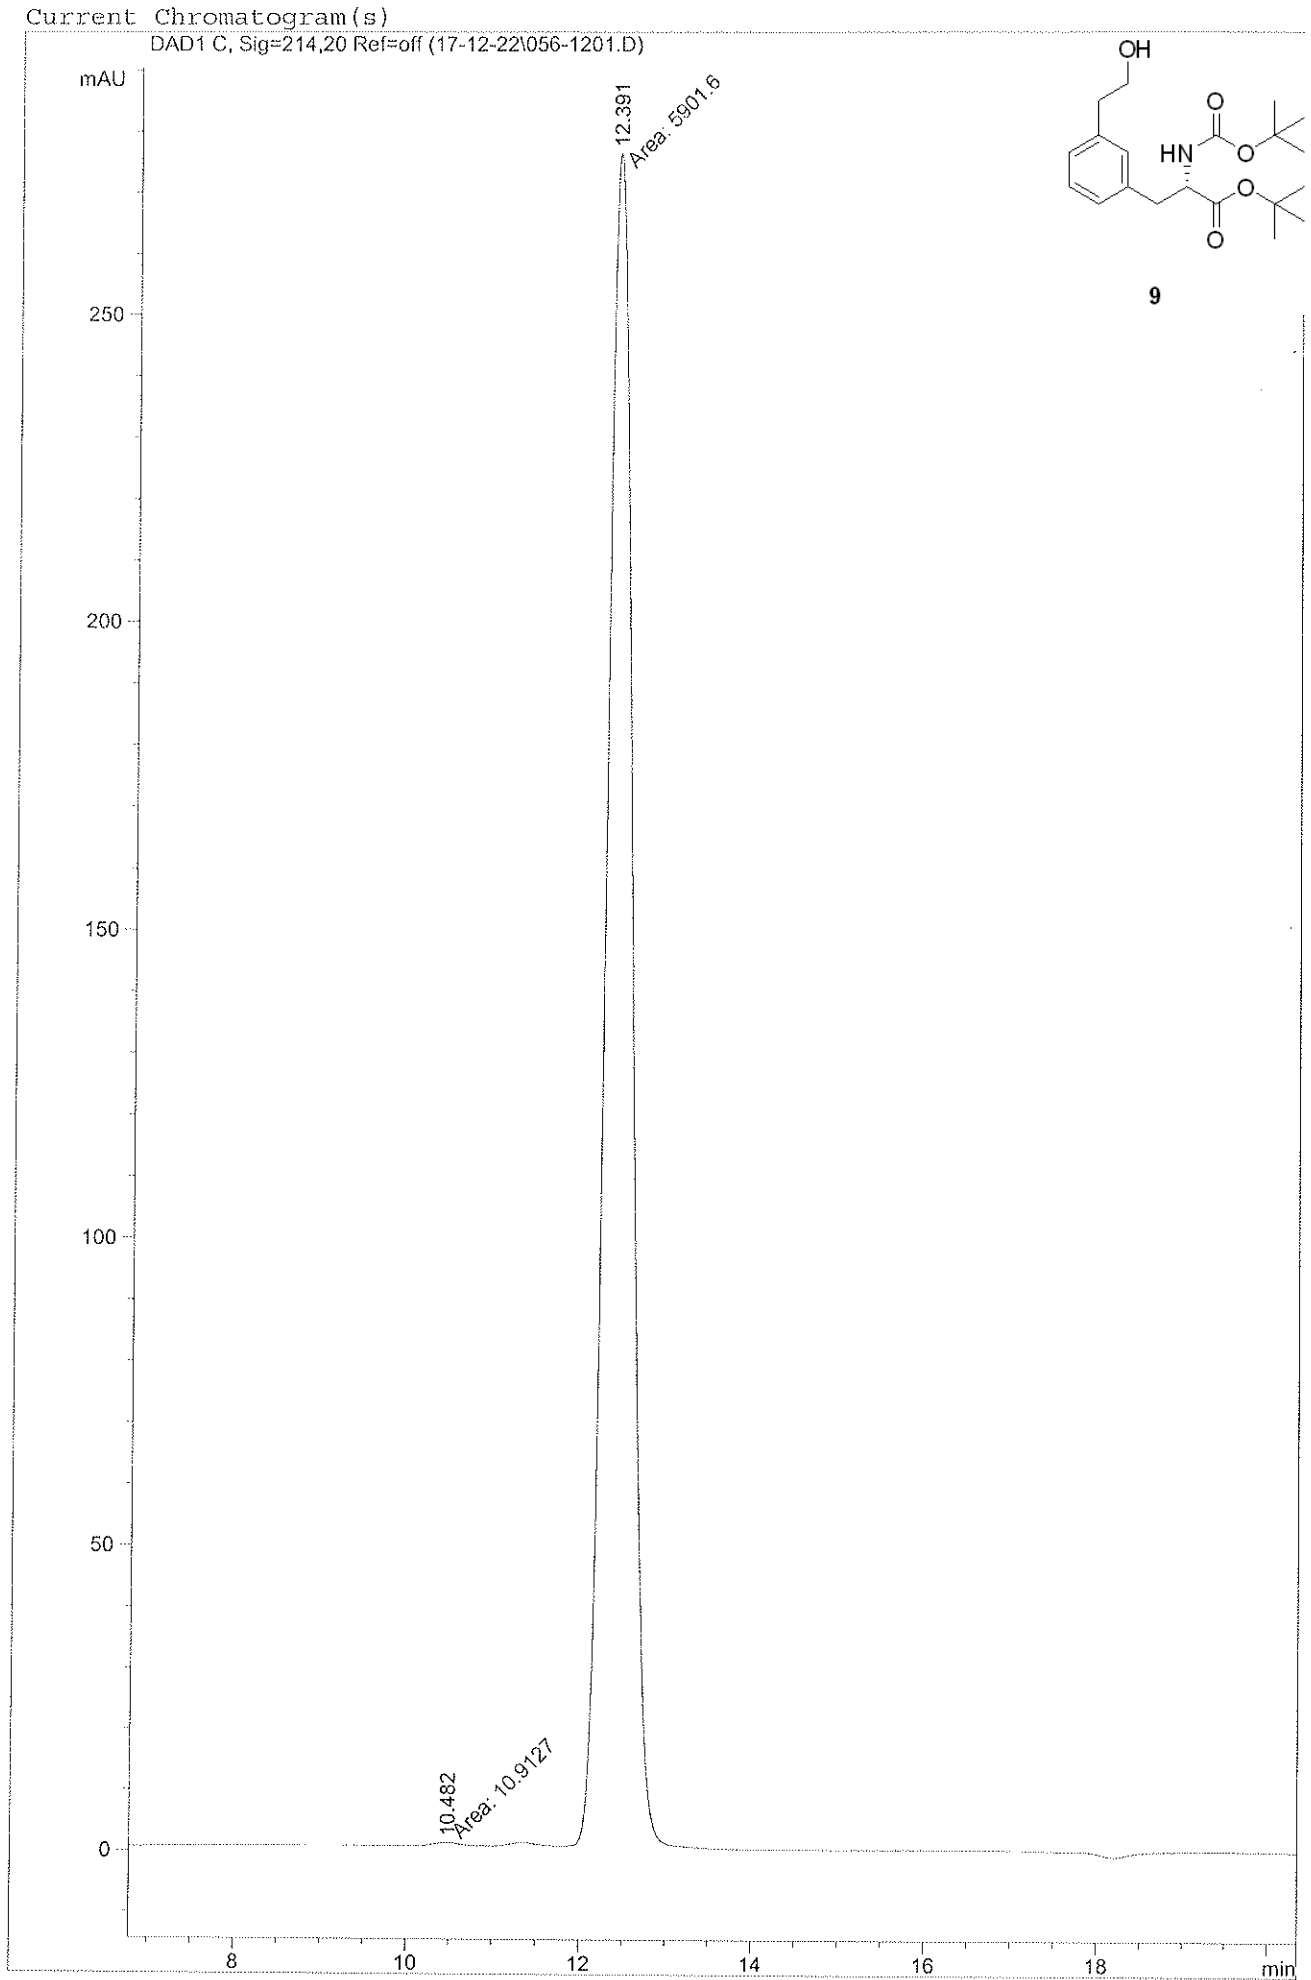





```

=====
Injection Date   : 12/22/2017 8:14:01 PM      Seq. Line : 13
Sample Name     : 24                          Location  : Vial 57
Acq. Operator   : Jan Goeman                 Inj      : 1
                                           Inj Volume: Inj prog

Sequence File   : C:\HPCHEM\2\SEQUENCE\TEMP2.S
Method          : C:\HPCHEM\2\METHODS\AB97-3.M
Last changed    : 4/11/2016 11:58:26 AM by Jan Goeman
Chirale kolom   : .....
30' isocratisch n-Hexaan-EtOH 97:3
=====
    
```

Chiral HPLC analysis  
Compound 10

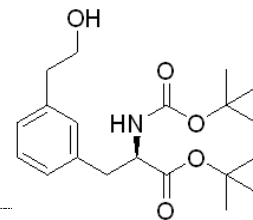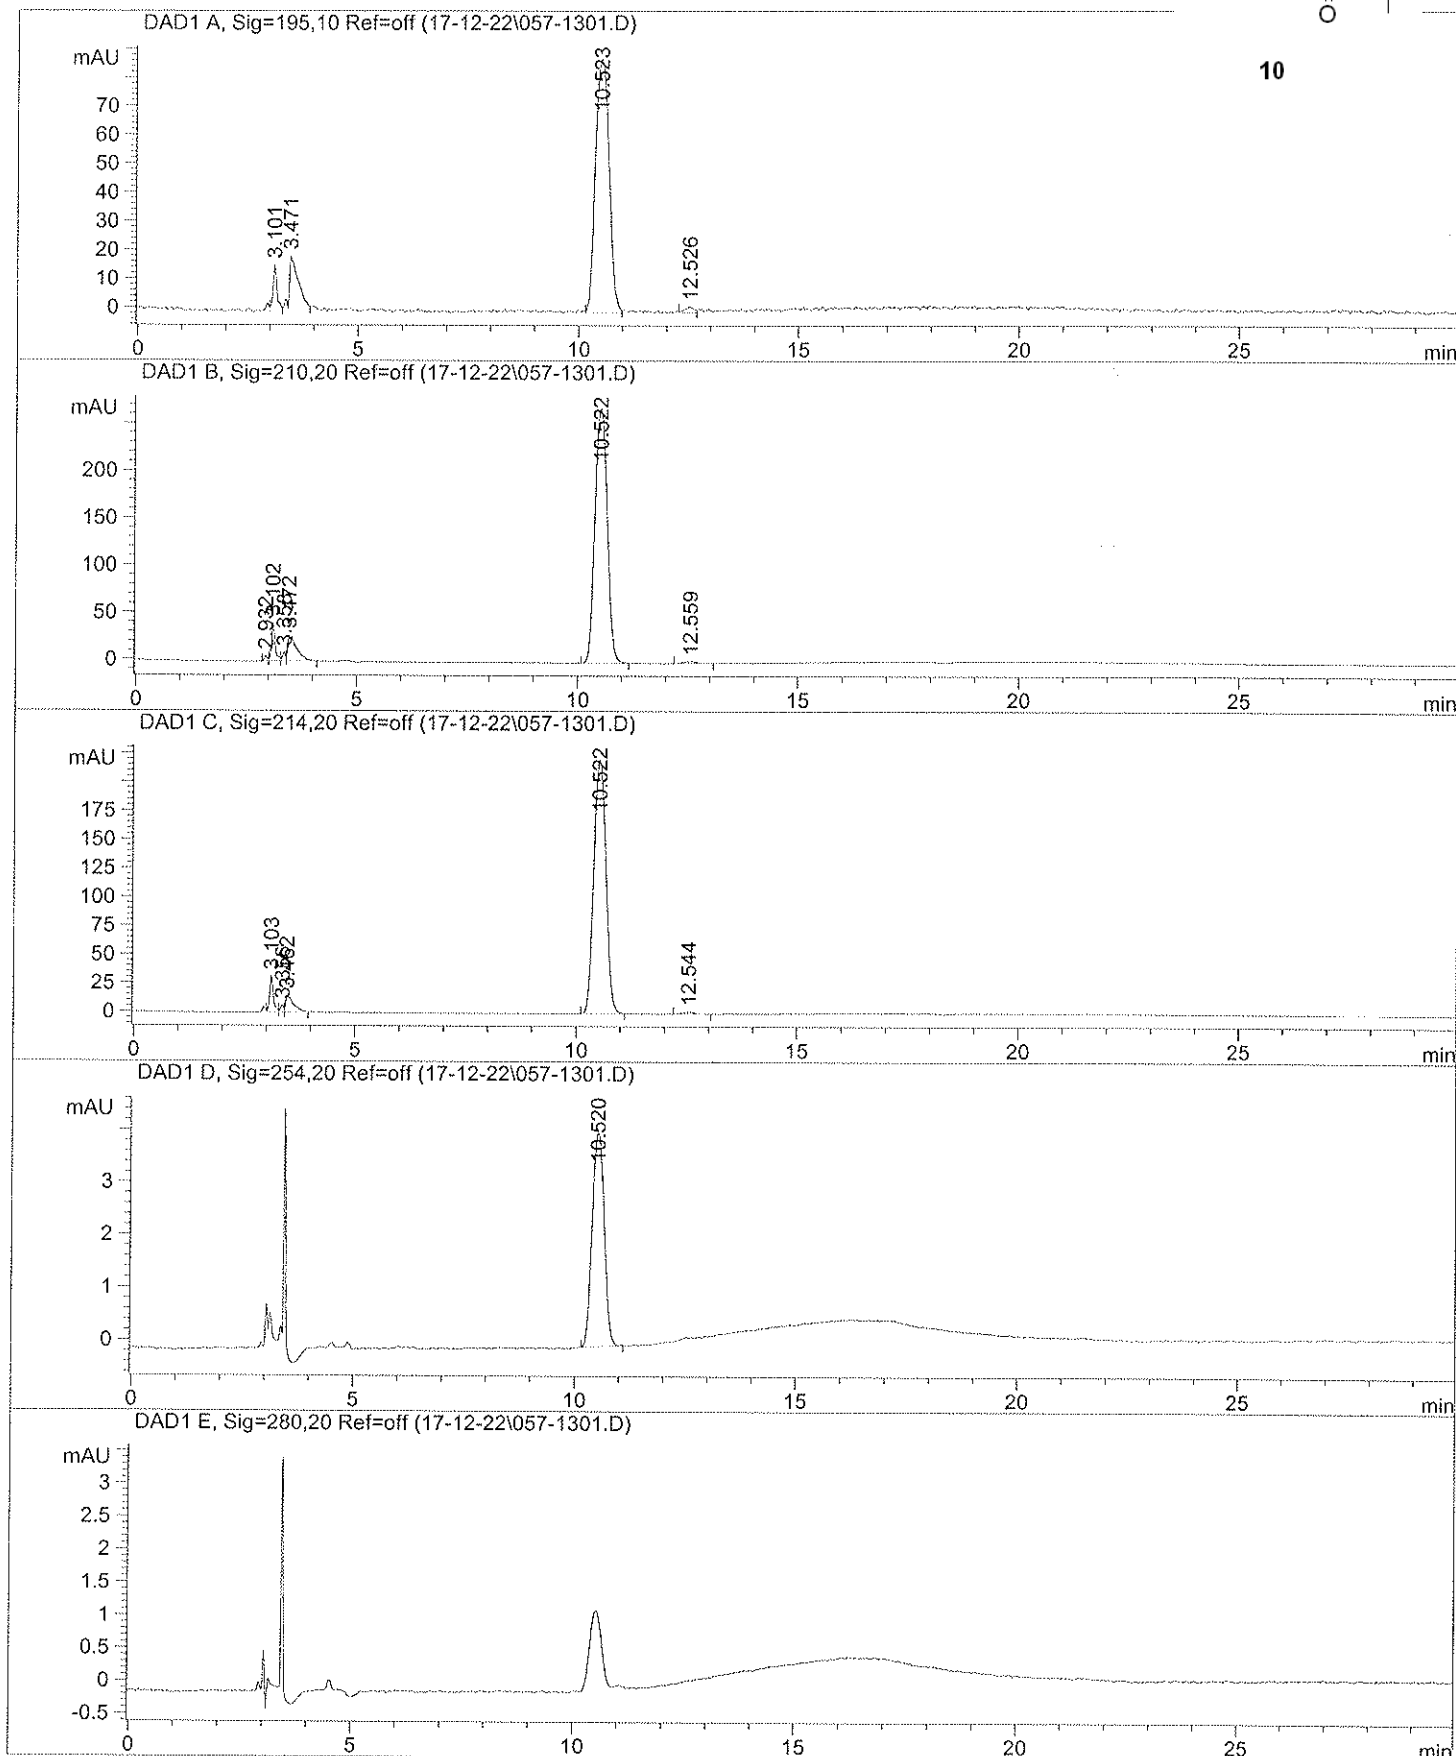

Current Chromatogram(s)

DAD1 C, Sig=214,20 Ref=off (17-12-22\057-1301.D)

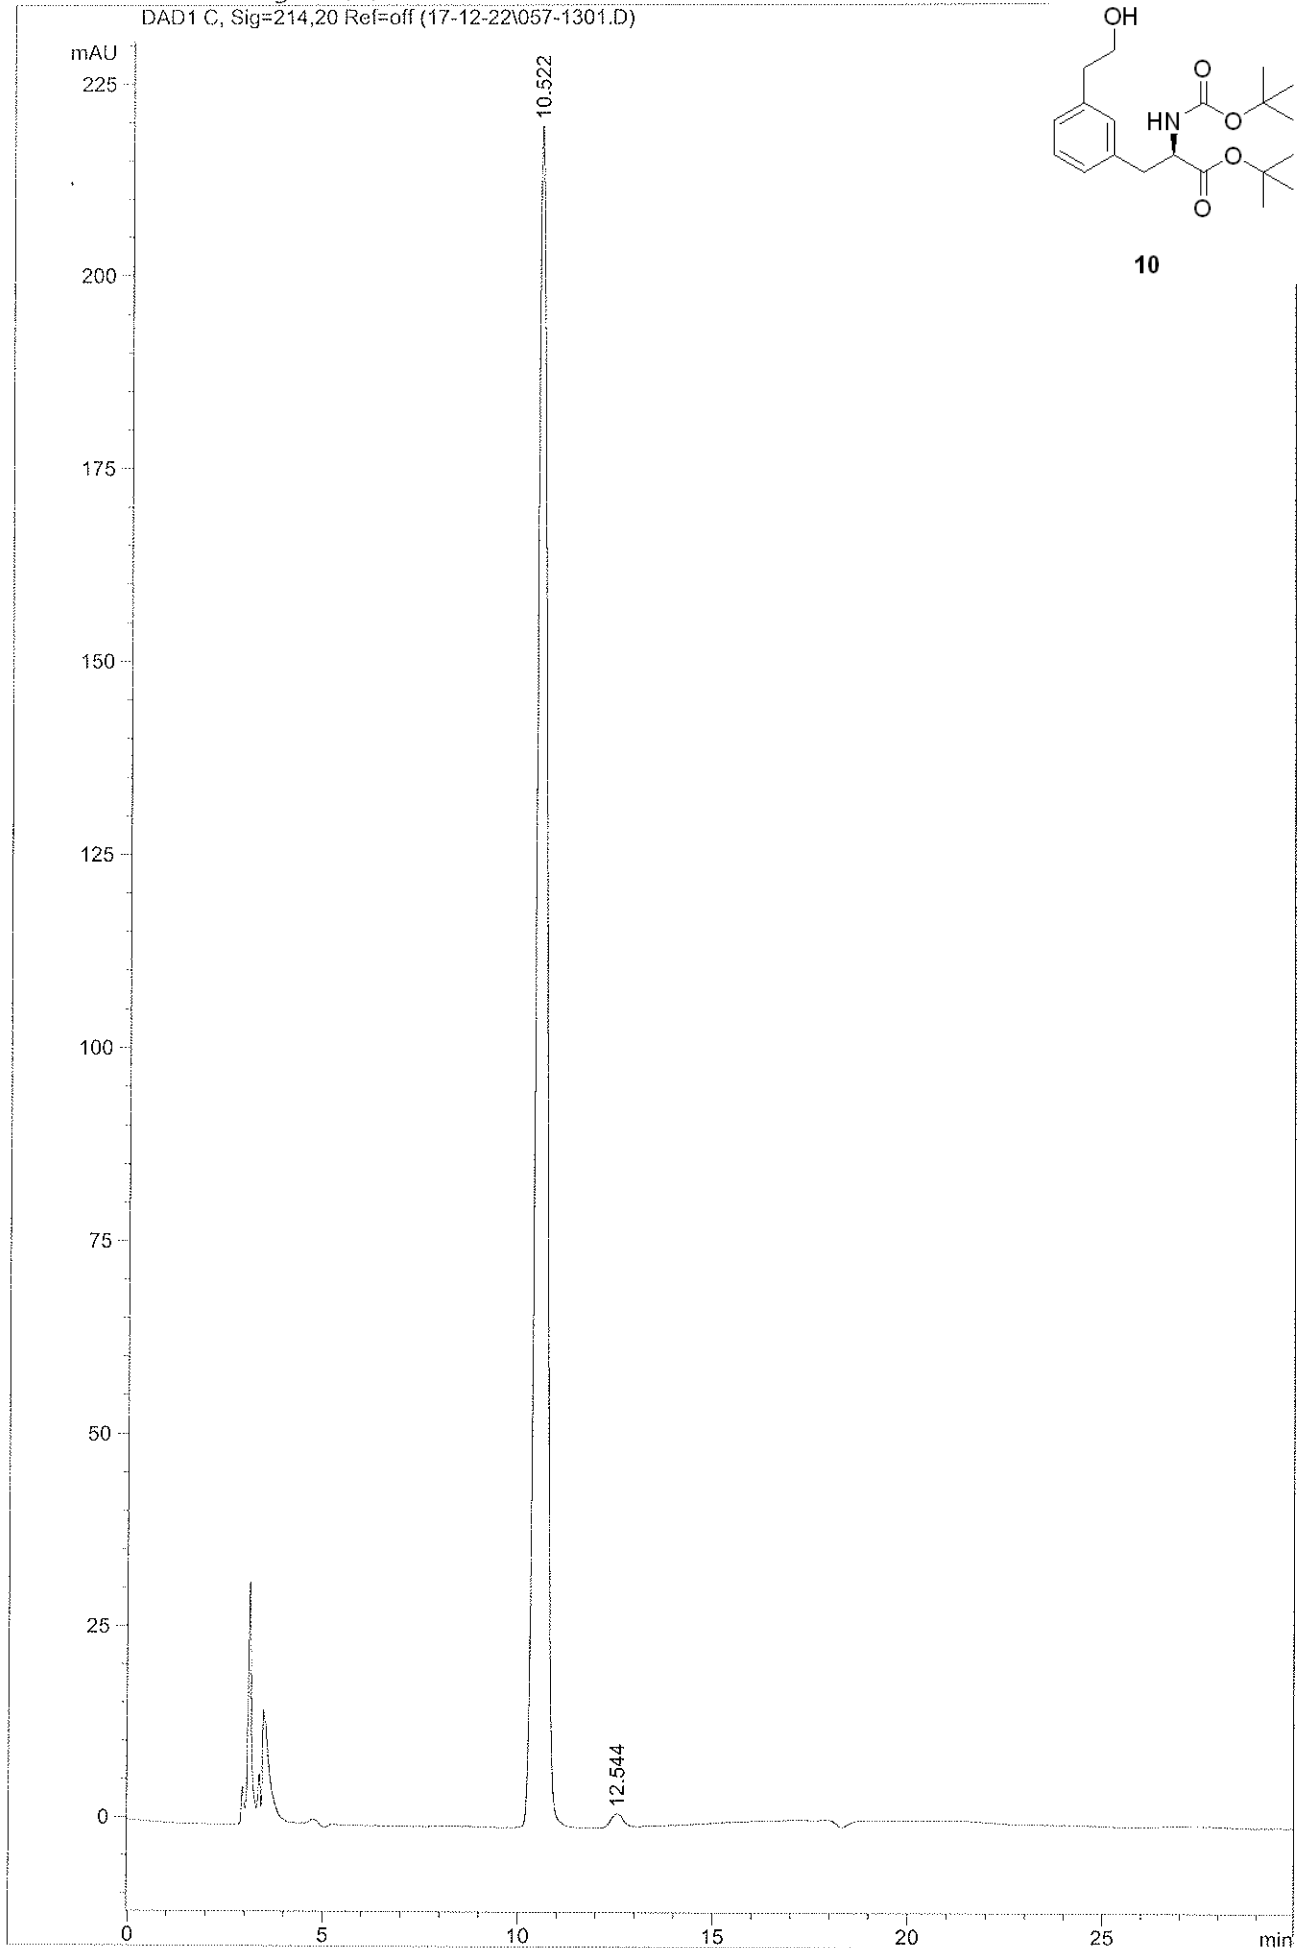

```

=====
Injection Date   : 12/22/2017 8:14:01 PM      Seq. Line :   13
Sample Name     : 24                          Location  : Vial 57
Acq. Operator   : Jan Goeman                  Inj       :    1
Acq. Instrument : Instrument 2                 Inj Volume: Inj prog
Acq. Method     : C:\HPCHEM\2\METHODS\AB97-3.M
Last changed    : 4/11/2016 11:58:26 AM by Jan Goeman
Analysis Method : C:\HPCHEM\1\METHODS\2CD30-70.M
Last changed    : 1/26/2018 2:43:53 PM by Jan Goeman
                  (modified after loading)

```

```

kolom 2
10' Spoelen met 30:70
pomp 1ml/min, geen MS

```

```

=====
                          Area Percent Report
=====

```

```

Sorted By           :      Signal
Multiplier          :      1.0000
Dilution            :      1.0000

```

```

Signal 1: DAD1 C, Sig=214,20 Ref=off

```

| Peak # | RetTime [min] | Type | Width [min] | Area [mAU*s] | Height [mAU] | Area %  |
|--------|---------------|------|-------------|--------------|--------------|---------|
| 1      | 10.522        | BB   | 0.3103      | 4241.71045   | 220.65605    | 99.1330 |
| 2      | 12.544        | PB   | 0.3225      | 37.09894     | 1.75574      | 0.8670  |

```

Totals :                      4278.80939  222.41179

```

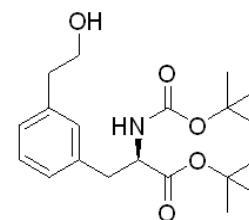

**10**

```

=====
*** End of Report ***

```

## Chiral purity analysis of compound **15** & **16**

Chromatographic conditions for **15** & **16**:

Chiral capillary electrophoresis (CE) employed a 64.5 cm capillary (50  $\mu\text{m}$  diameter). The electrolyte used consisted of 25 mM phosphate buffer pH 2.5 + 5% HS-gammaCD chiral modifier. Analysis time was 40 min at -20 kV.

Injection Date : 4/18/18 9:35:04 PM  
 Sample Name : 19+21  
 Acq. Operator : Jan Goeman  
 Sequence File : C:\HPCHEM\1\SEQUENCE\TEMP.S  
 Method : C:\HPCHEM\1\METHODS\CE\01-4  
 Last changed : 5/11/11 3:19:59 PM by Jan C  
 CE met buffer 1

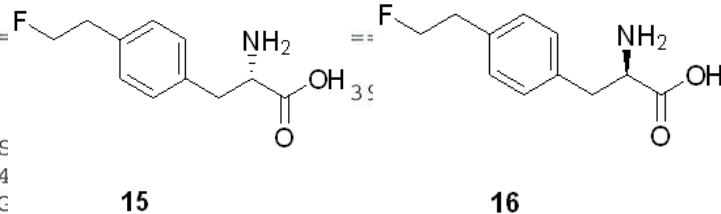

L= 64.5 cm / d= .50.um / pH. 2.5 .25 mM / SDS. 1 mM / K<sub>2</sub>S<sub>2</sub>O<sub>8</sub> .5 mM

Optimization of CE analysis  
 Sample: cpd. 15 & 16

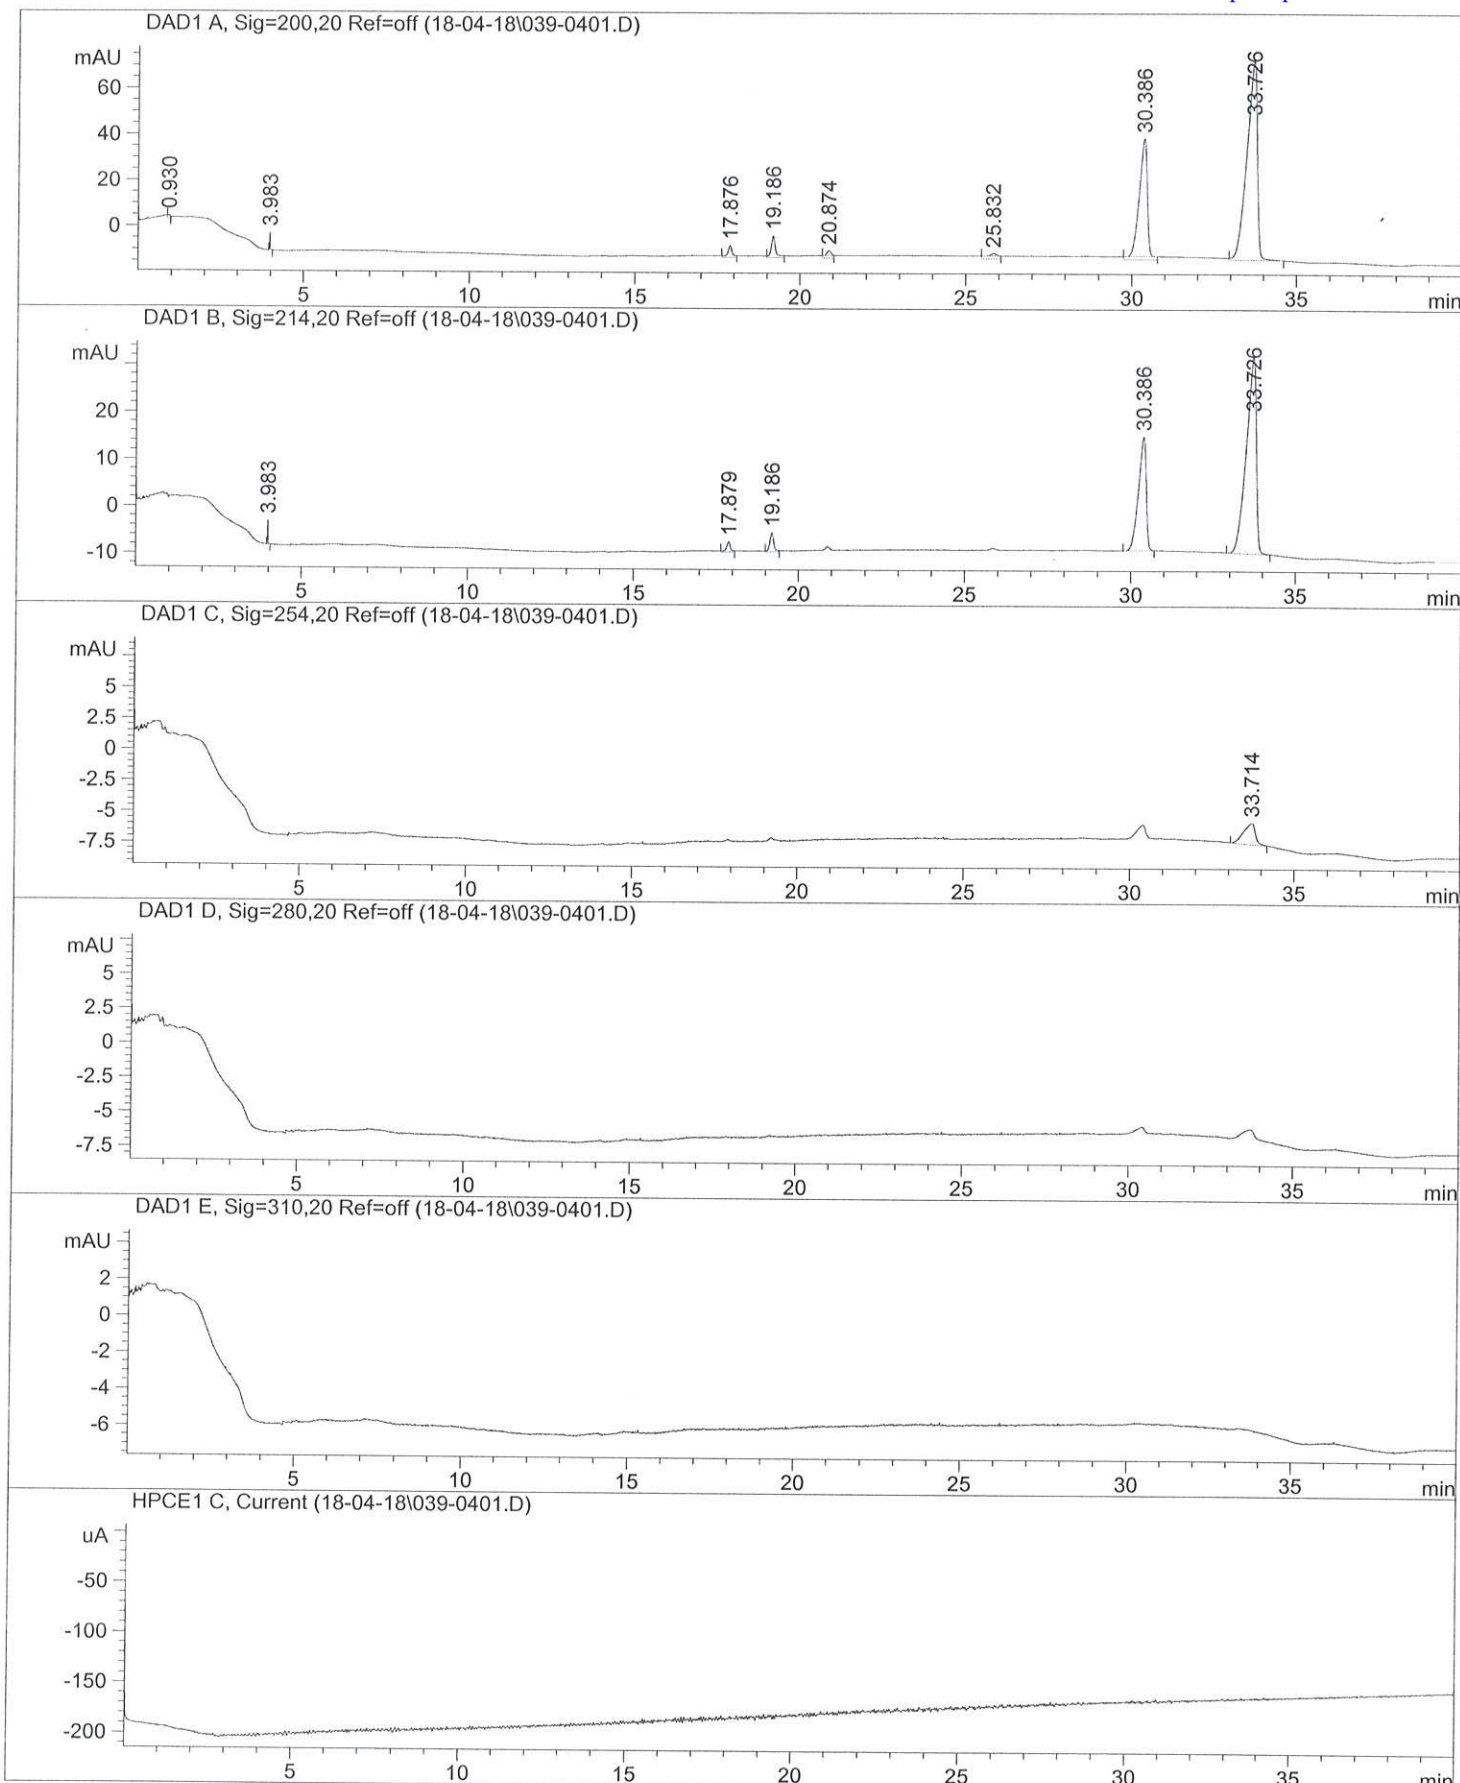

Peak Apex Spectra

\*DAD1, 30.385 (91.1 mAU, -) Ref=30.261 & 30.511 of 039-0401.D  
\*DAD1, 33.728 (161 mAU, -) Ref=33.581 & 33.871 of 039-0401.D

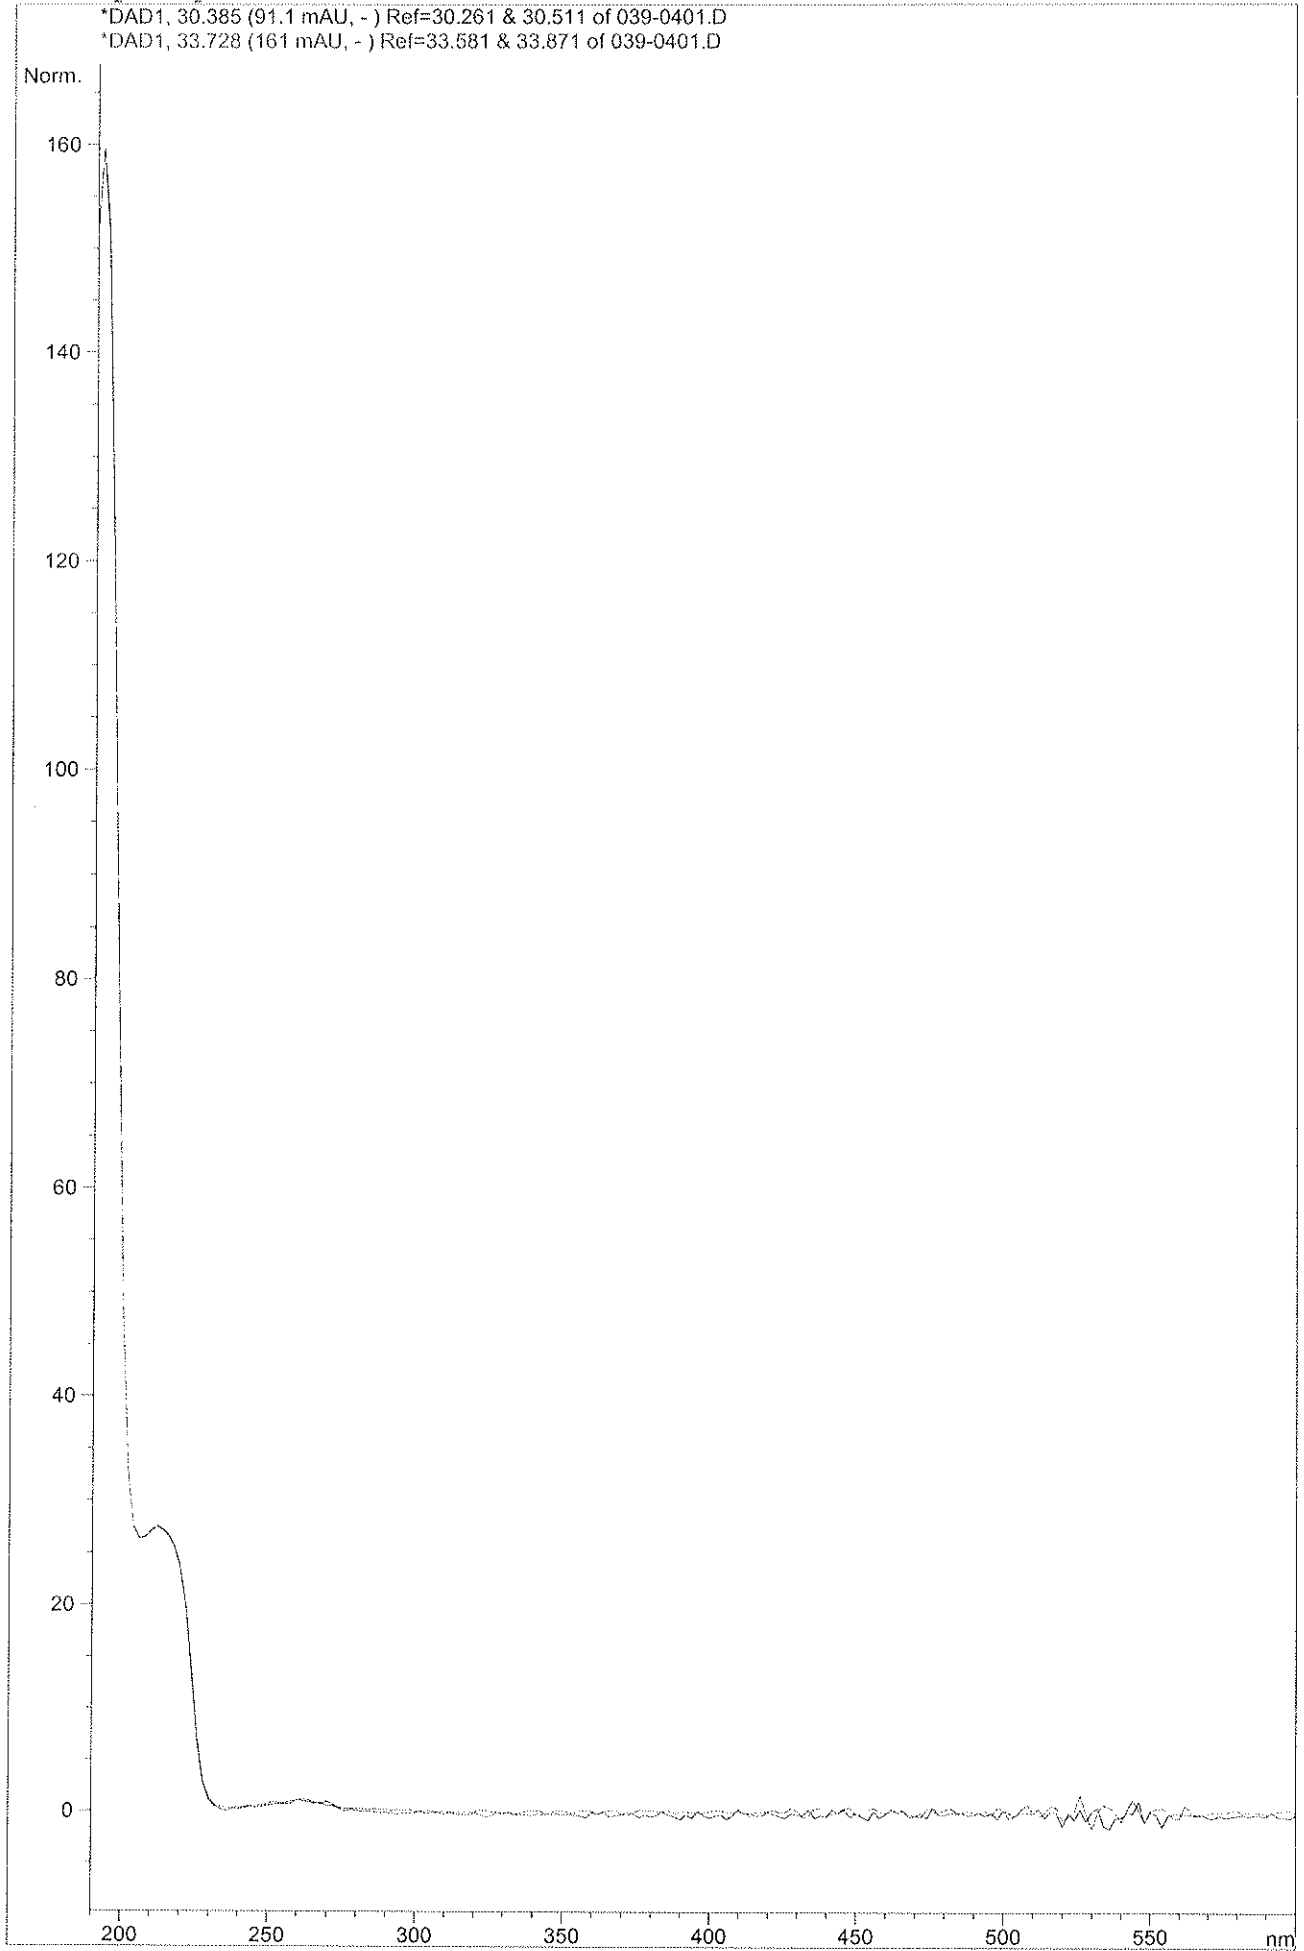

Injection Date : 4/18/18 10:19:20 PM      Seq. Line : 5  
 Sample Name : 19      Location : Vial 37  
 Acq. Operator : Jan Goeman      Inj : 1  
 Sequence File : C:\HPCHEM\1\SEQUENCE\TEMP.S  
 Method : C:\HPCHEM\1\METHODS\CE\01-40N20.M  
 Last changed : 5/11/11 3:19:59 PM by Jan Goeman  
 CE met buffer 1  
 L= *64.5* .cm / d= *50* .um / pH *2.5* . *2.5* .mM / SDS *1* .mM / *MS* .CD *.5* .%

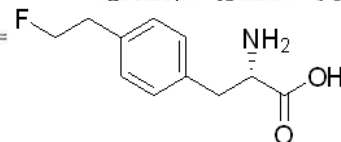

15

Sample: cpd. 15

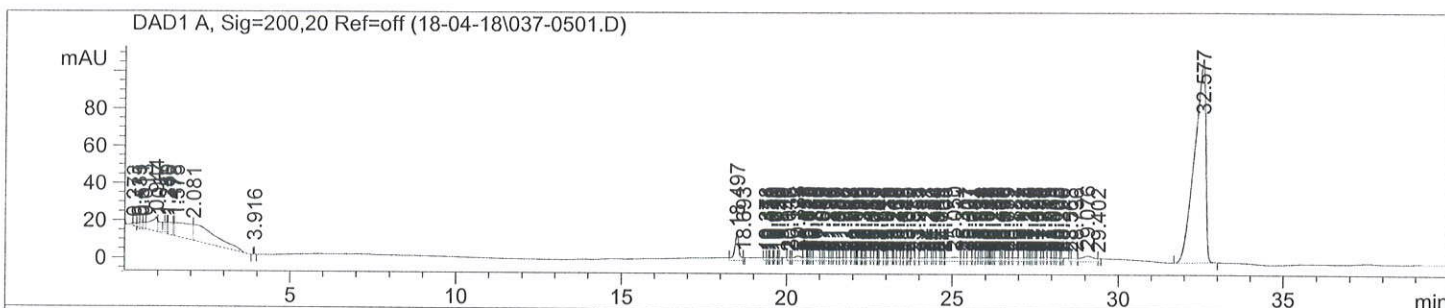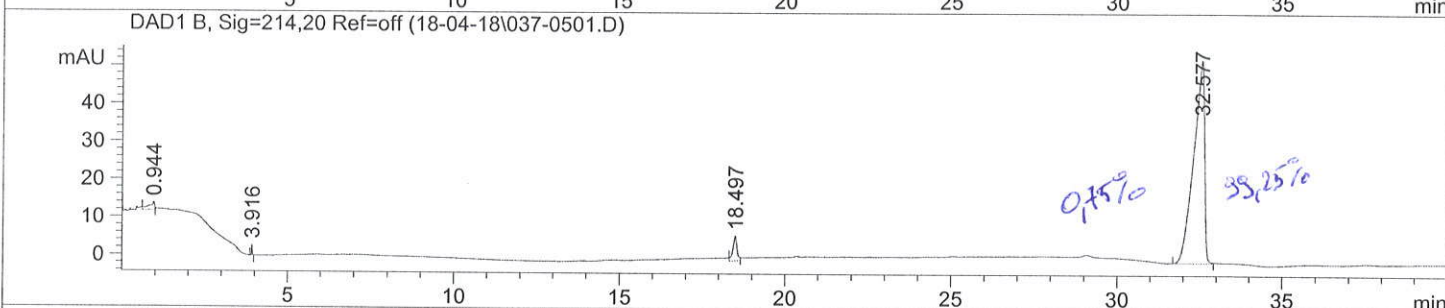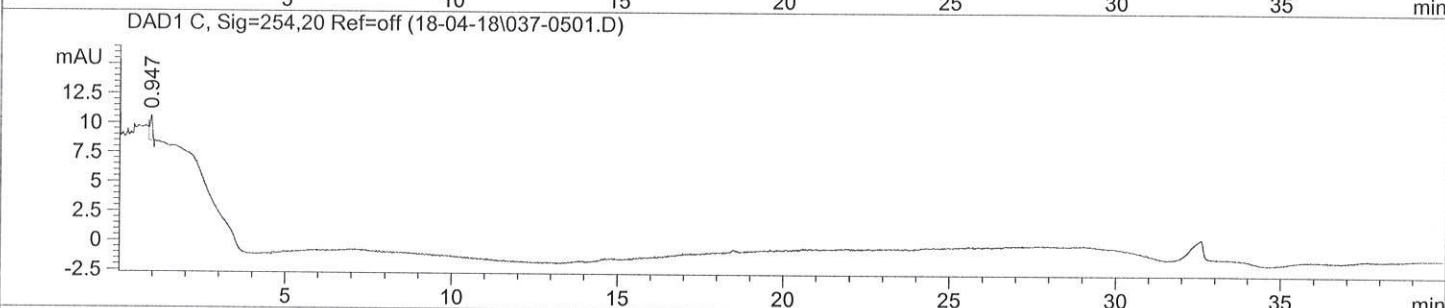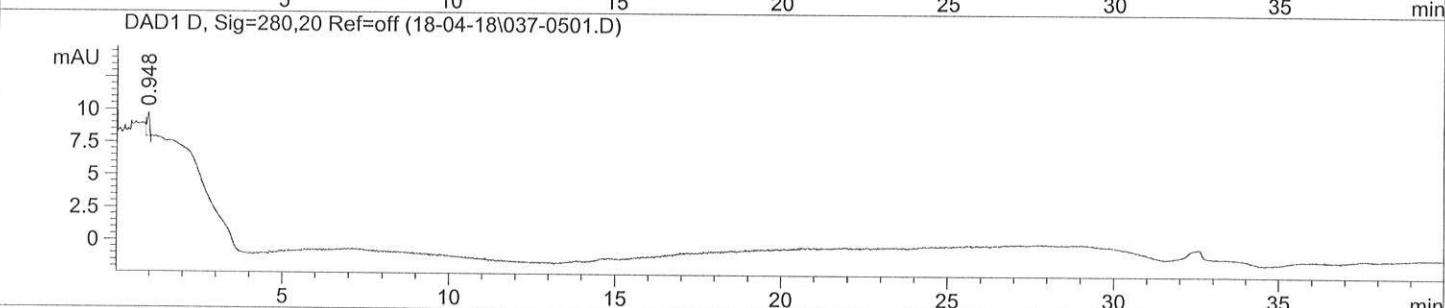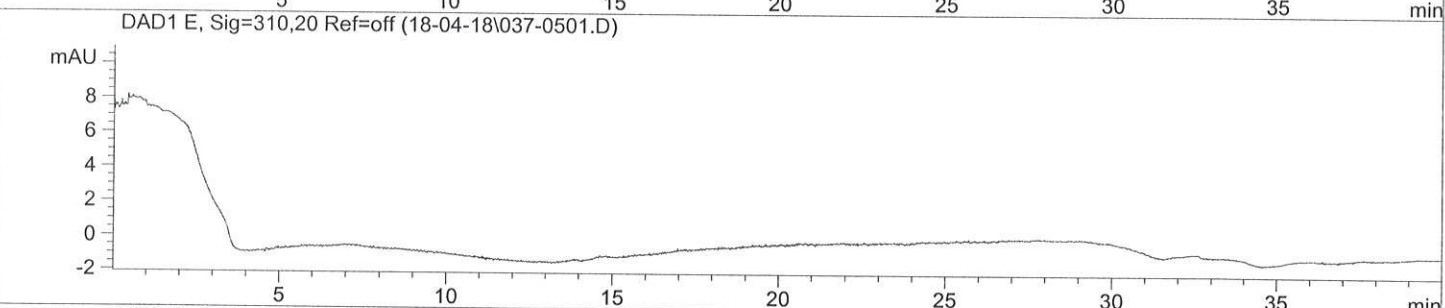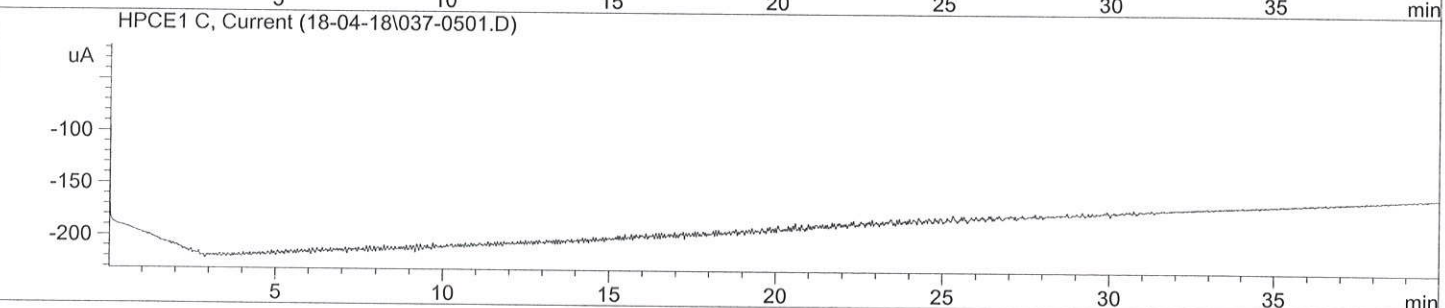

Current Electropherogram(s)

DAD1 B, Sig=214,20 Ref=off (18-04-18\037-0501.D)

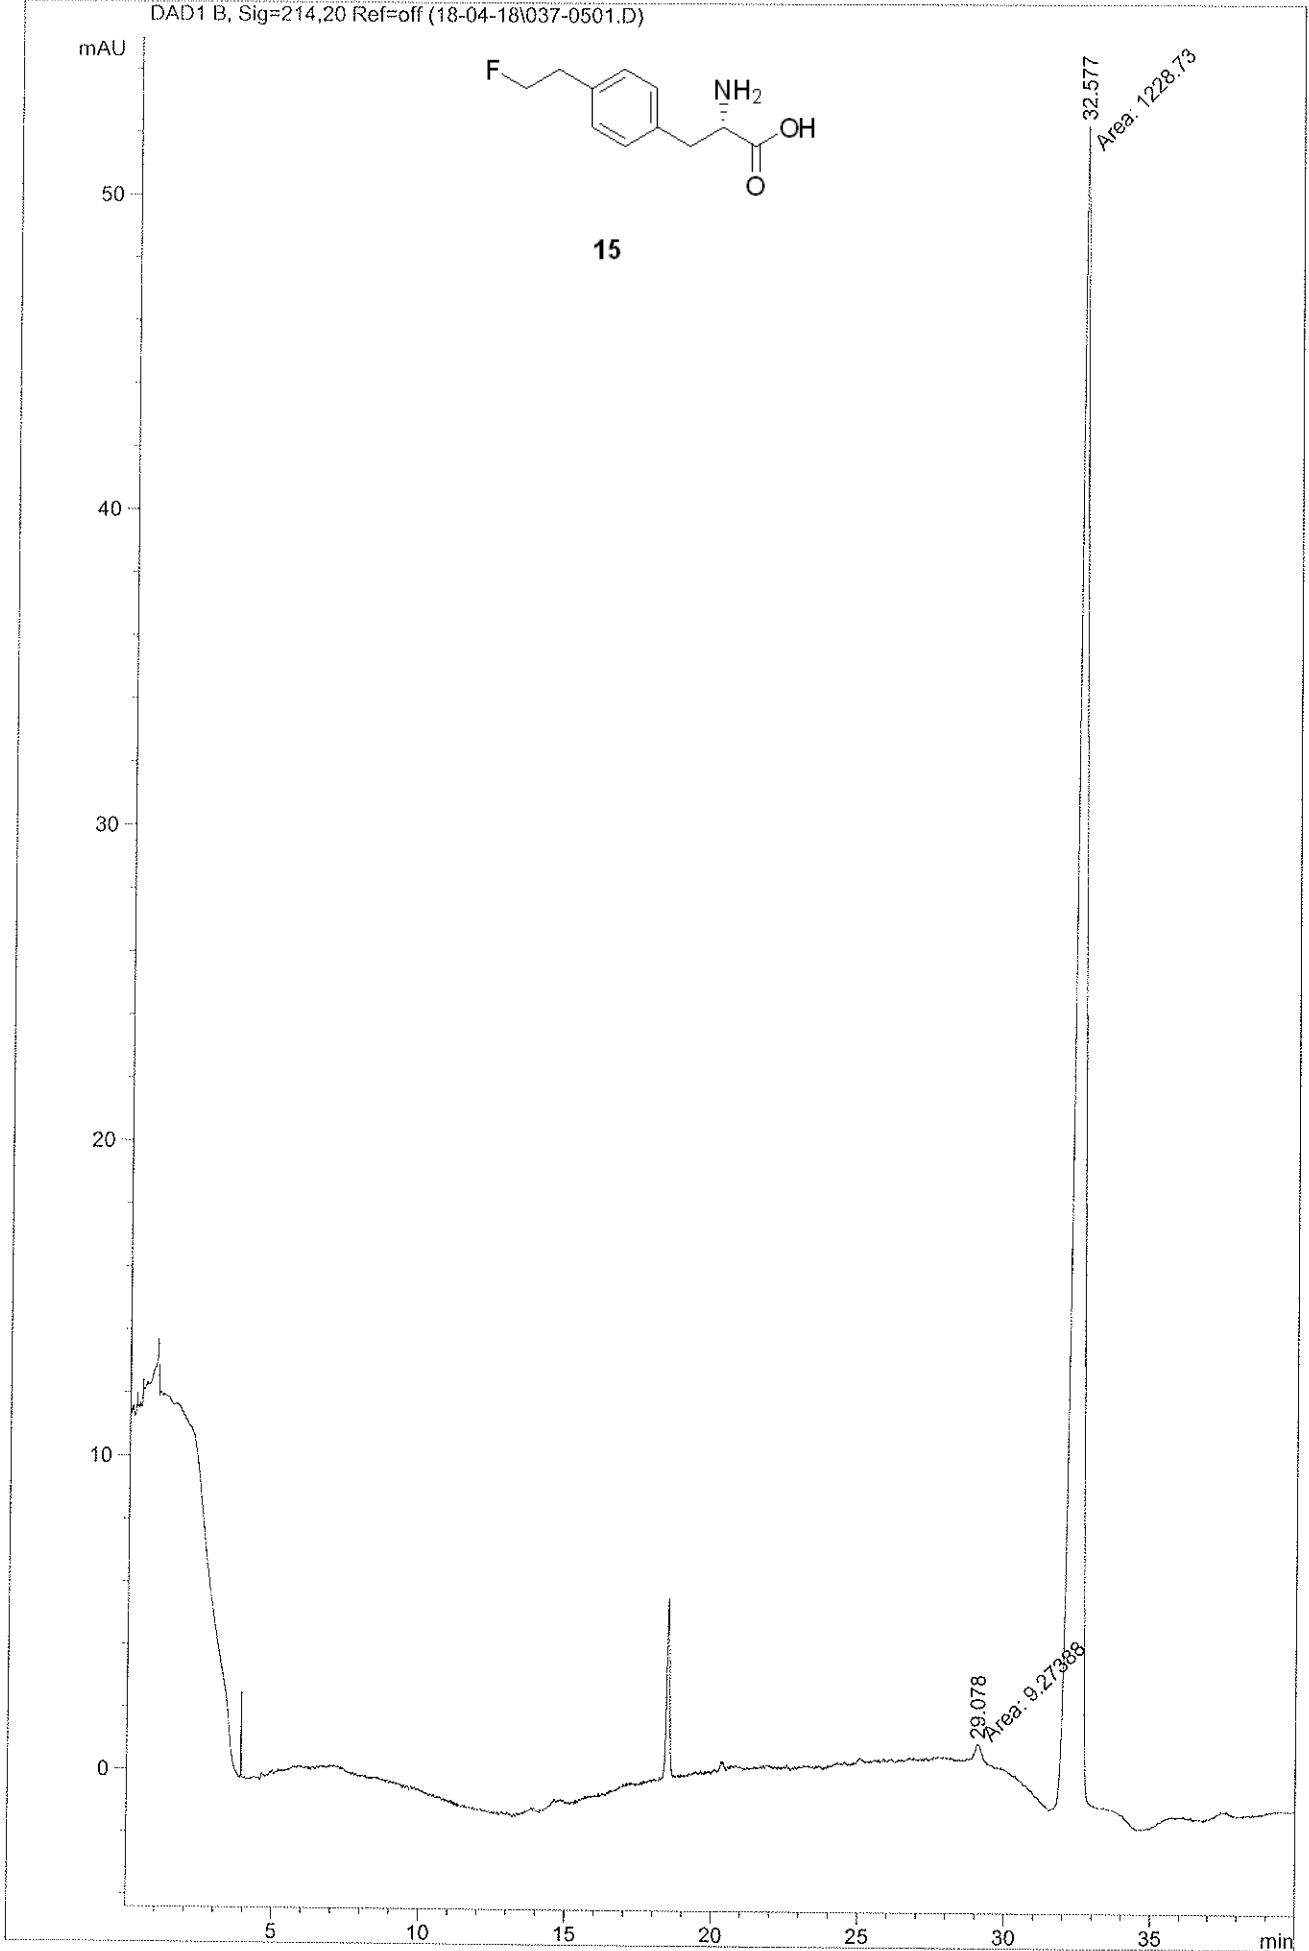



```

=====
Injection Date   : 4/18/18 10:19:20 PM          Seq. Line :    5
Sample Name     : 19                          Location  : Vial 37
Acq. Operator   : Jan Goeman                  Inj      :    1
Acq. Method     : C:\HPCHEM\1\METHODS\CE\01-40N20.M
Last changed    : 5/11/11 3:19:59 PM by Jan Goeman
Analysis Method : C:\HPCHEM\1\METHODS\CE\DEF_CE.M
Last changed    : 12/15/10 2:53:13 PM by Jan Goeman
Default Method  (no analysis)
=====

```

```

=====
                          Area Percent Report
=====

```

```

Sorted By           :      Signal
Area Calculation Mode : Measured Area
Multiplier          :      1.0000
Dilution           :      1.0000

```

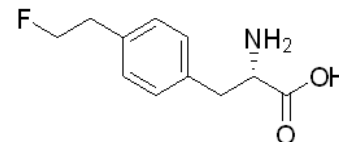

Signal 1: DAD1 B, Sig=214,20 Ref=off

| Peak # | Time [min] | Type | Width [min] | Area [mAU*s] | Height [mAU] | Area %  |                  |
|--------|------------|------|-------------|--------------|--------------|---------|------------------|
| 1      | 29.078     | MM   | 0.2730      | 9.27388      | 5.66264e-1   | 0.7491  |                  |
| 2      | 32.577     | MM   | 0.3840      | 1228.72766   | 53.33382     | 99.2509 | Analysis cpd. 15 |

Totals :                                    1238.00154    53.90008

Results obtained with enhanced integrator! (parabolic interpolation)

```

=====
*** End of Report ***
=====

```

Injection Date : 4/18/18 11:03:41 PM      Seq. Line : 6  
 Sample Name : 20      Location : Vial 38  
 Acq. Operator : Jan Goeman      Inj : 1  
 Sequence File : C:\HPCHEM\1\SEQUENCE\TEMP.S  
 Method : C:\HPCHEM\1\METHODS\CE\01-40N20.M  
 Last changed : 5/11/11 3:19:59 PM by Jan Goeman  
 CE met buffer 1  
 L=64.5 cm / d=200 um / pH 2.5 / 25 mM / SDS 1 mM / 15 y.CD 5 %

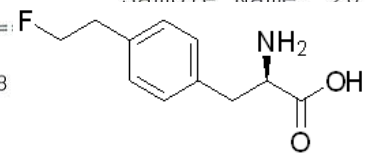

16

Sample: cpd. 16

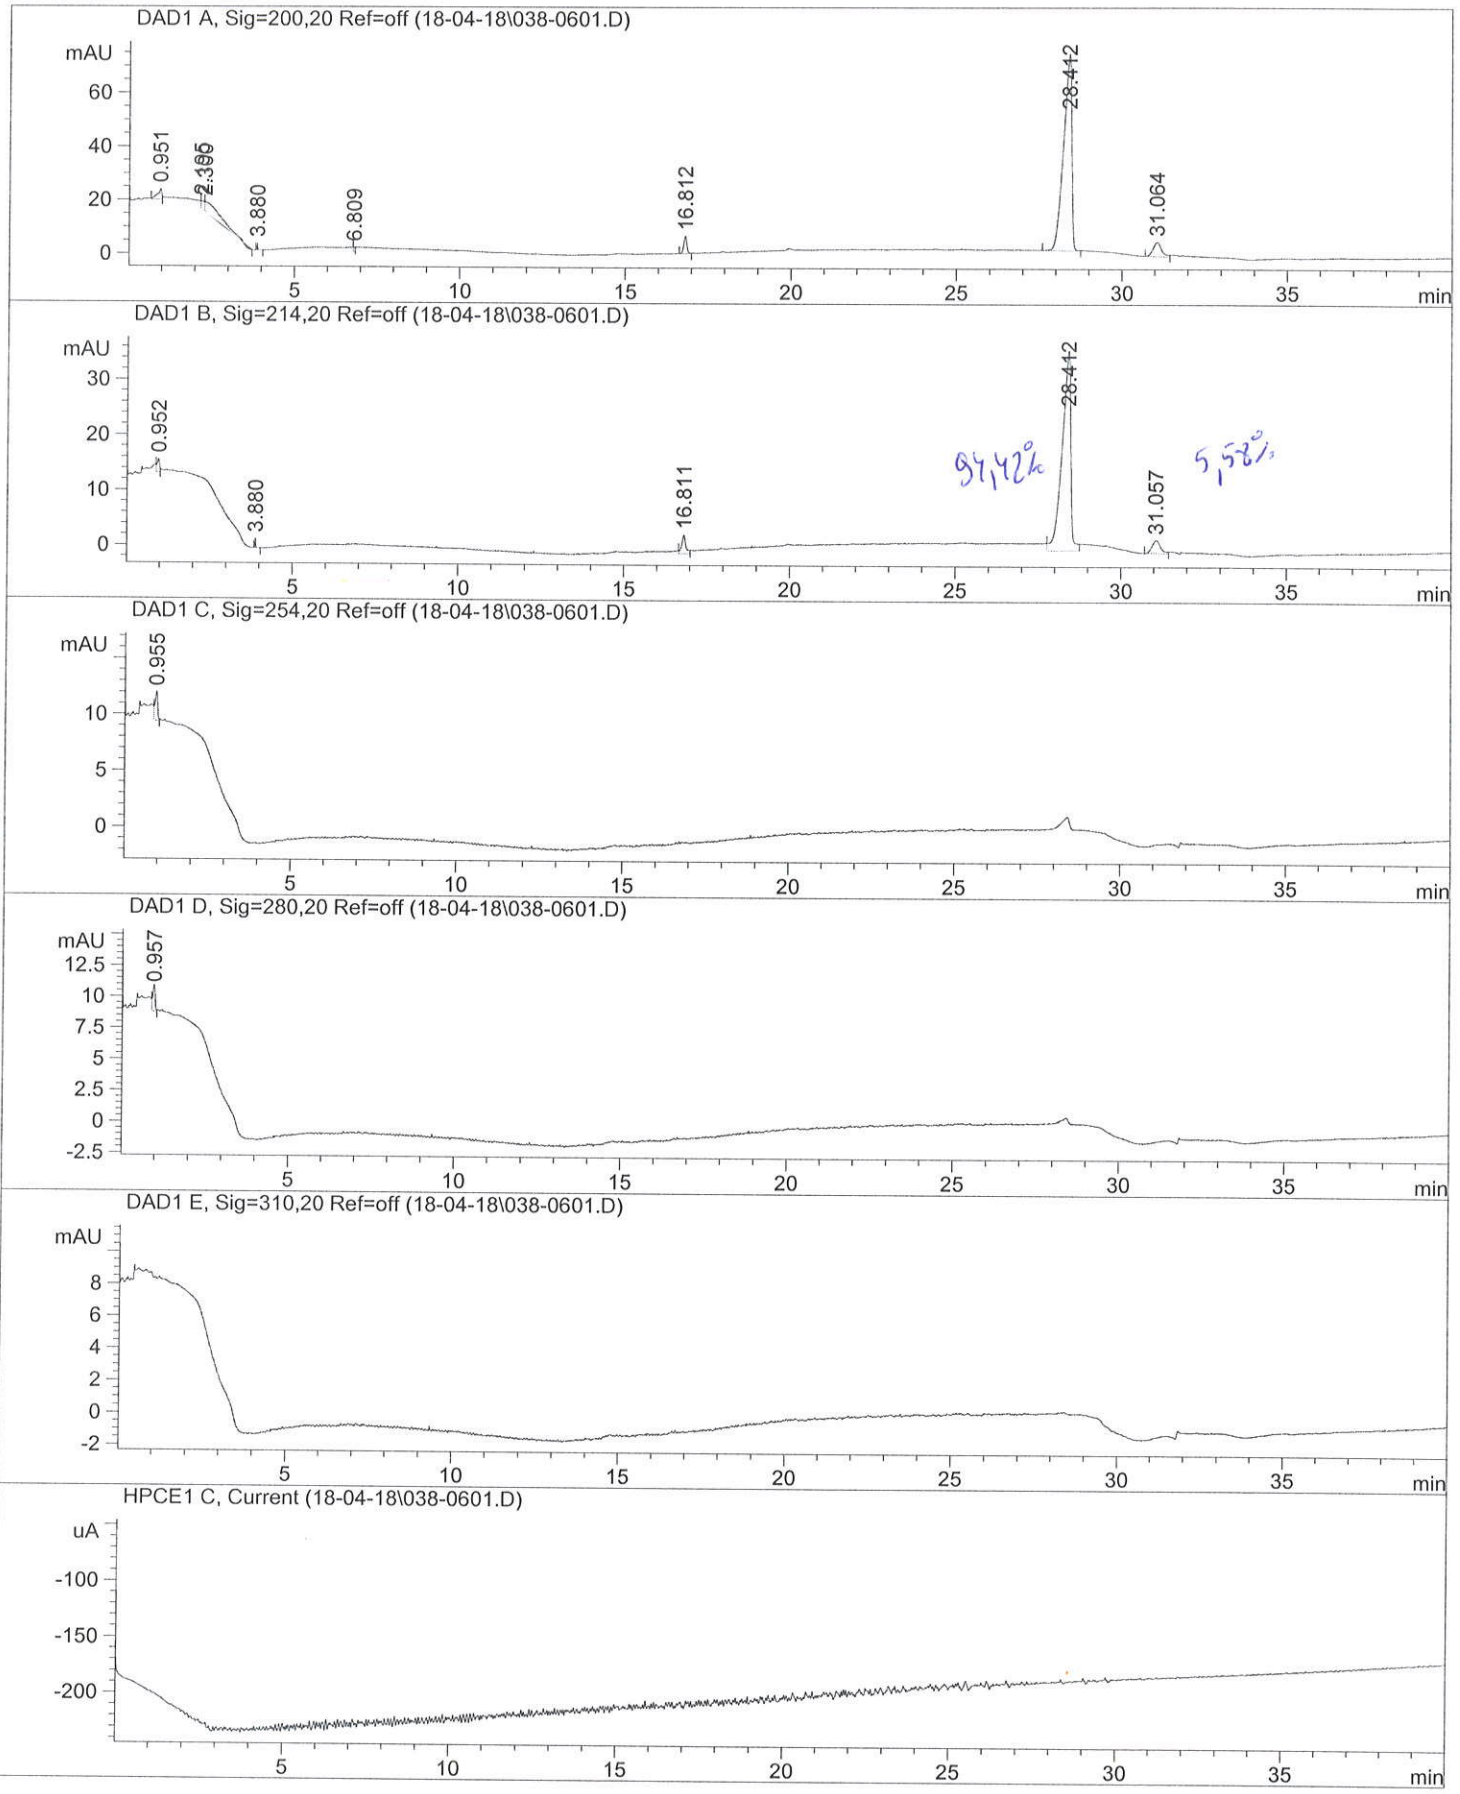

Current Electropherogram(s)

DAD1 B, Sig=214,20 Ref=off (18-04-18\038-0601.D)

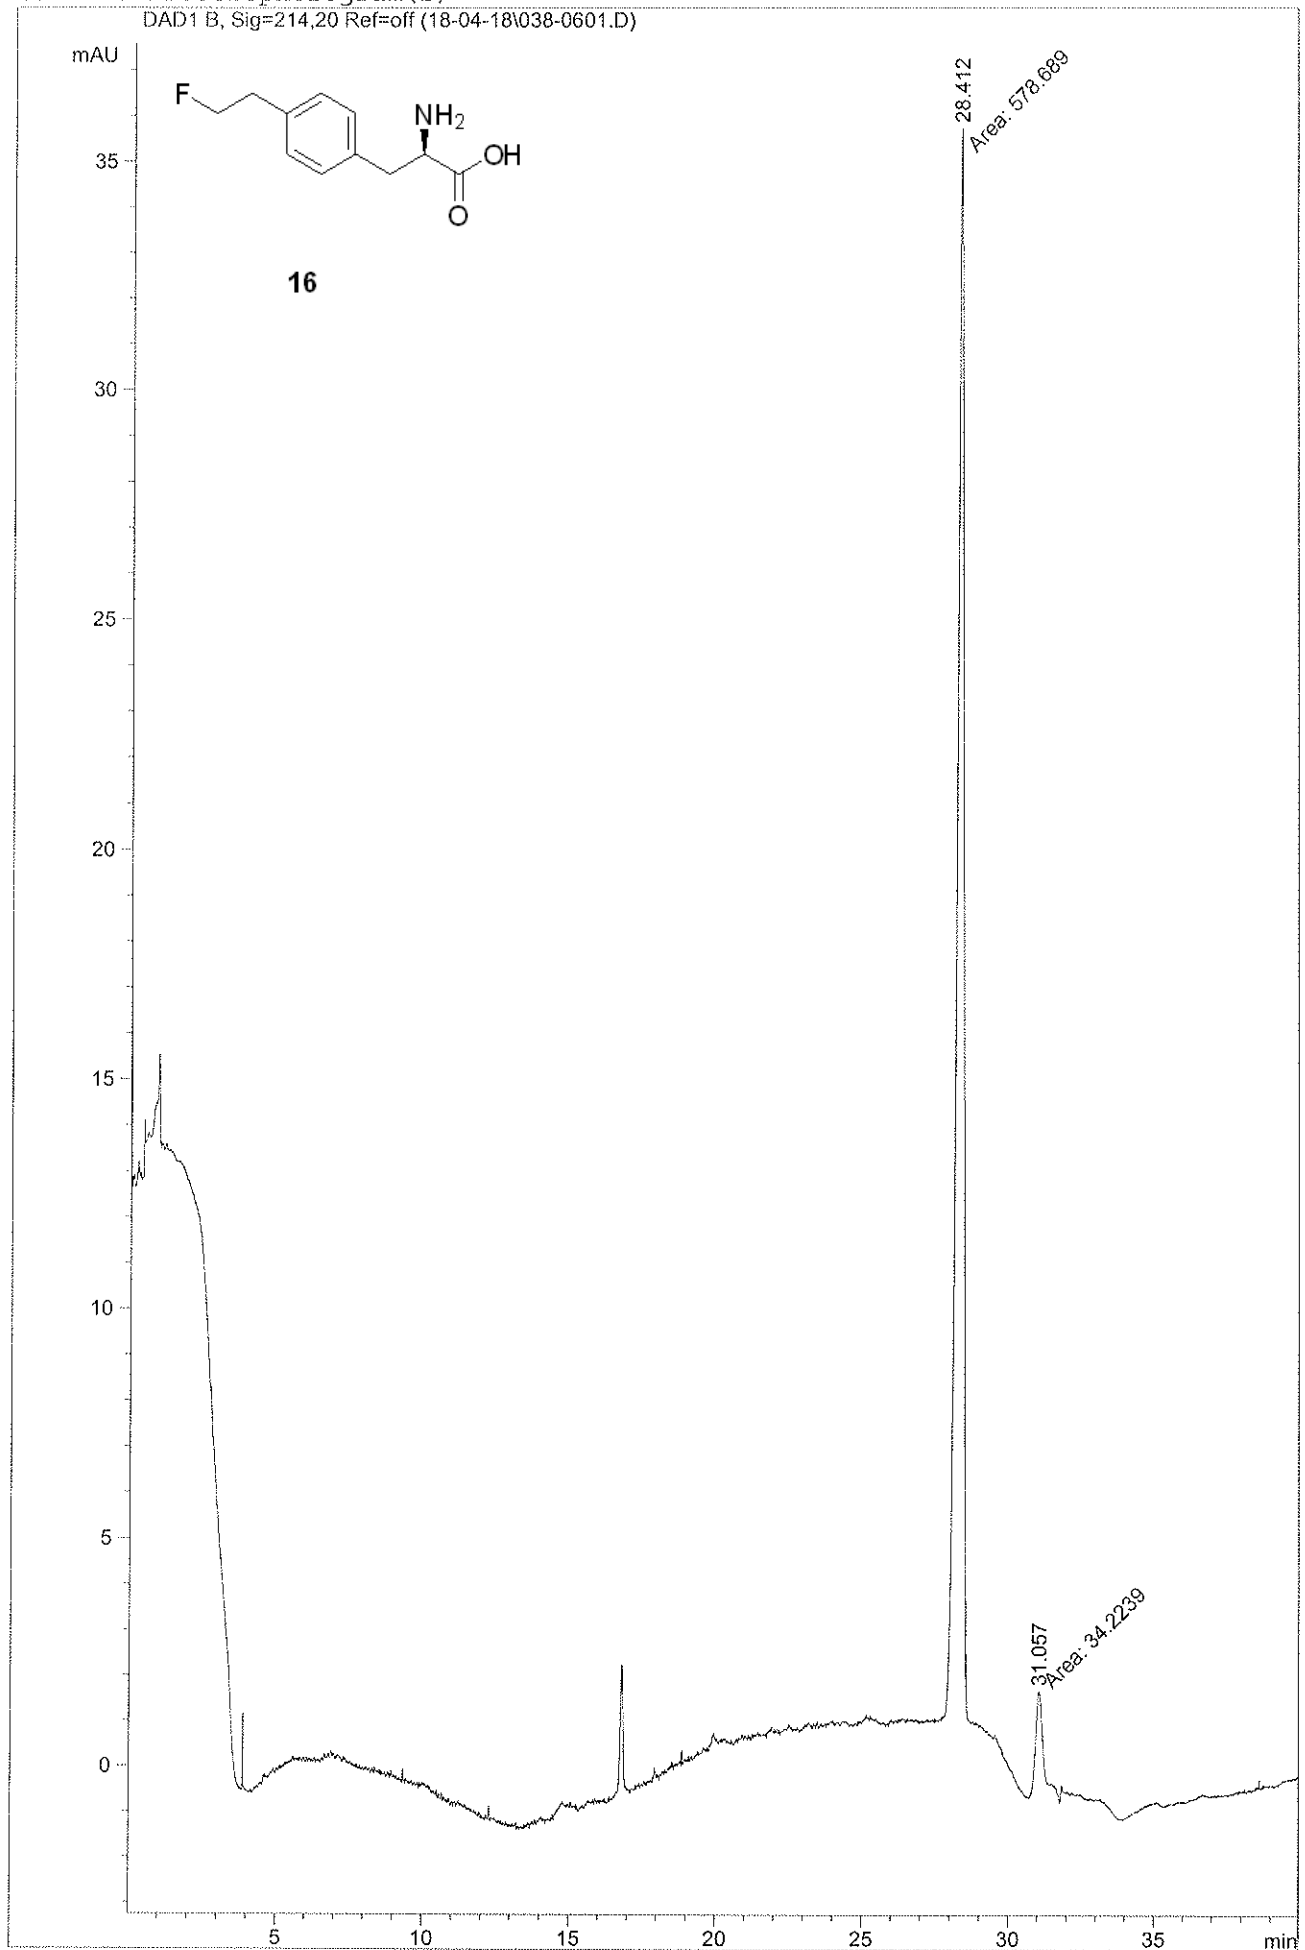

```

=====
Injection Date   : 4/18/18 11:03:41 PM          Seq. Line :    6
Sample Name     : 20                          Location  : Vial 38
Acq. Operator   : Jan Goeman                  Inj       :    1
Acq. Method     : C:\HPCHEM\1\METHODS\CE\01-40N20.M
Last changed    : 5/11/11 3:19:59 PM by Jan Goeman
Analysis Method : C:\HPCHEM\1\METHODS\CE\DEF_CE.M
Last changed    : 12/15/10 2:53:13 PM by Jan Goeman
Default Method  (no analysis)
=====

```

```

=====
                          Area Percent Report
=====

```

```

Sorted By           :      Signal
Area Calculation Mode :      Measured Area
Multiplier          :      1.0000
Dilution            :      1.0000

```

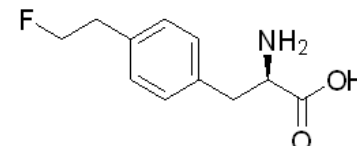**16**

Analysis cpd. 16

Signal 1: DAD1 B, Sig=214,20 Ref=off

| Peak # | Time [min] | Type | Width [min] | Area [mAU*s] | Height [mAU] | Area %  |
|--------|------------|------|-------------|--------------|--------------|---------|
| 1      | 28.412     | MM   | 0.2778      | 578.68945    | 34.71428     | 94.4162 |
| 2      | 31.057     | MM   | 0.2610      | 34.22391     | 2.18517      | 5.5838  |

```
Totals :                      612.91336   36.89945
```

```
Results obtained with enhanced integrator! (parabolic interpolation)
```

```
=====
*** End of Report ***
```

## Chiral purity analysis of compound **17** & **18**

Chromatographic conditions for **17** & **18**:

Chiral capillary electrophoresis (CE) employed a 64.5 cm capillary (50  $\mu\text{m}$  diameter). The electrolyte used consisted of 25 mM phosphate buffer pH 2.5 + 5% HS-gammaCD chiral modifier. Analysis time was 40 min at -20 kV.

Injection Date : 4/19/18 11:47:57 PM  
 Sample Name : 29+31  
 Acq. Operator : Jan Goeman  
 Sequence File : C:\HPCHEM\1\SEQUENCE\TEMP.S  
 Method : C:\HPCHEM\1\METHODS\CE\01-40N20.M  
 Last changed : 5/11/11 3:19:59 PM by Jan Goeman  
 CE met buffer 1

Seq. L  
 Locat

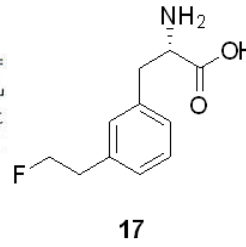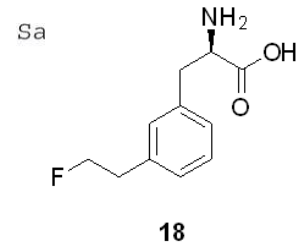

L=6.45 cm / d=.50 um / pH.2.5 .25 mM / SDS. . . . mM / .15% CD . . . . %

Optimization of chiral CE  
 Sample: cpd. 17 & 18

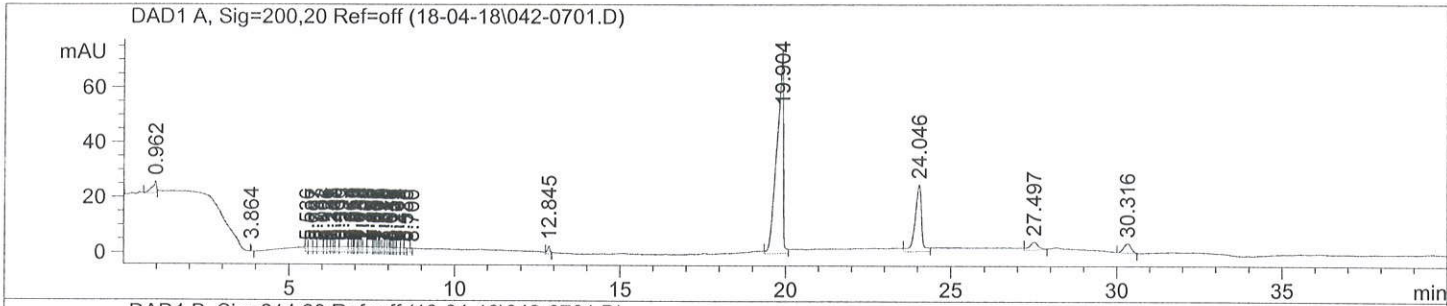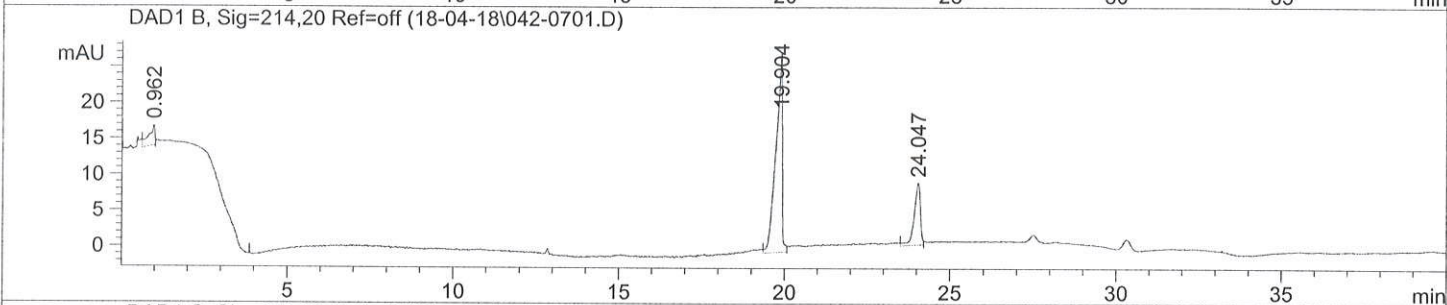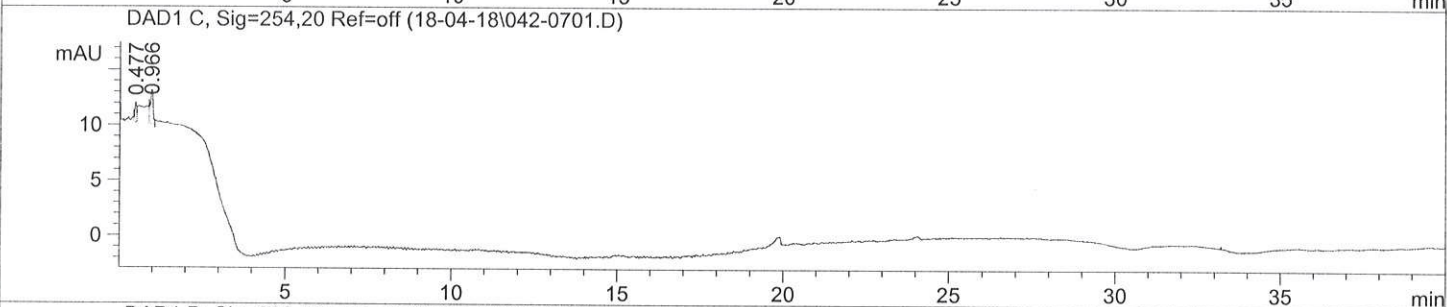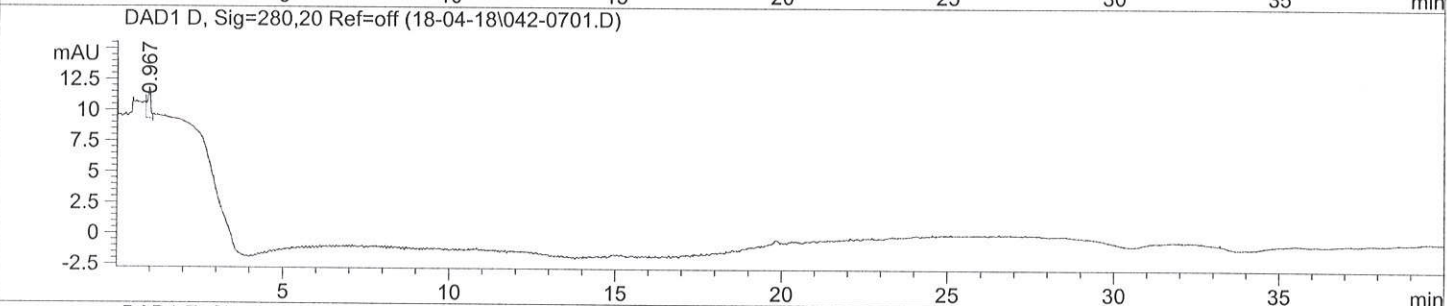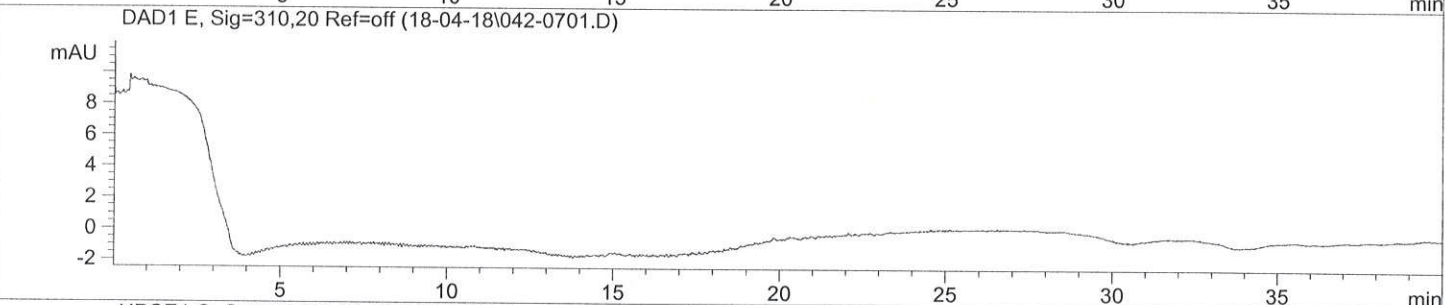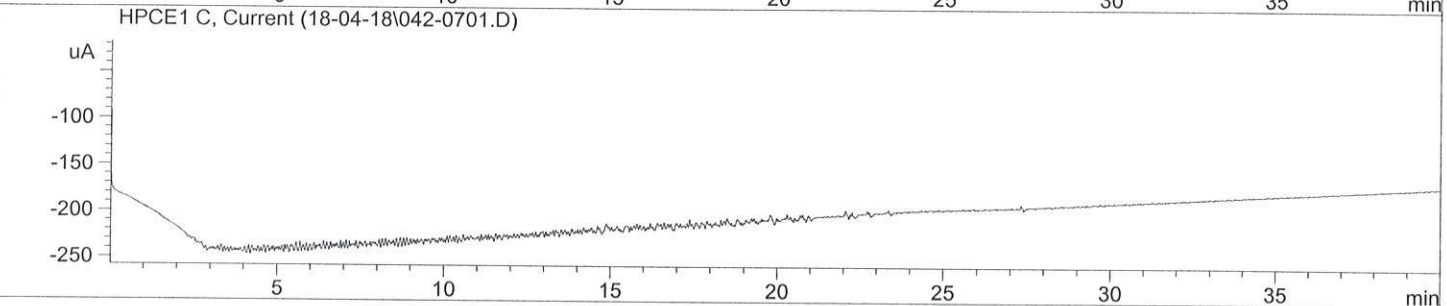

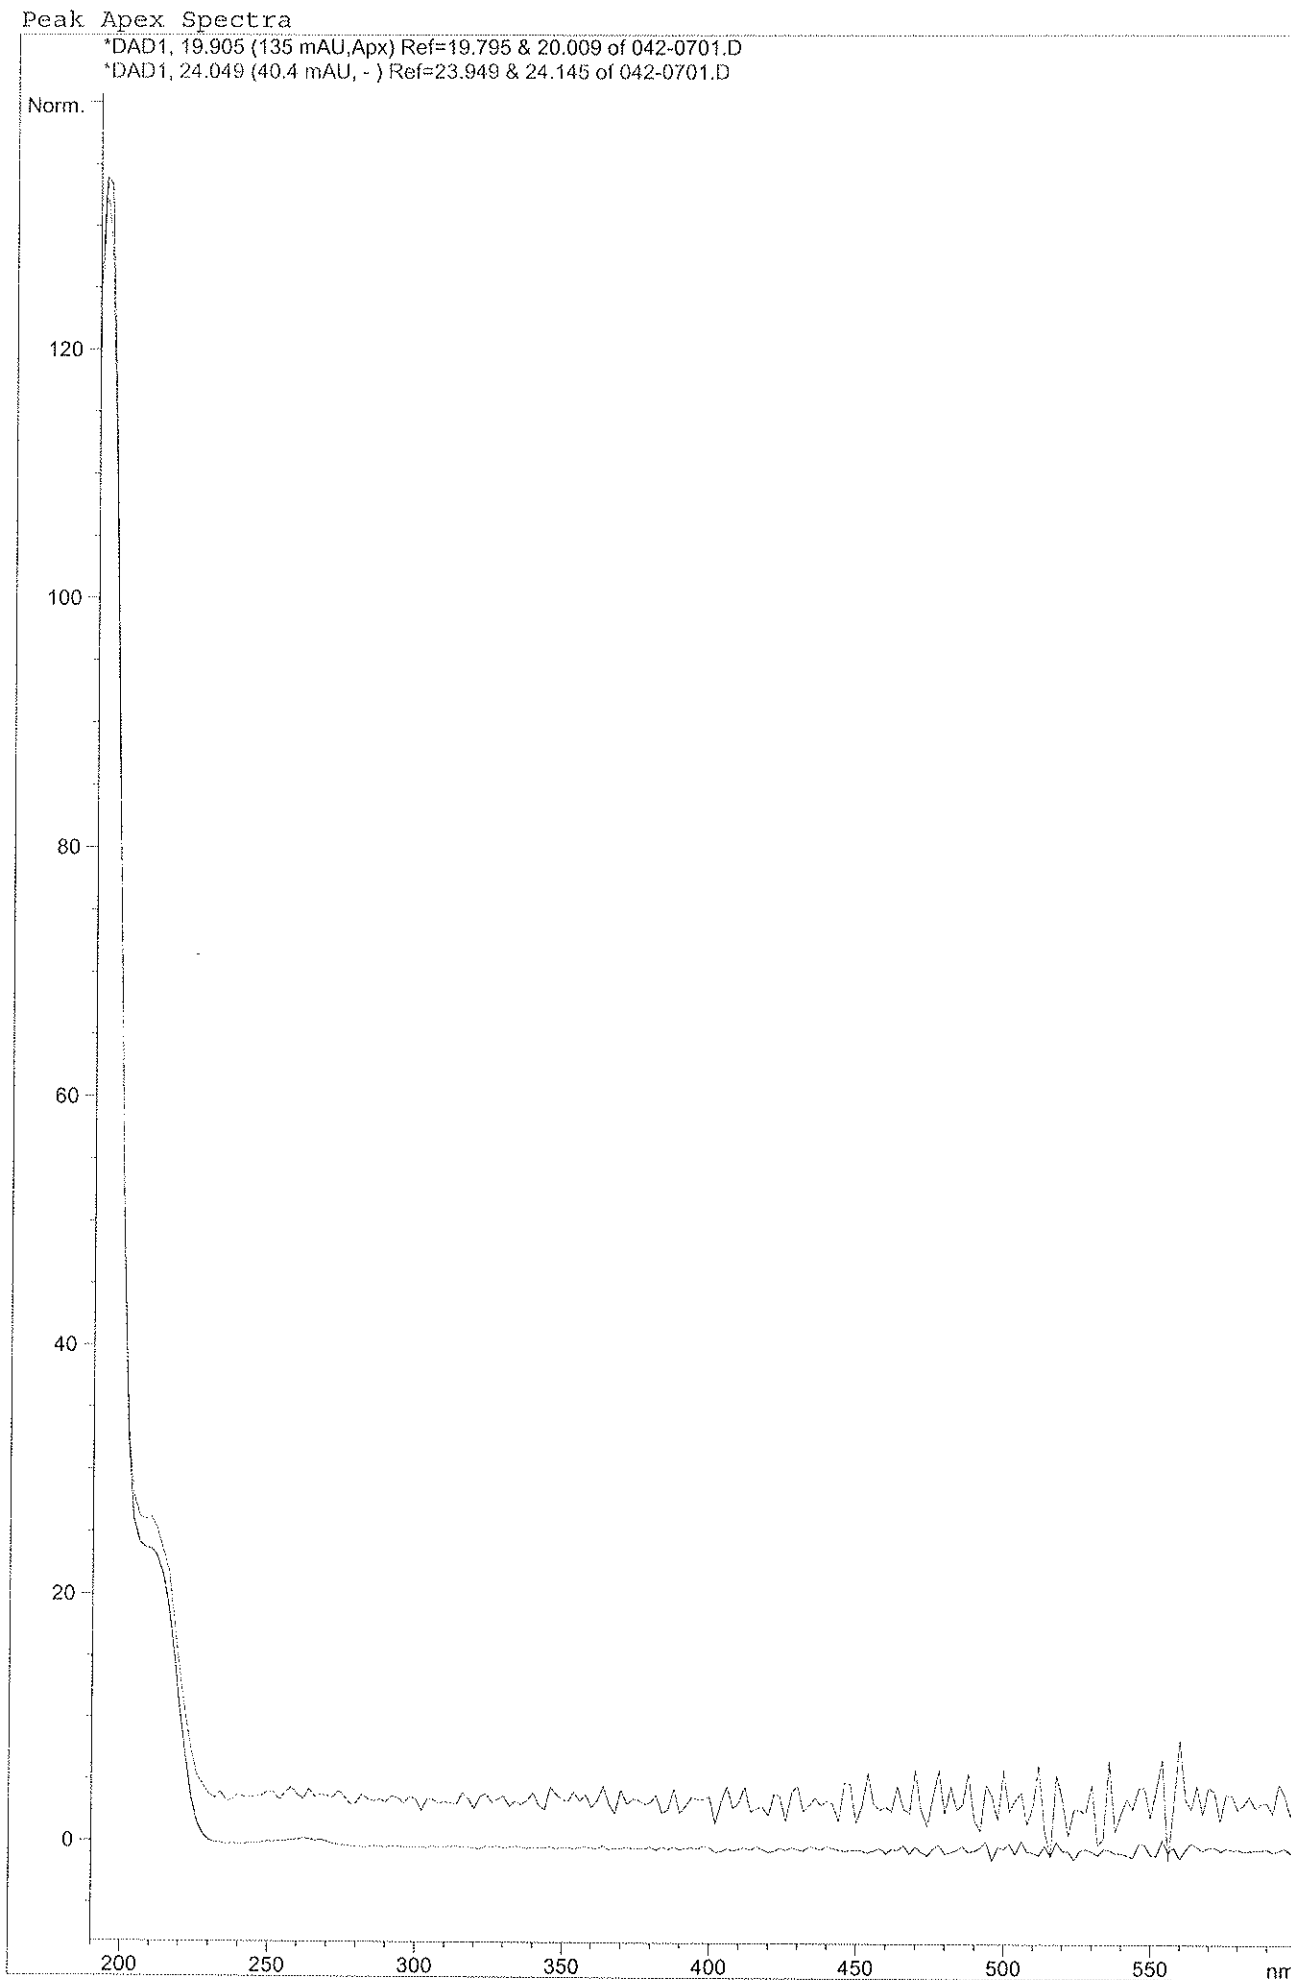

Injection Date : 4/19/18 12:32:19 AM      Seq. Line : 8  
 Sample Name : 29      Location : Vial 40  
 Acq. Operator : Jan Goeman      Inj : 1  
 Sequence File : C:\HPCHEM\1\SEQUENCE\TEMP.S  
 Method : C:\HPCHEM\1\METHODS\CE\01-40N20.M  
 Last changed : 5/11/11 3:19:59 PM by Jan Goeman  
 CE met buffer 1  
 L= .646 cm / d= .52 um / pH= 2.5 / 25 mM / SDS . . . mM / 115 y.CD . . . %

CE analysis  
 Sample: cpd. 17

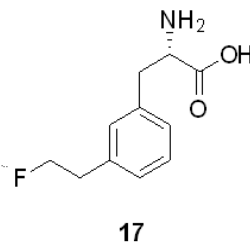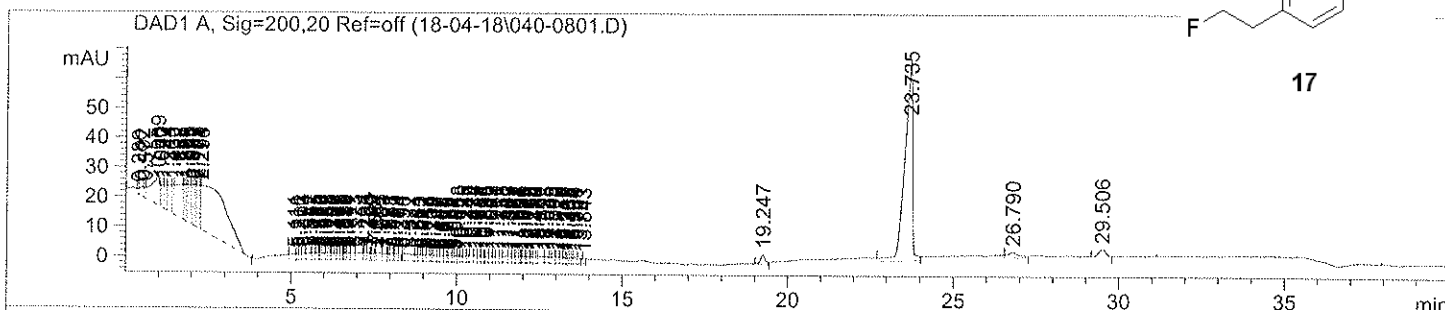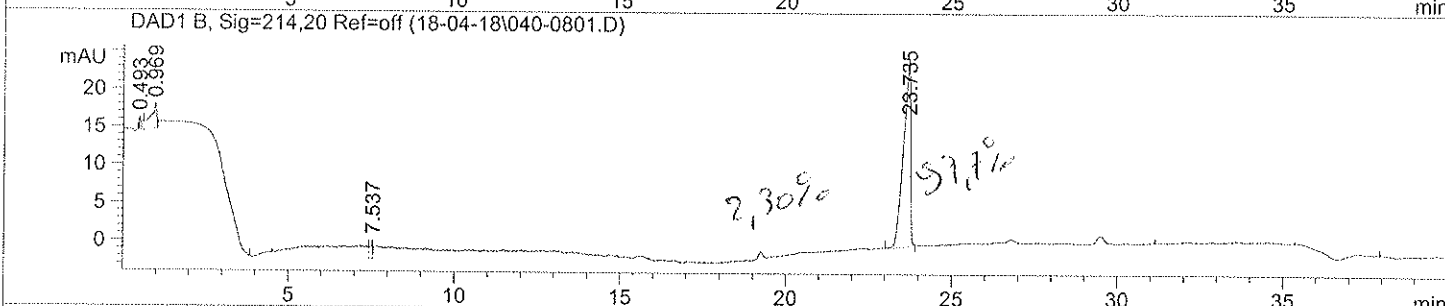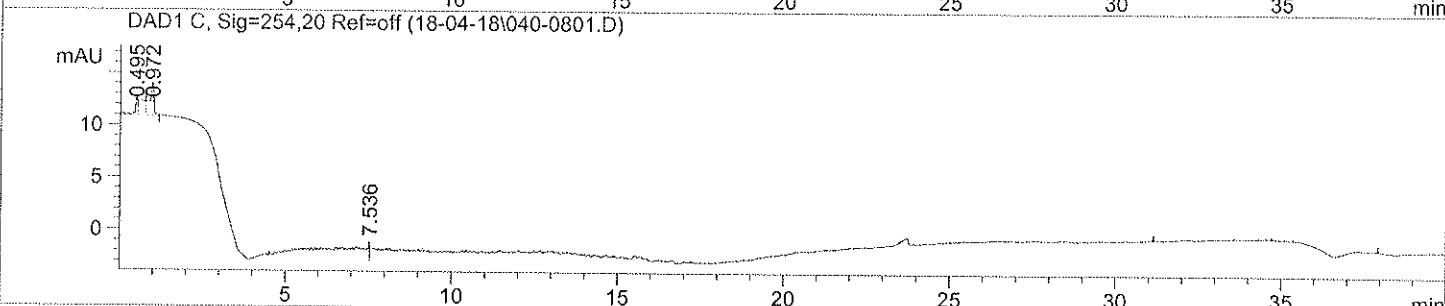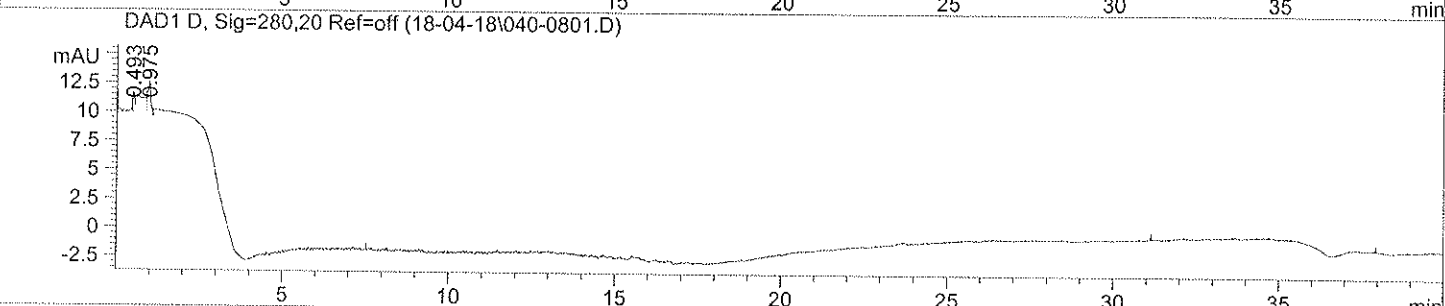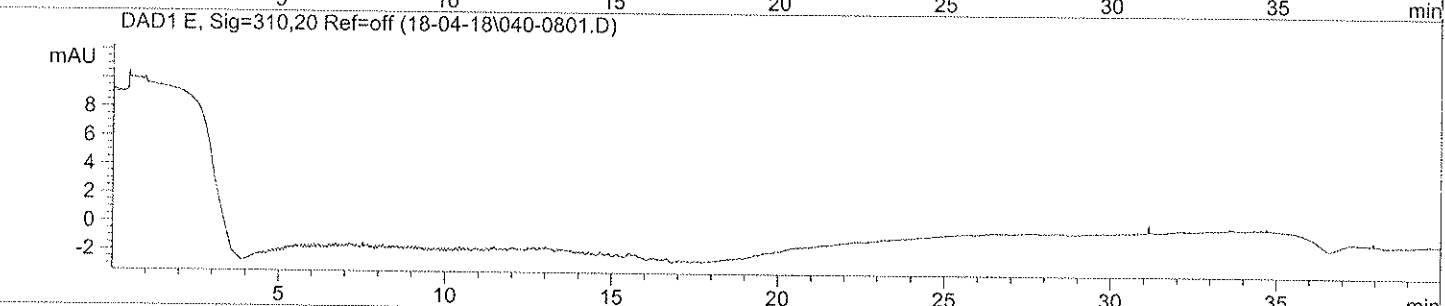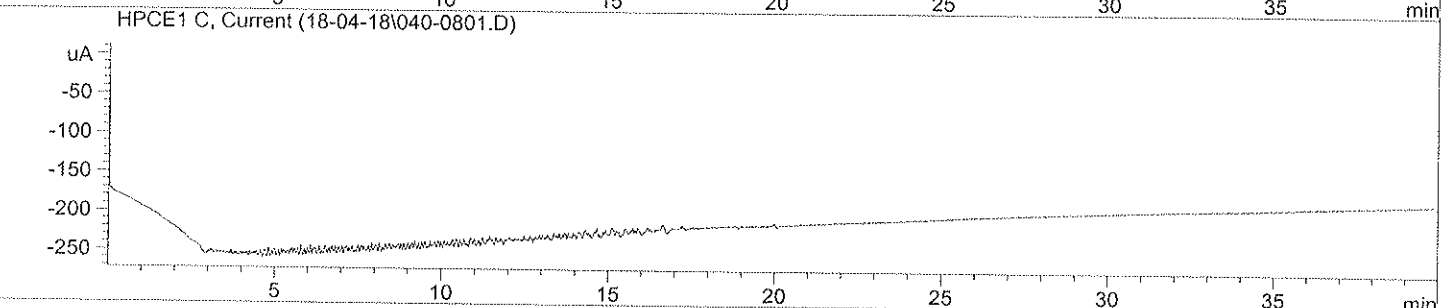



Current Electropherogram(s)

DAD1 B, Sig=214,20 Ref=off (18-04-18\040-0801.D)

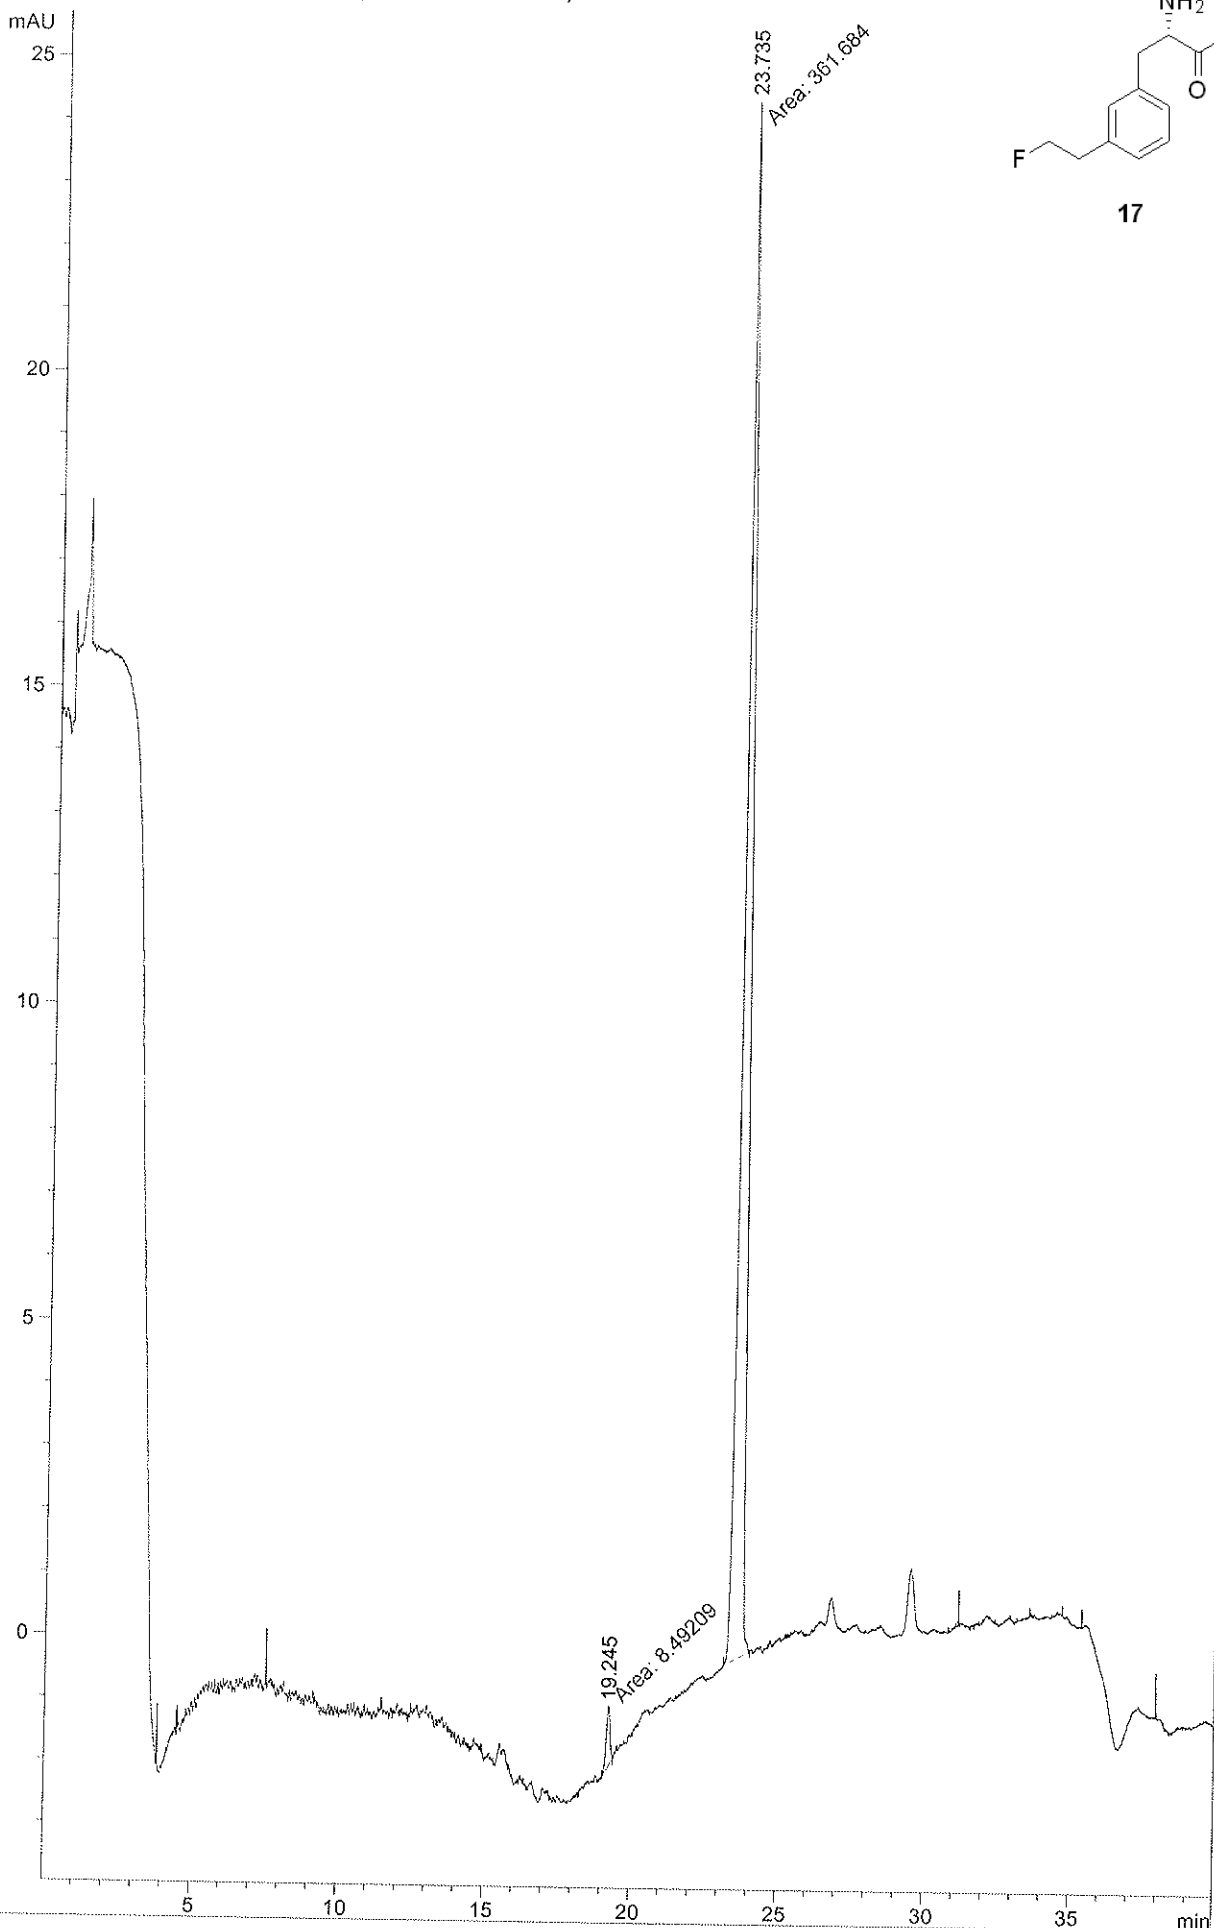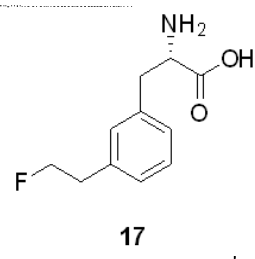



```

=====
Injection Date : 4/19/18 1:16:34 AM          Seq. Line : 9
Sample Name    : 30                          Location  : Vial 41
Acq. Operator  : Jan Goeman                  Inj      : 1
Sequence File  : C:\HPCHEM\1\SEQUENCE\TEMP.S
Method         : C:\HPCHEM\1\METHODS\CE\01-40N20.M
Last changed   : 5/11/11 3:19:59 PM by Jan Goeman
CE met, buffer 1
L=64.5 cm / d=50.0 um / pH 7.1 / 2.5 mM / SDS 1.0 mM / K2S2O8 0.5 mM
=====
    
```

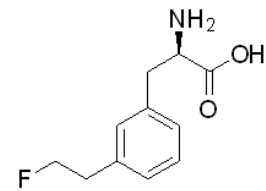

18

Chiral CE analysis  
Sample: cpd. 18

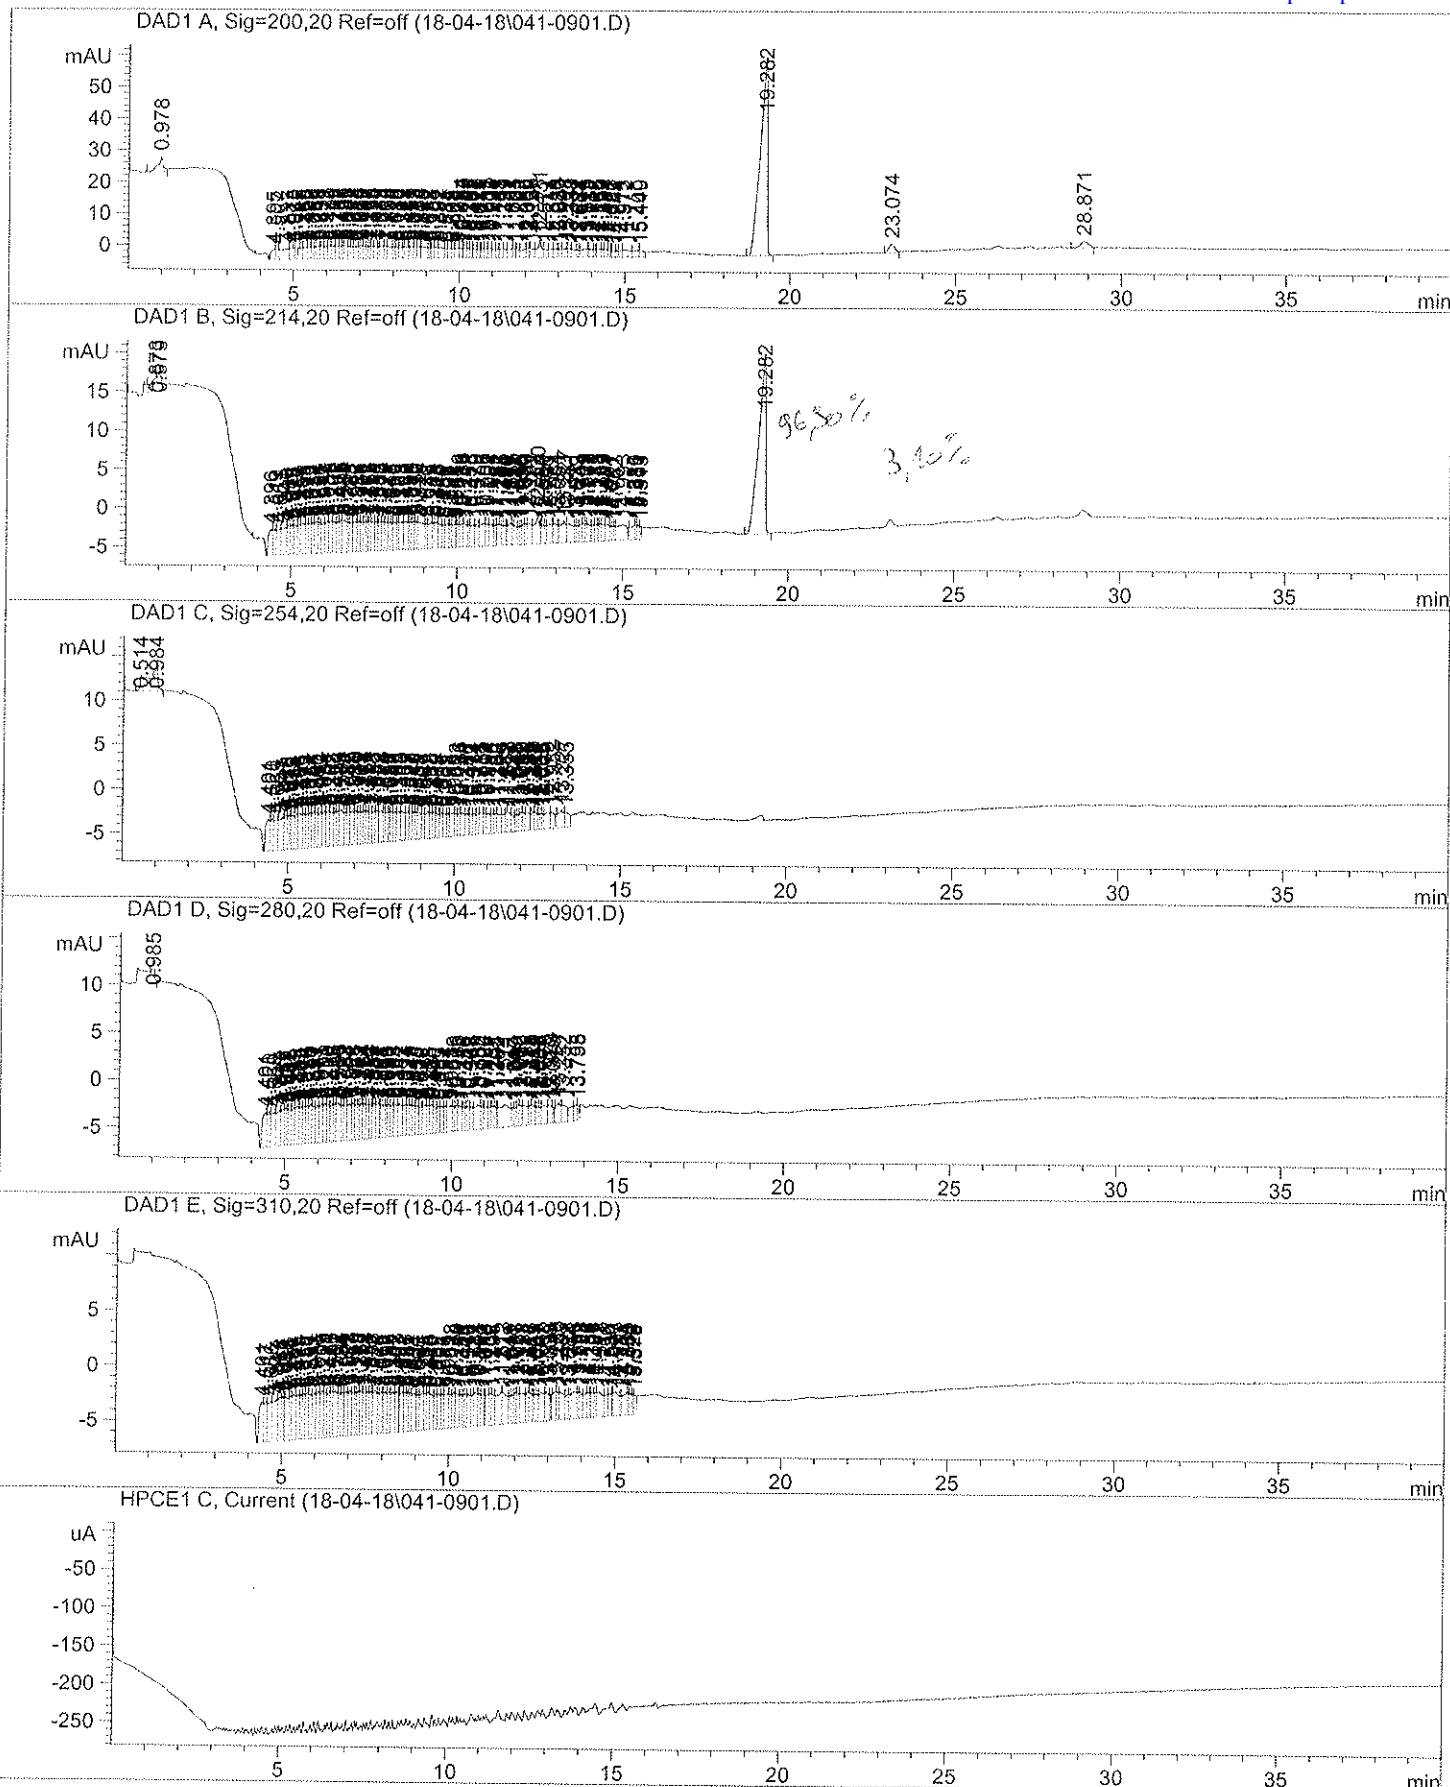

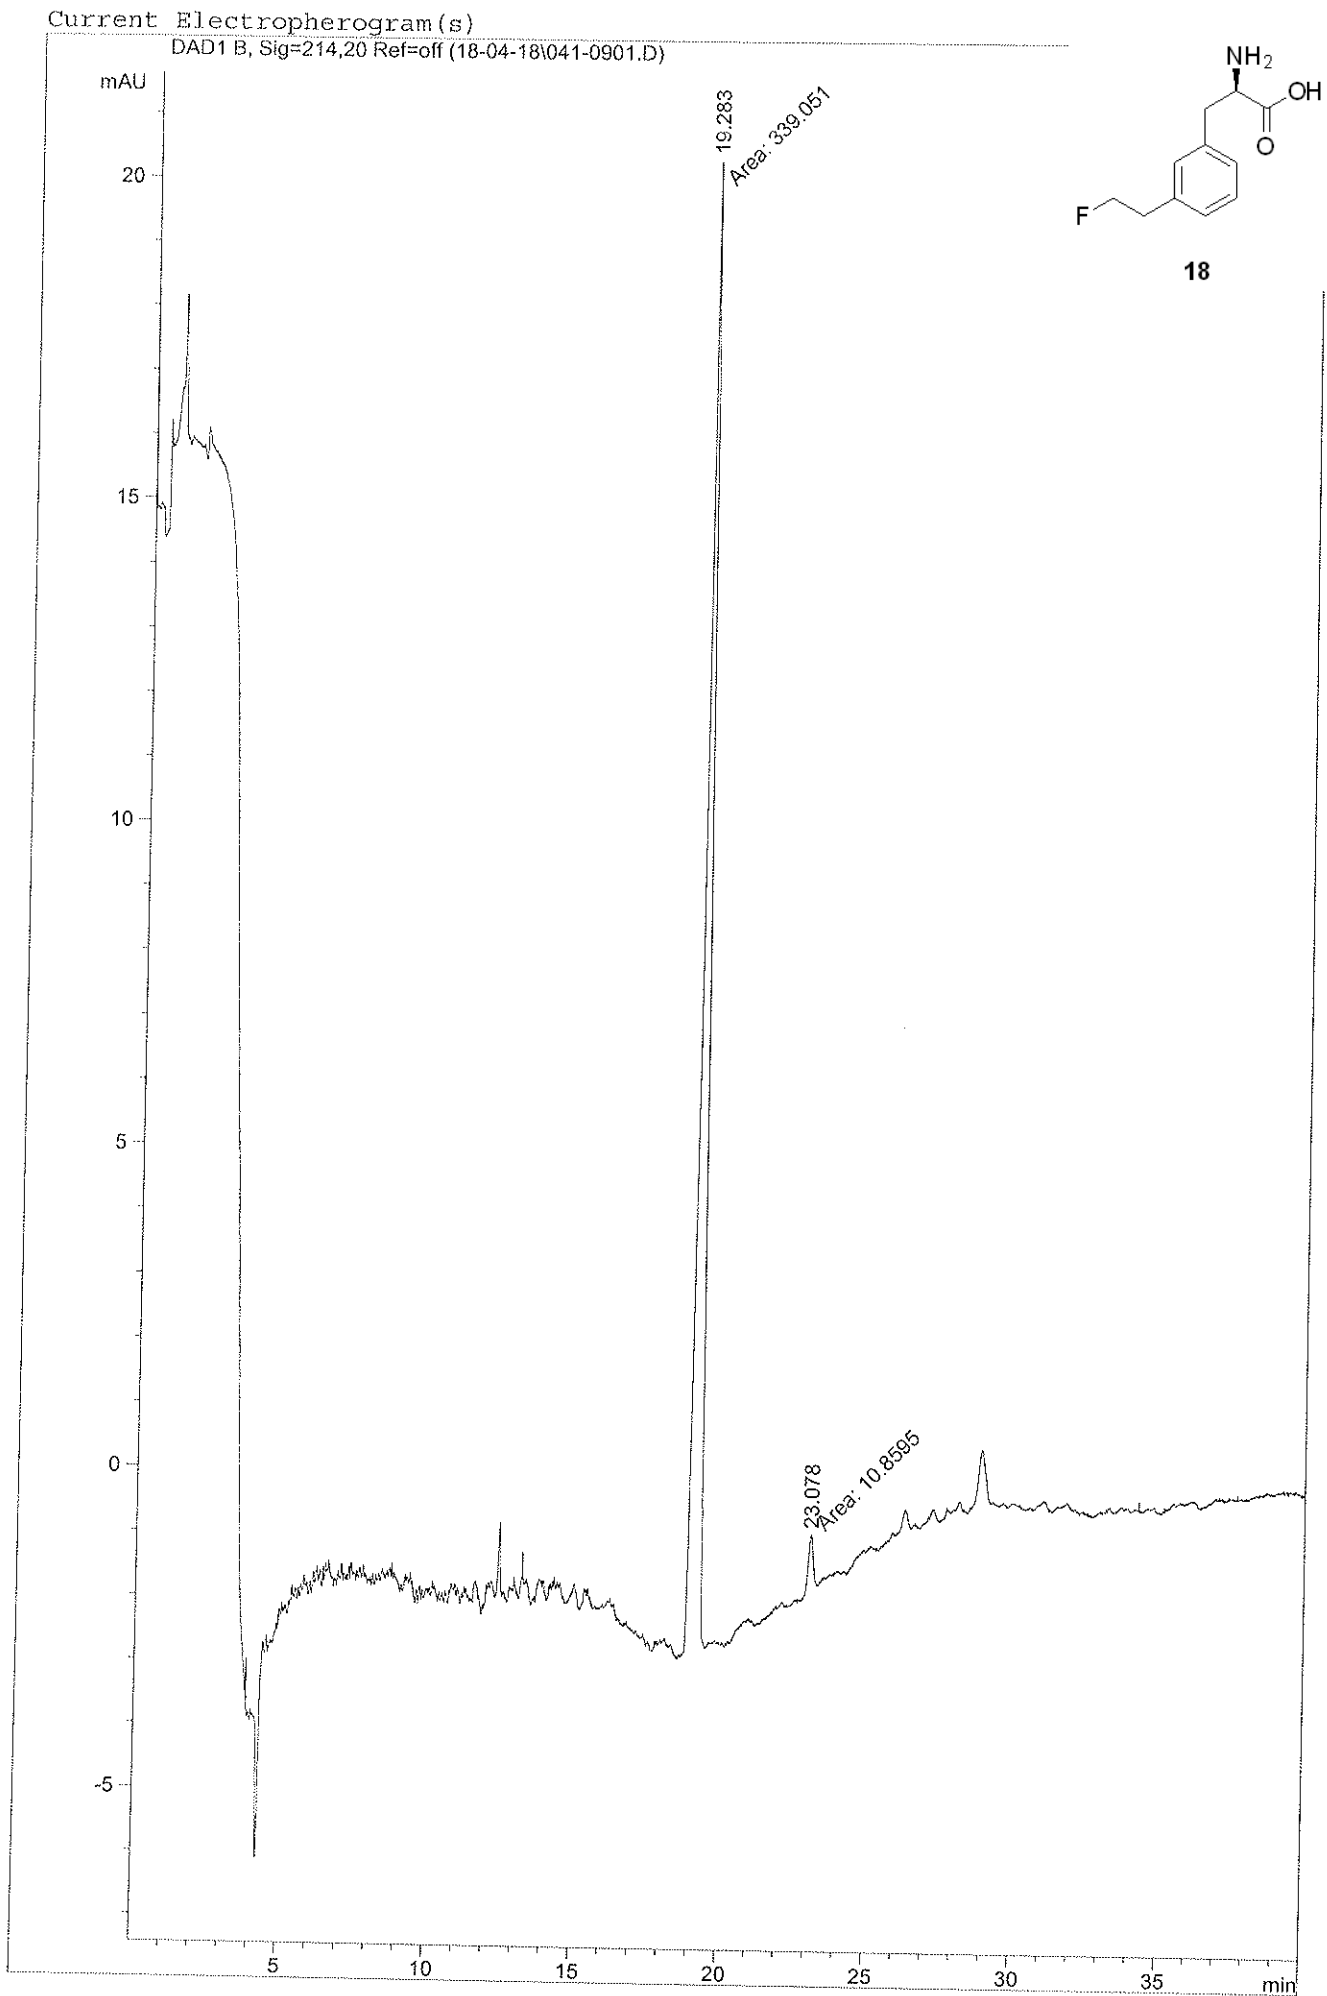



## Chiral purity analysis of compound **32** & **33**

Chromatographic conditions for **32** & **33**:

Astec® Chirobiotic-T column, 125 x 4.6 mm, particle size 5 µm. Column temperature was regulated at ambient temperature. The chromatographic run was performed isocratically with a mixture of EtOH/water (8/2) at a flow rate of 1 mL/min.

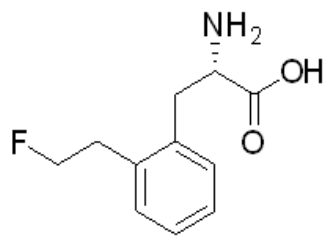

**32**

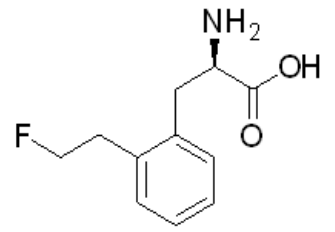

**33**

Chiral HPLC optimization of compound 32 & 33

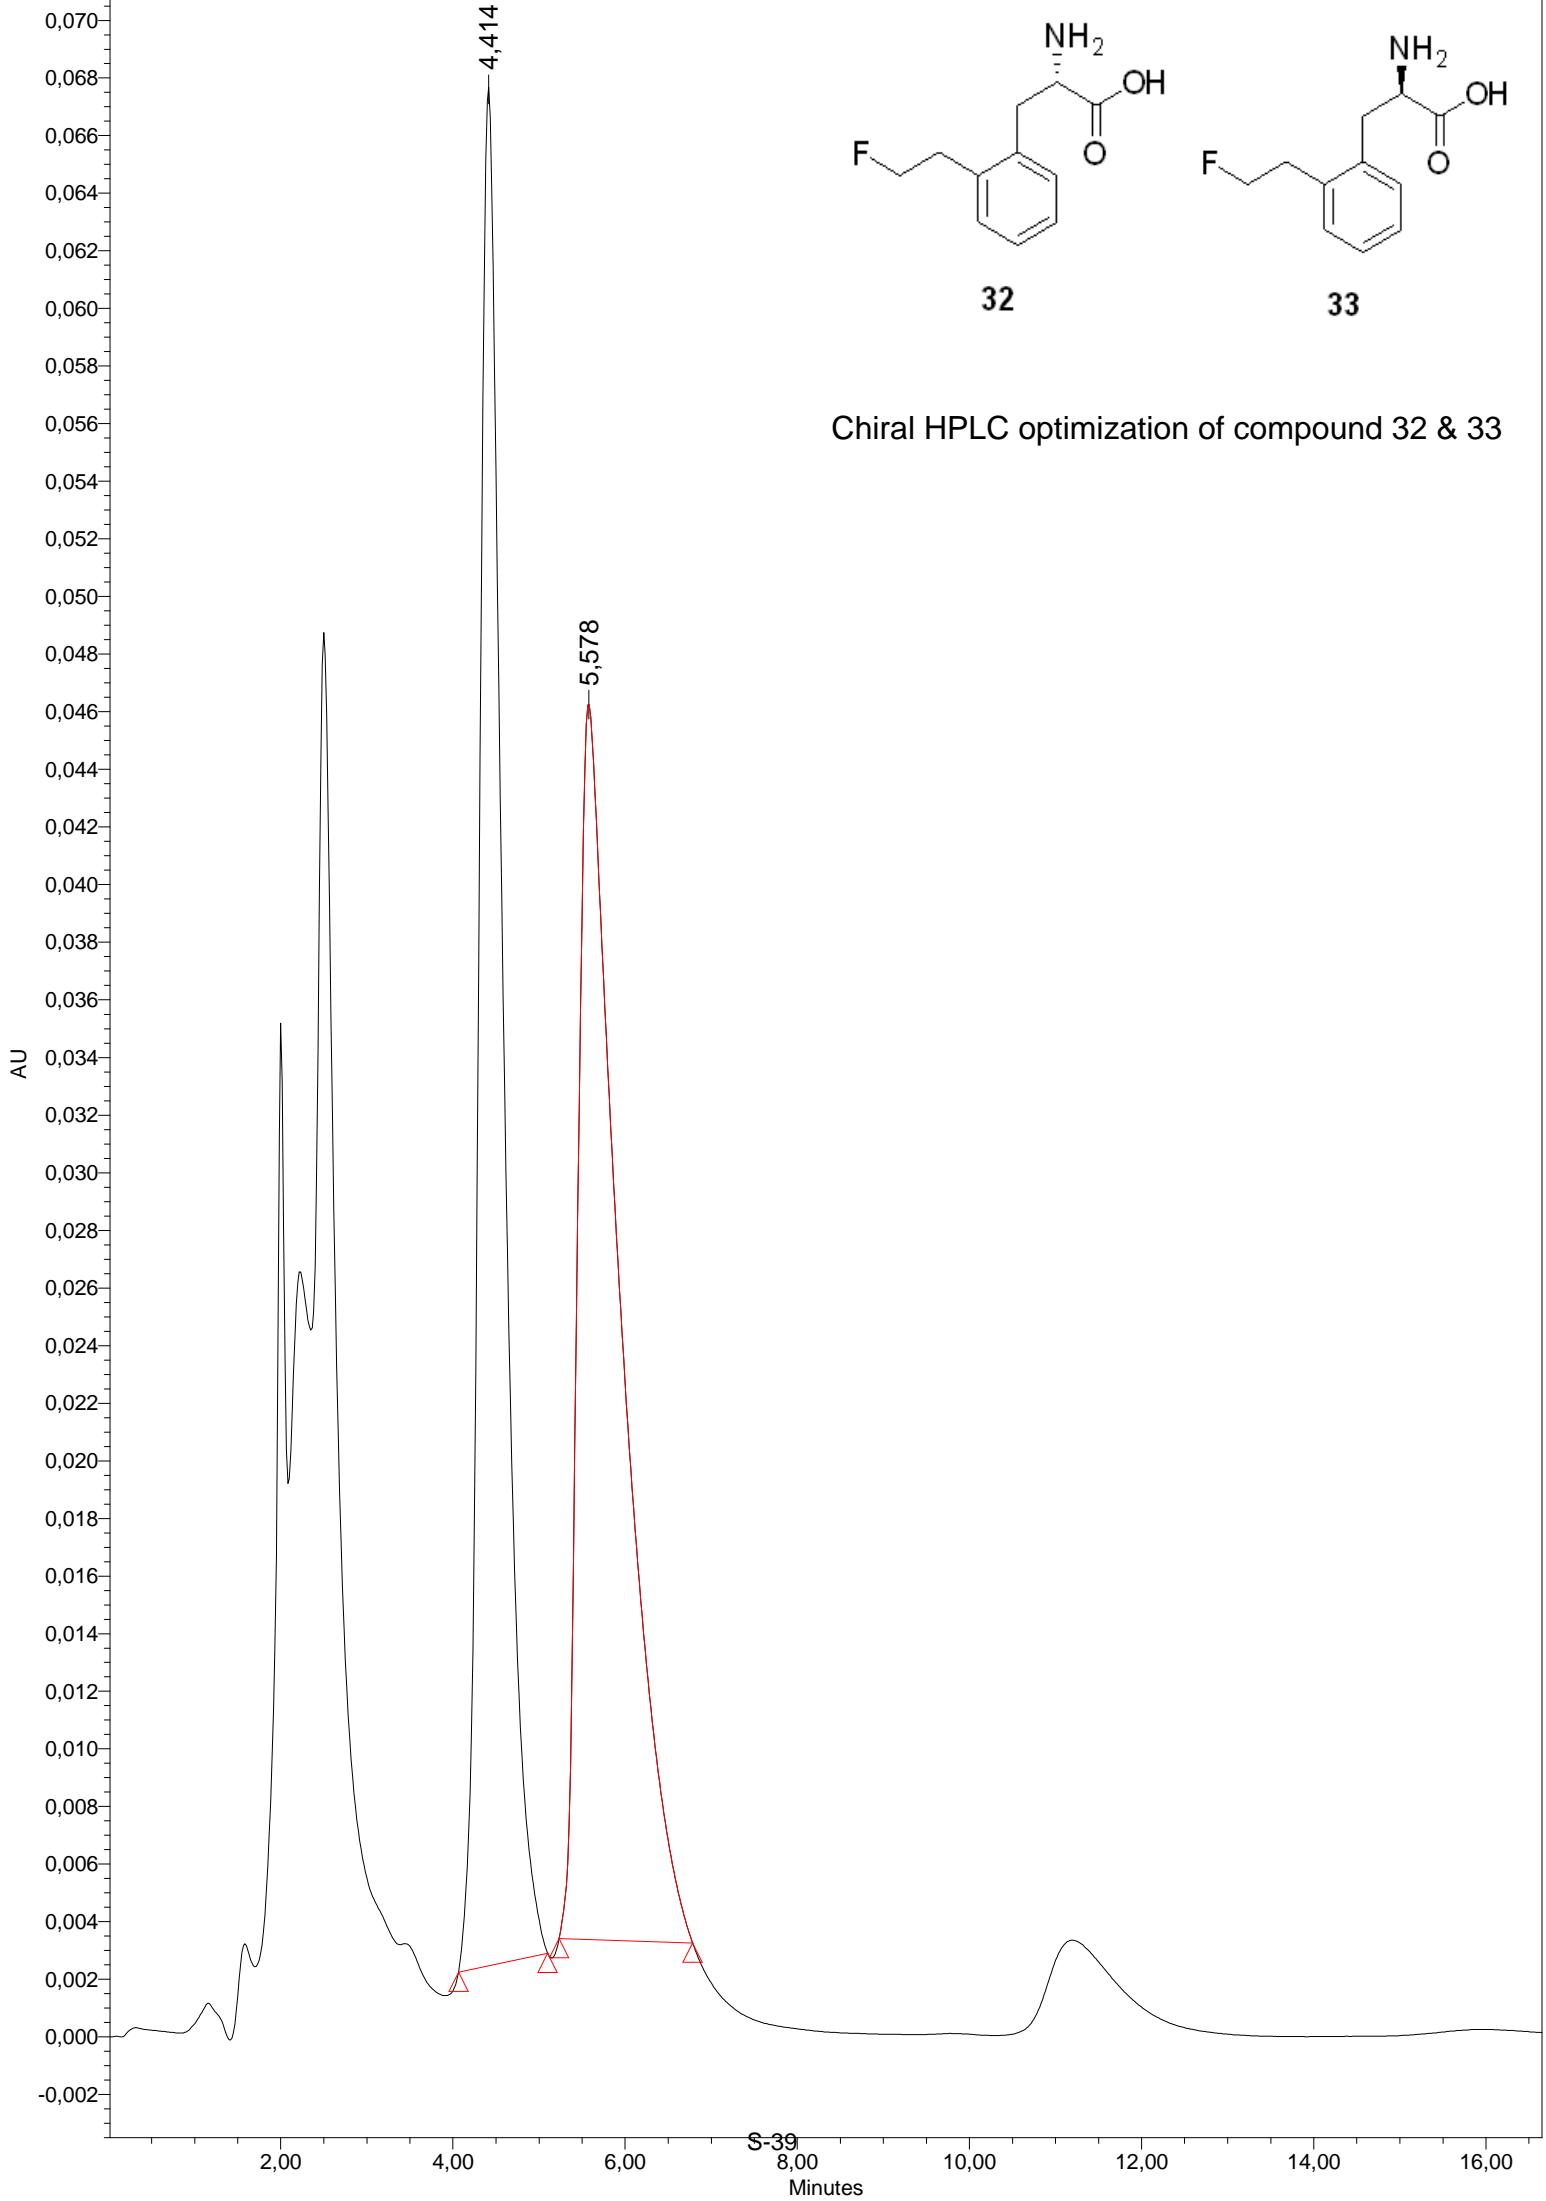

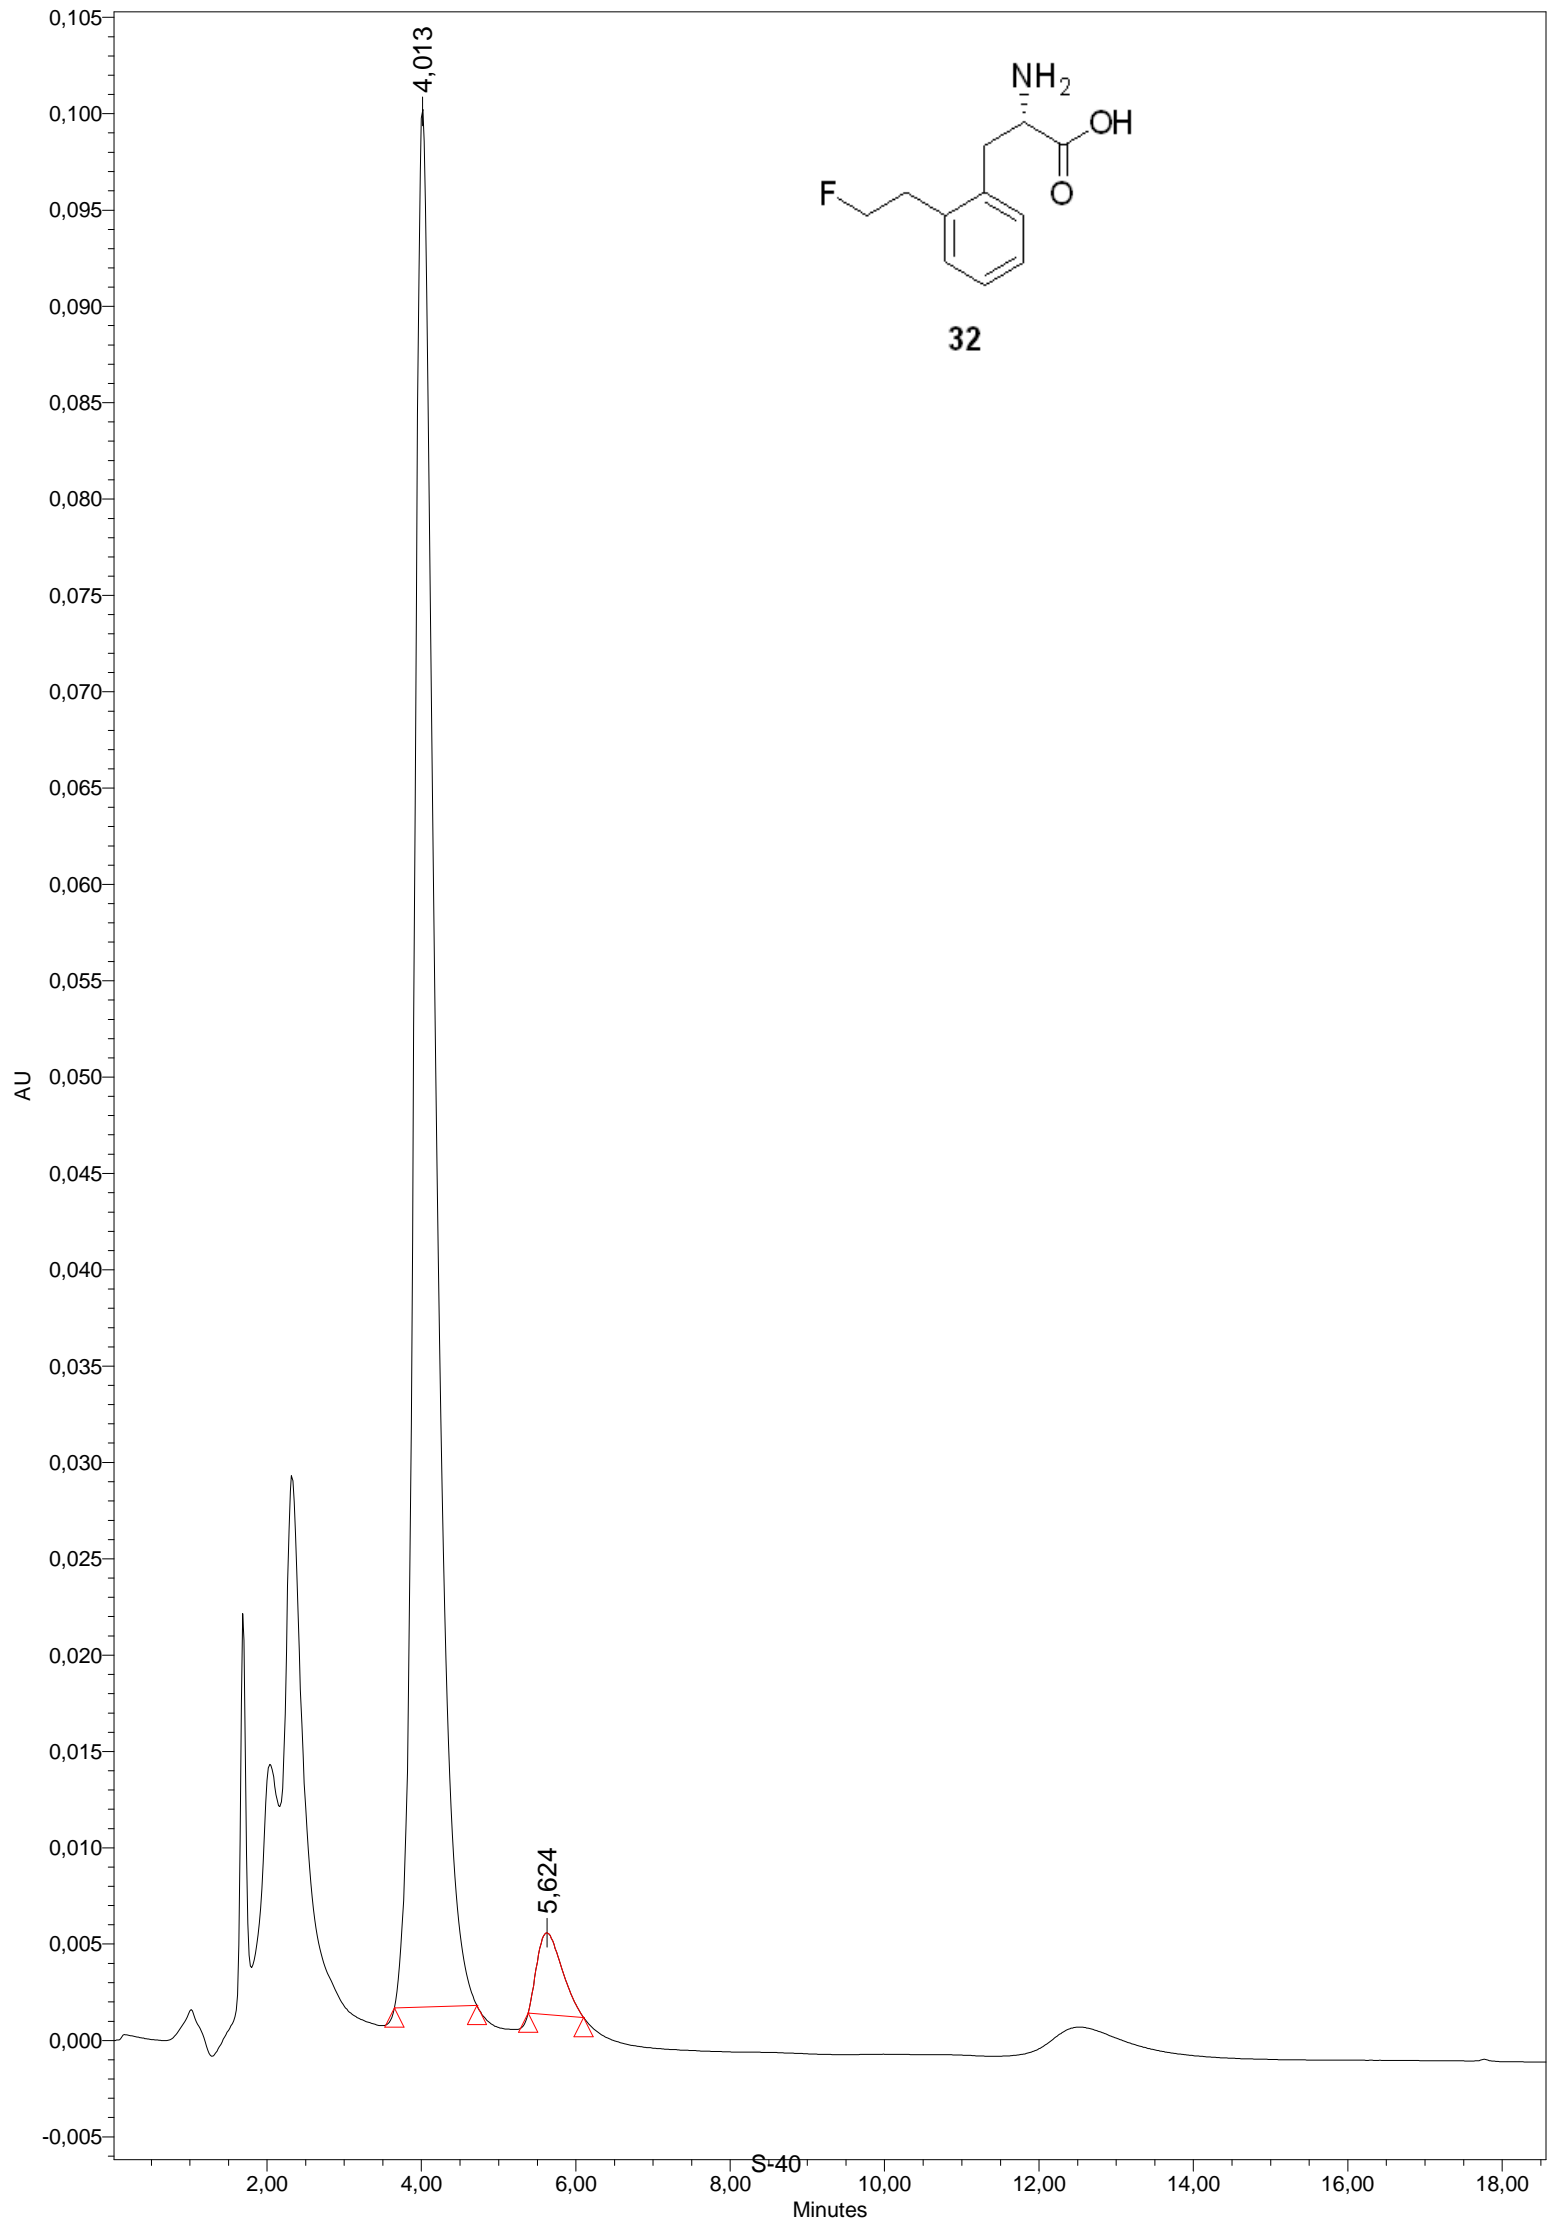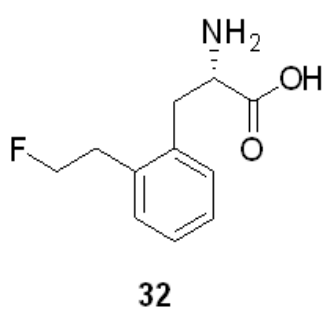



| Name | Retention Time (min) | Area ( $\mu\text{V}\cdot\text{sec}$ ) | % Area | Height ( $\mu\text{V}$ ) | Int Type | Amount | Units | Peak Type | Peak Codes |
|------|----------------------|---------------------------------------|--------|--------------------------|----------|--------|-------|-----------|------------|
| 1    | 4,013                | 1896688                               | 95,21  | 98536                    | bb       |        |       | Unknown   |            |
| 2    | 5,624                | 95519                                 | 4,79   | 4250                     | bb       |        |       | Unknown   |            |

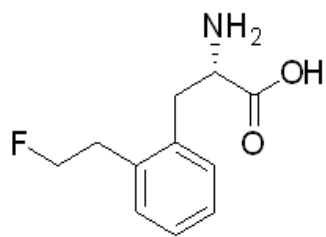

32

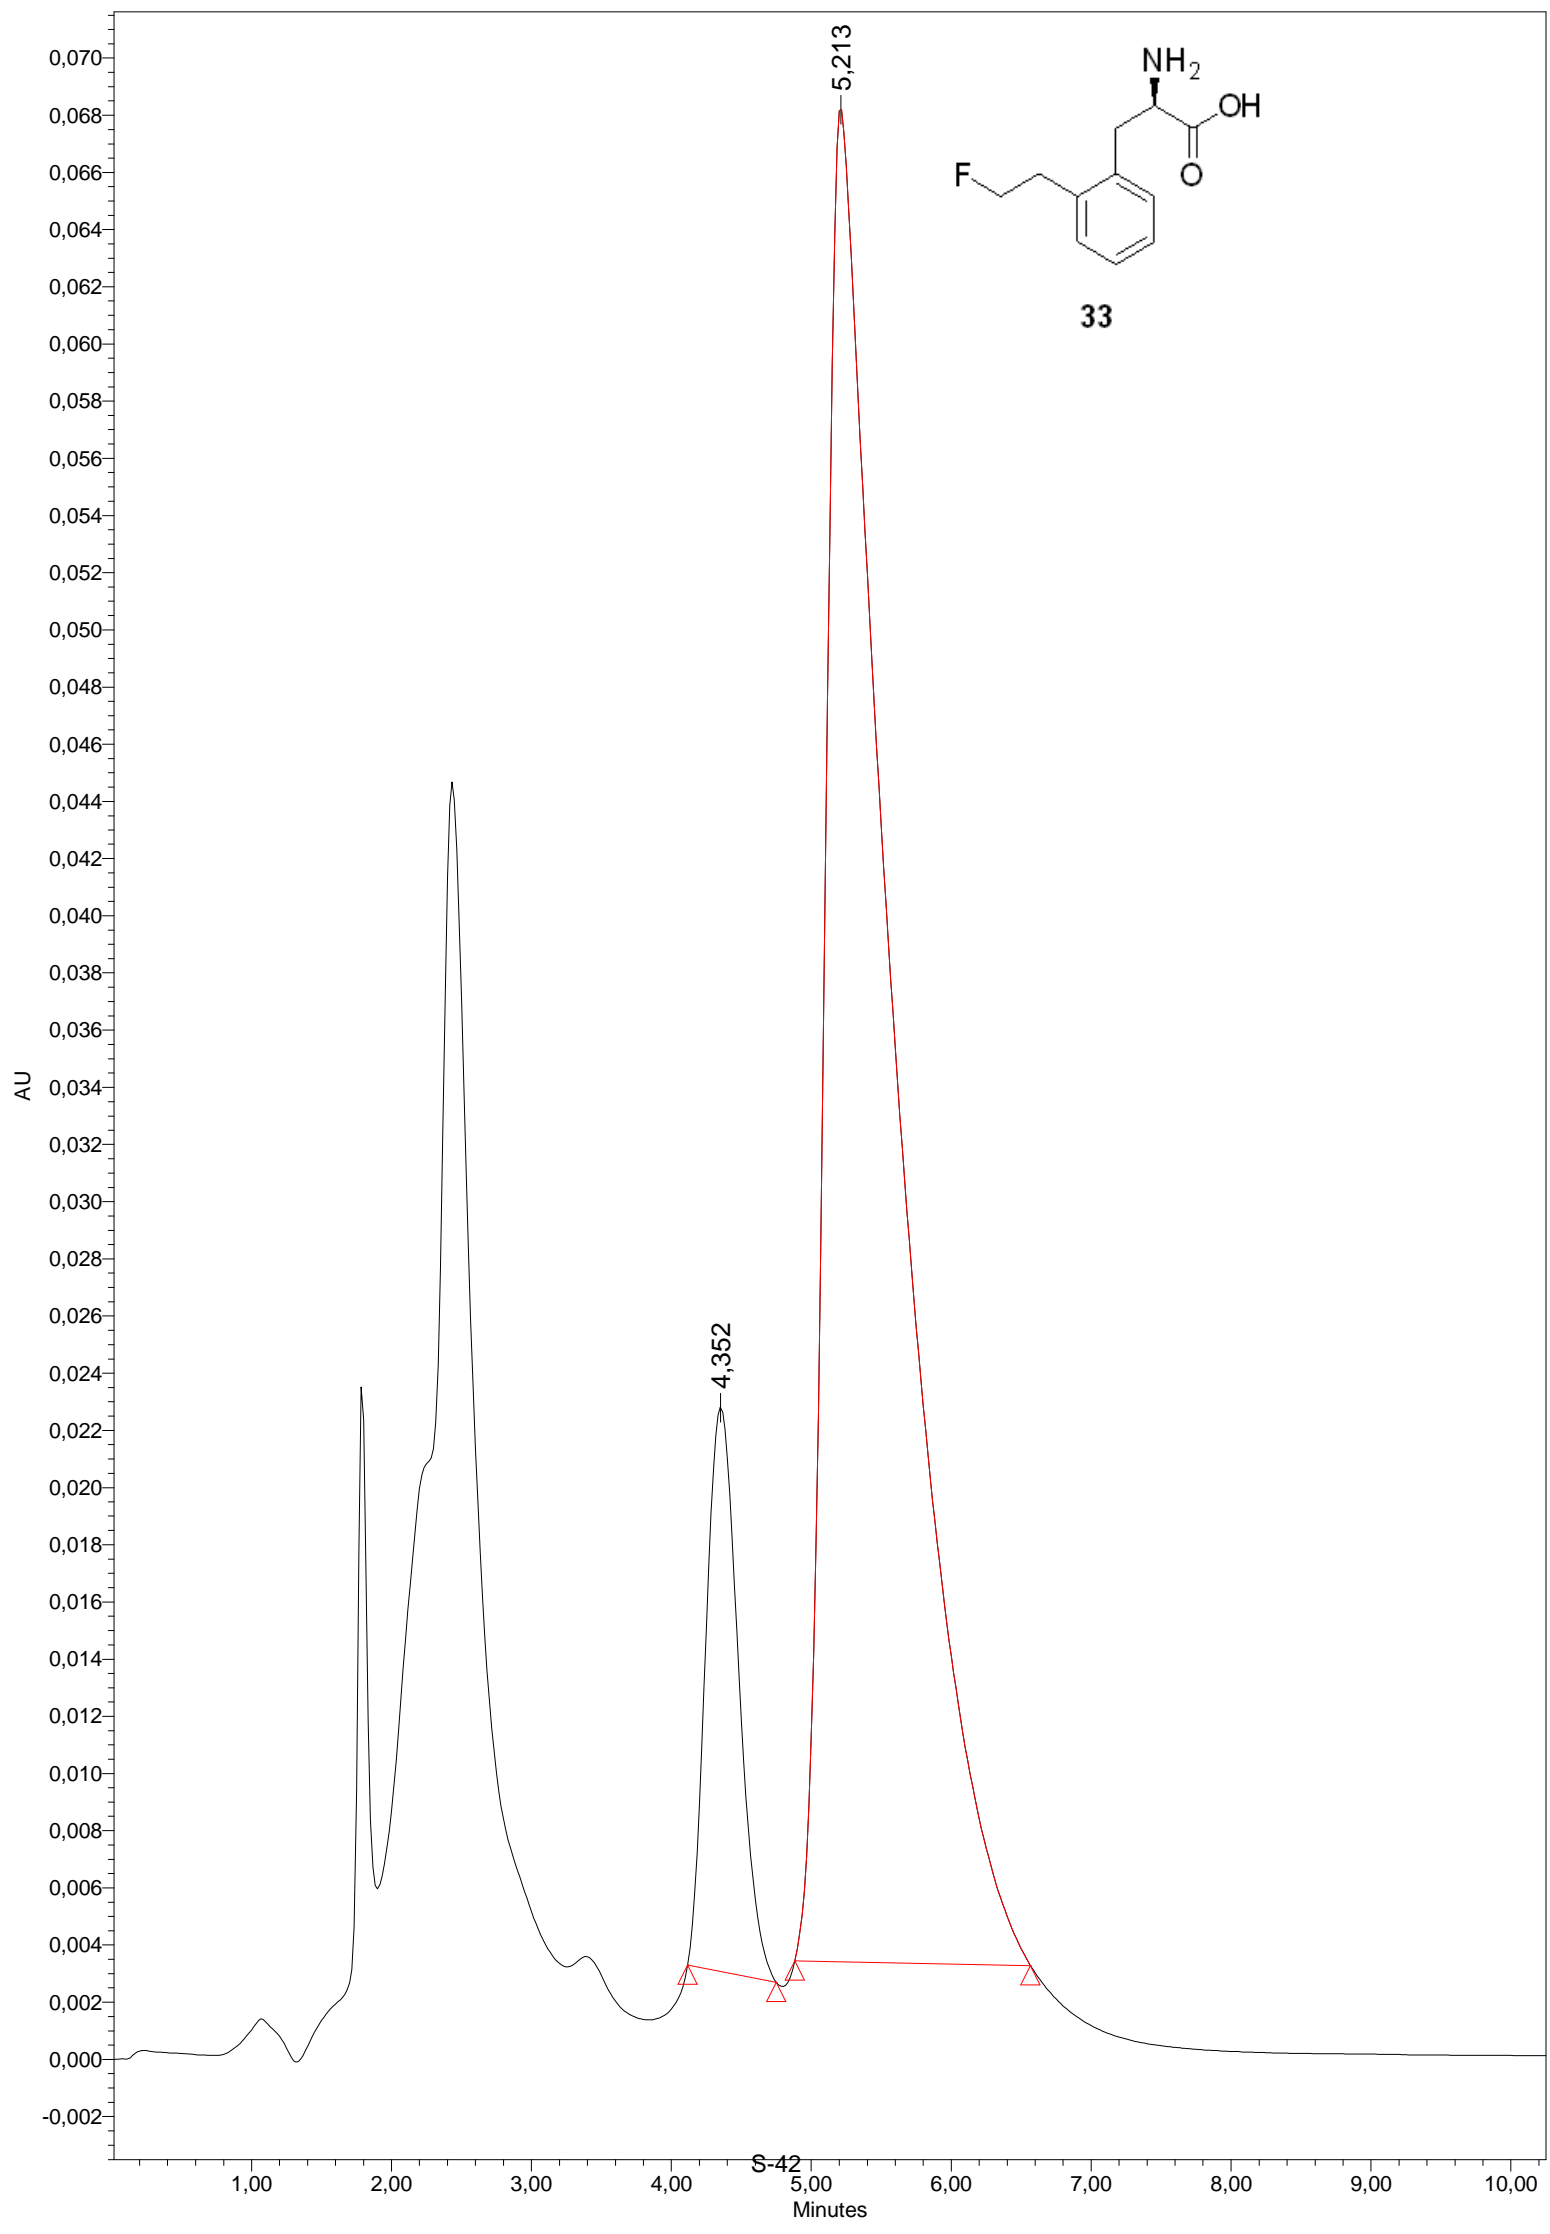

| Name | Retention Time (min) | Area ( $\mu\text{V}\cdot\text{sec}$ ) | % Area | Height ( $\mu\text{V}$ ) | Int Type | Amount | Units | Peak Type | Peak Codes |
|------|----------------------|---------------------------------------|--------|--------------------------|----------|--------|-------|-----------|------------|
| 1    | 4,352                | 319629                                | 12,38  | 19742                    | bb       |        |       | Unknown   |            |
| 2    | 5,213                | 2262906                               | 87,62  | 64814                    | bb       |        |       | Unknown   |            |

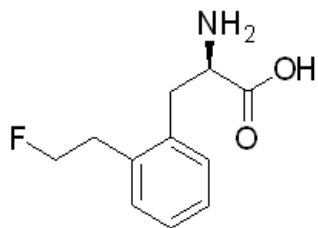

33

## Radiosynthesis of [ $^{18}\text{F}$ ]-32 (2-[ $^{18}\text{F}$ ]-FELP): Flow scheme

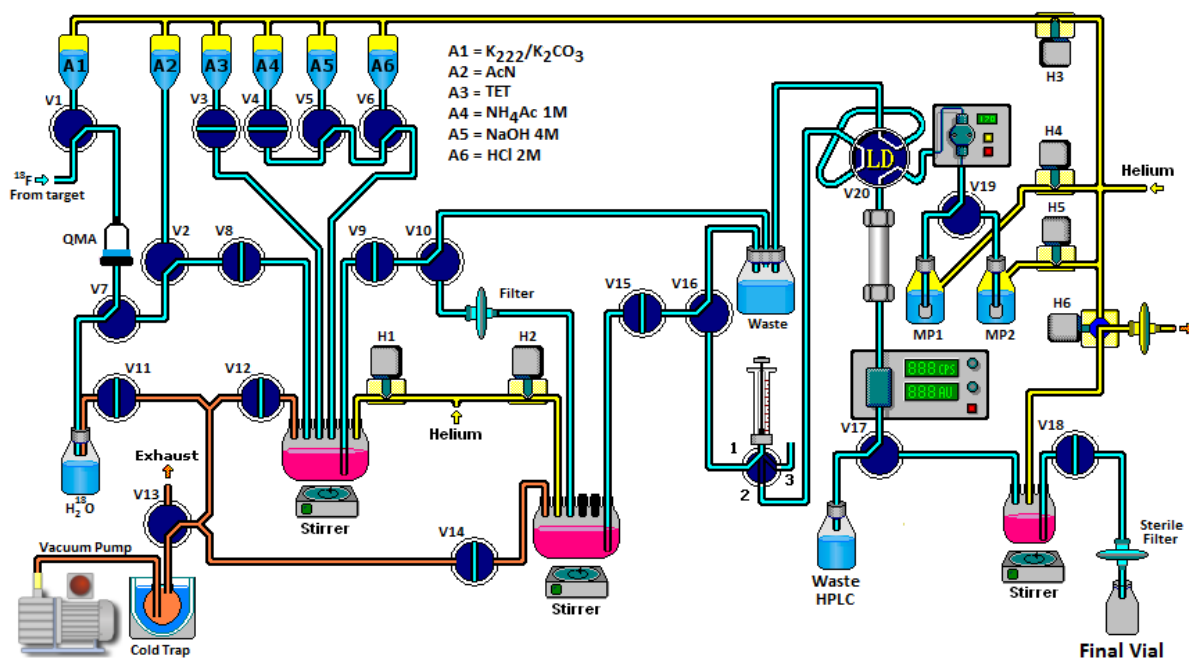

**Supplementary Figure 1:** Flow scheme of custom Synthra RN plus module (Synthra GmbH, Hamburg, Germany).

## Radiogram of [ $^{18}\text{F}$ ]-**32** (2-[ $^{18}\text{F}$ ]-FELP)

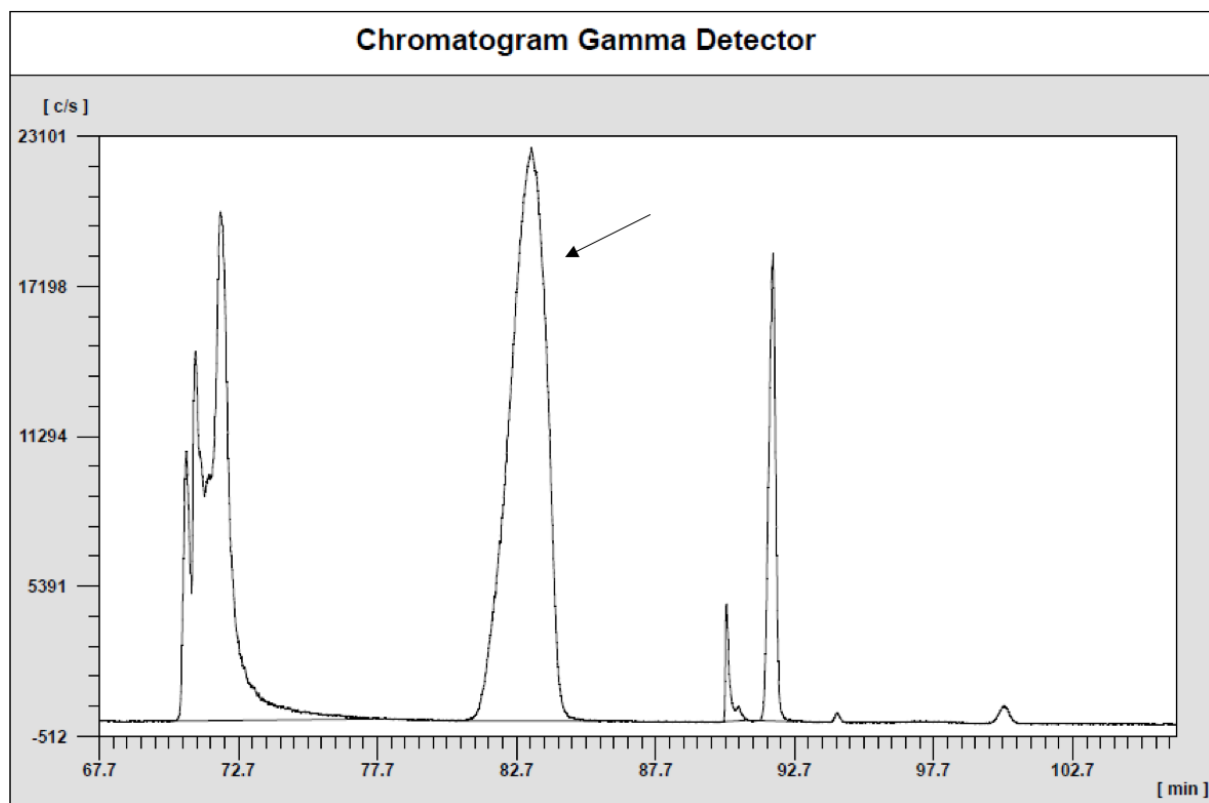

**Supplementary Figure 2:** Radiogram of radiosynthesized 2-[ $^{18}\text{F}$ ]FELP. The arrow indicates the 2-[ $^{18}\text{F}$ ]FELP peak.

## UV Chromatogram of $[^{18}\text{F}]\text{-32}$ (2- $[^{18}\text{F}]\text{-FELP}$ )

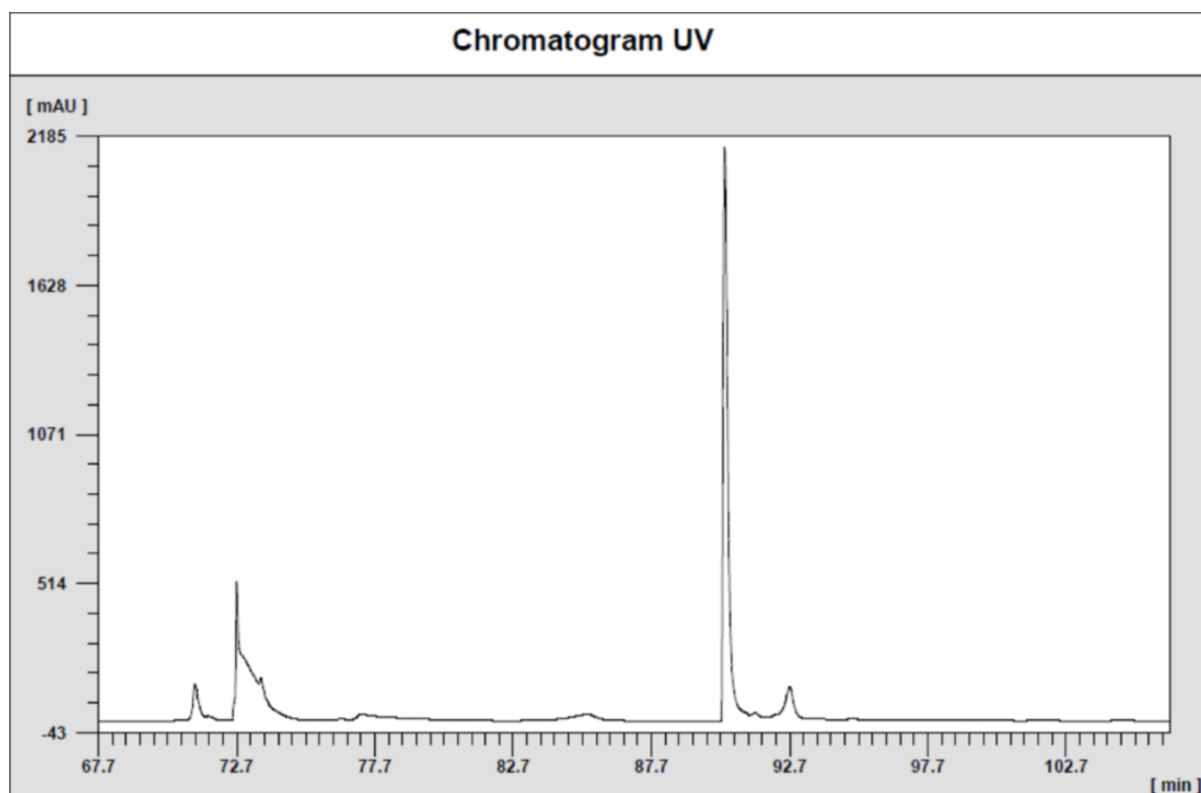

Supplementary Figure 3: UV chromatogram (254 nm) of radiosynthesized 2- $[^{18}\text{F}]\text{FELP}$ .

## Chiral purity analysis of compound [<sup>18</sup>F]-**32** (2-[<sup>18</sup>F]-FELP)

Chromatographic conditions for 2-[<sup>18</sup>F]-**32**:

Astec® Chirobiotic-T column, 125 x 4.6 mm, particle size 5 µm. Column temperature was regulated at ambient temperature. The chromatographic run was performed isocratically with a mixture of EtOH/water (8/2) at a flow rate of 1 mL/min.

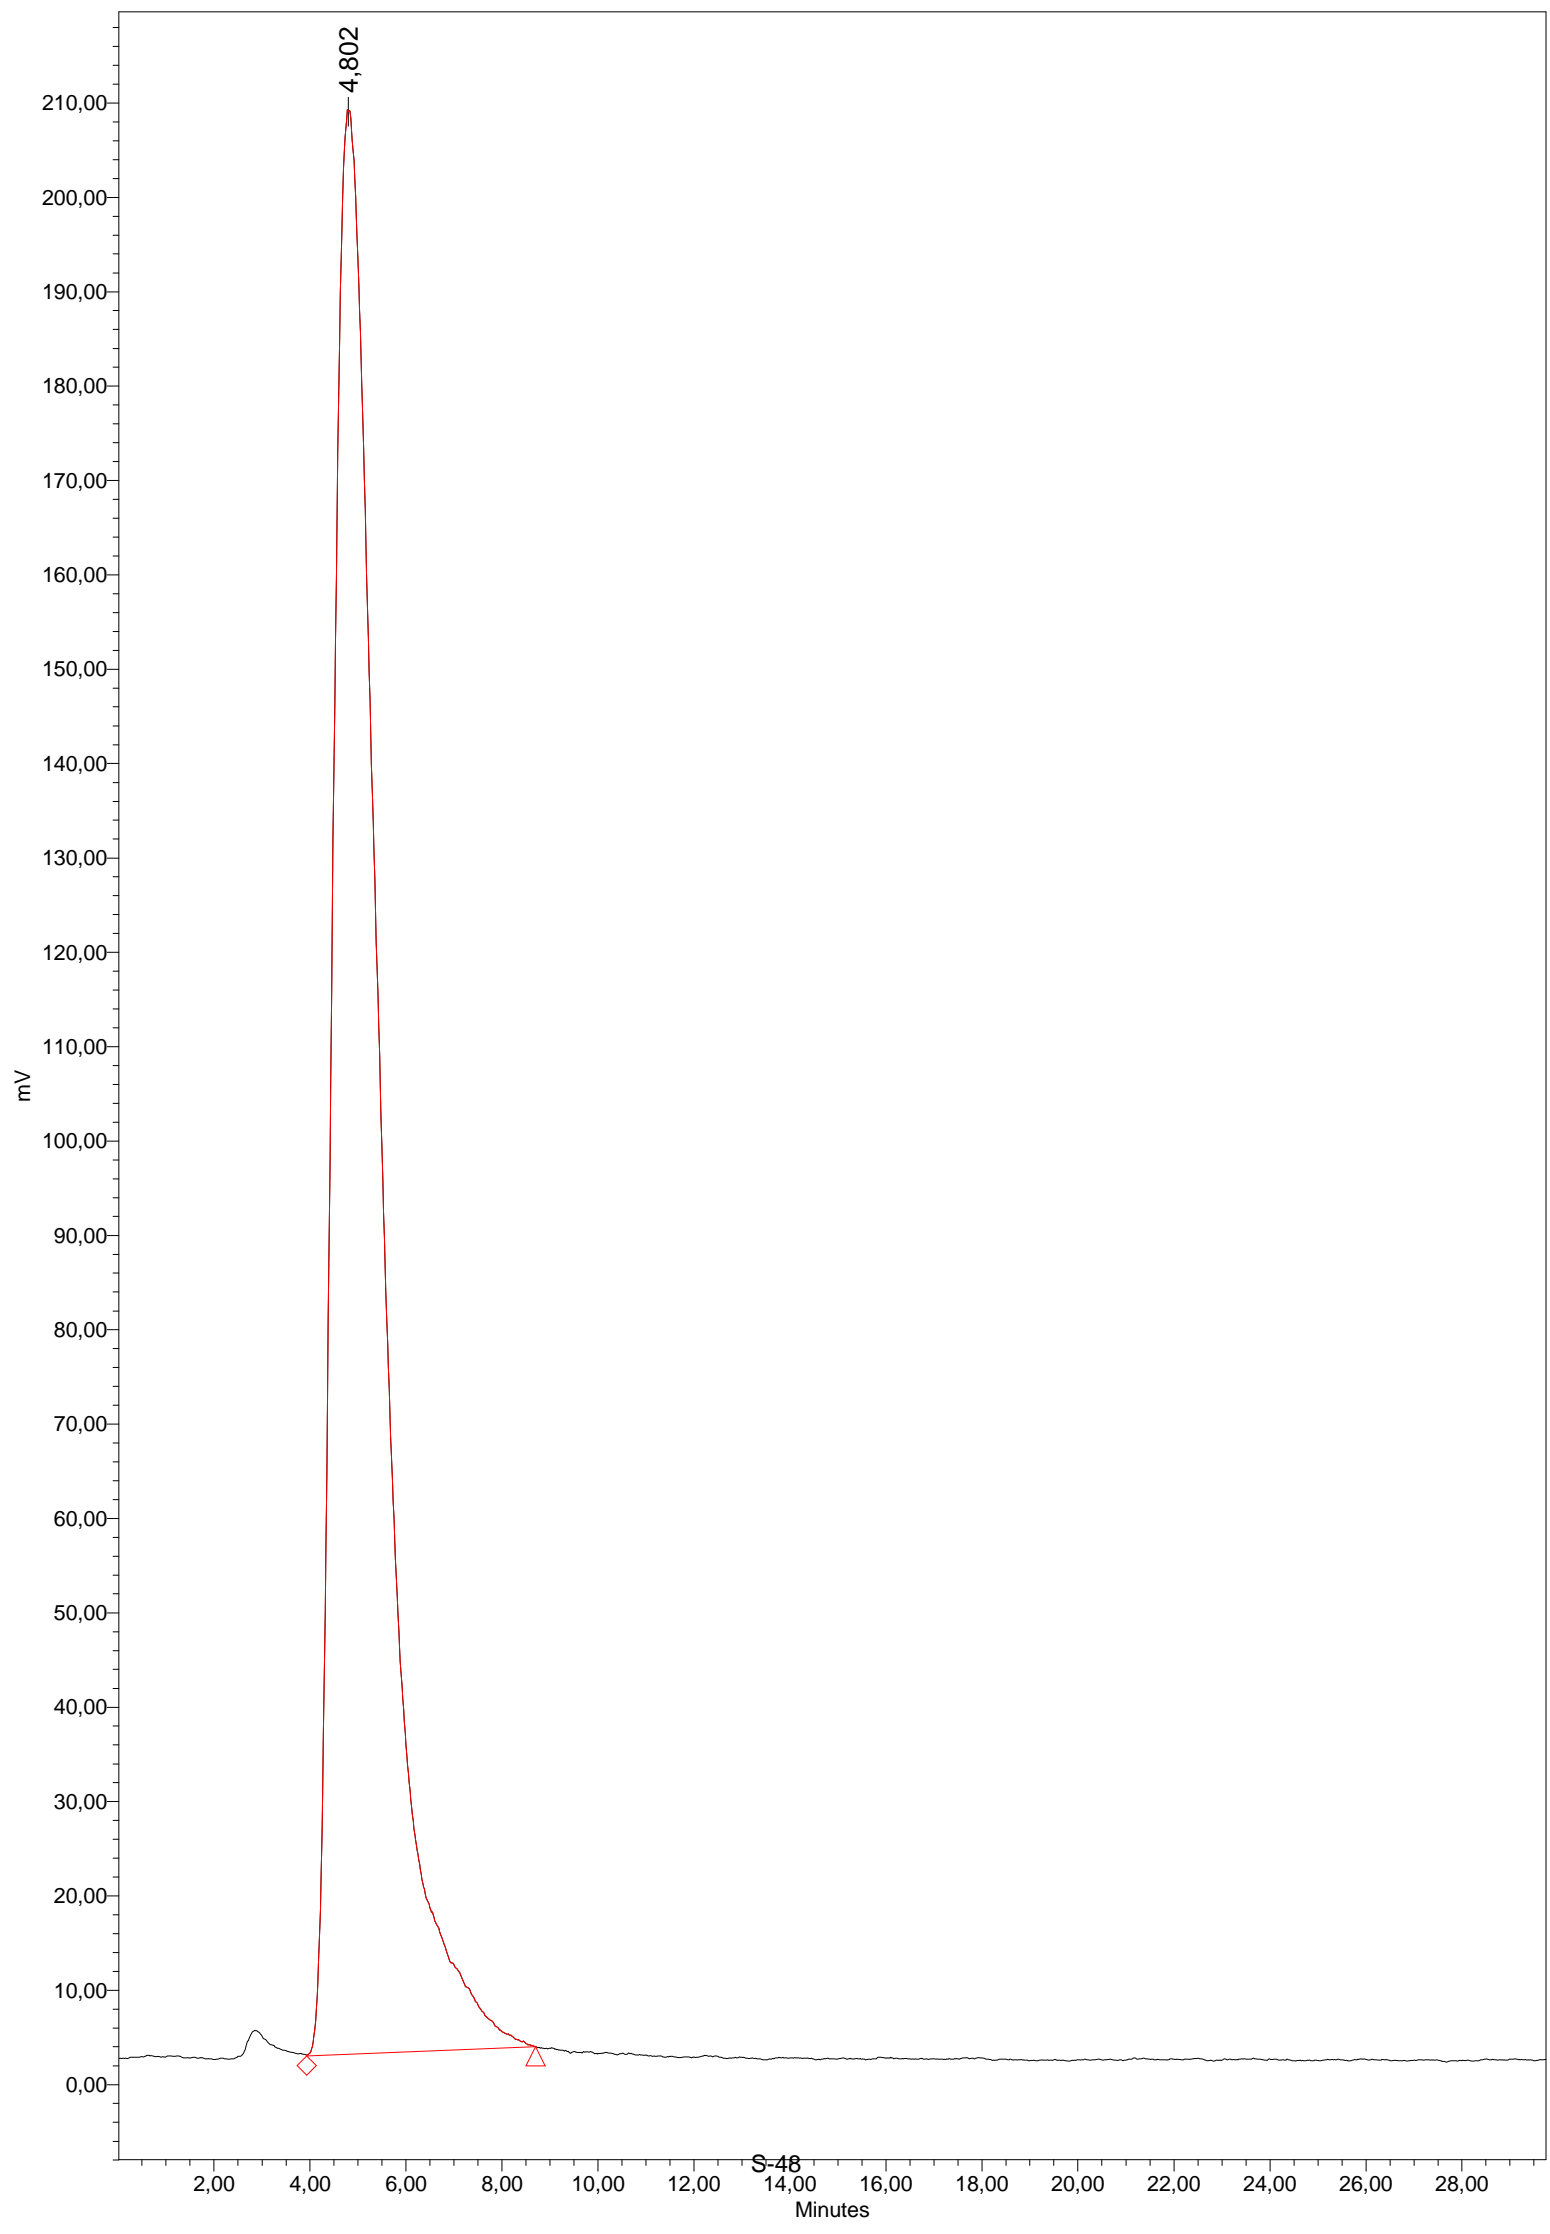



## Flow cytometry

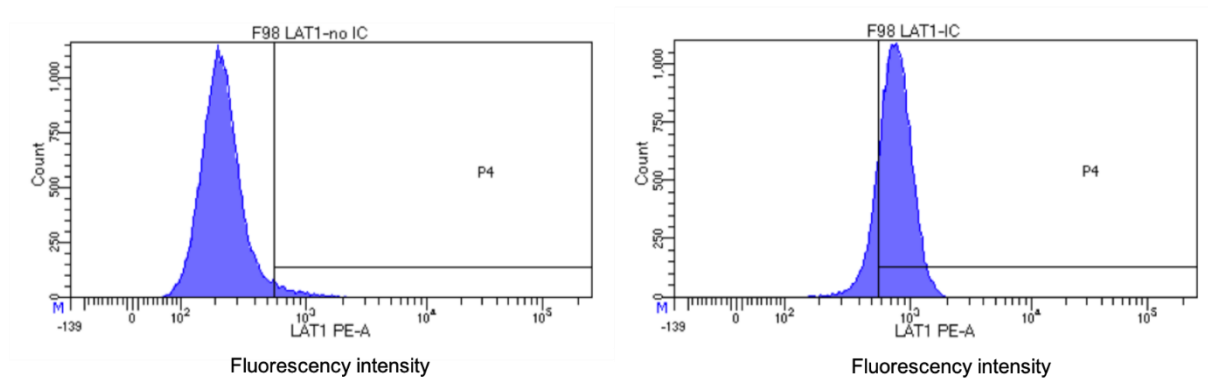

**Supplementary Figure 4:** Flow cytometry: LAT-1 expression of F98 cells. Left histogram represents surface staining (negative control). Right histogram represents intracellular staining.

## Michaelis-Menten plots

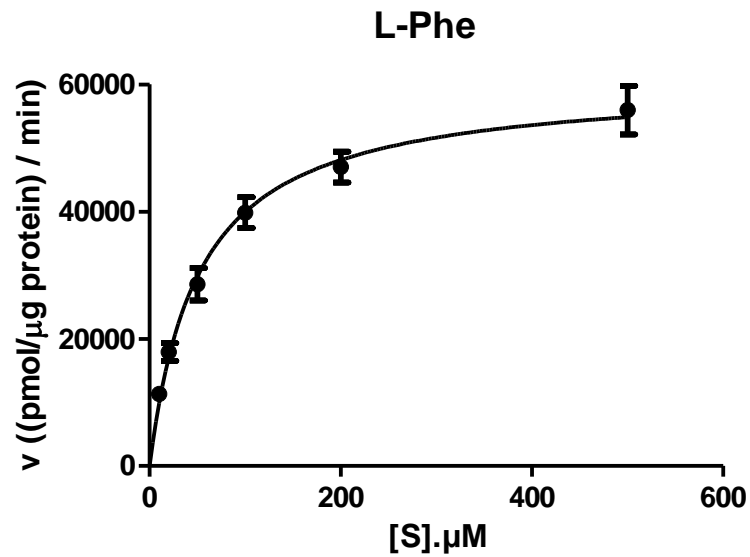

**Supplementary Figure 5:** Michaelis-Menten plot of [<sup>3</sup>H]-L-Phe uptake.

Incubation time = 1 min. ( $n=6$ )  $K_m = 51.53 \pm 7.80 \mu\text{M}$

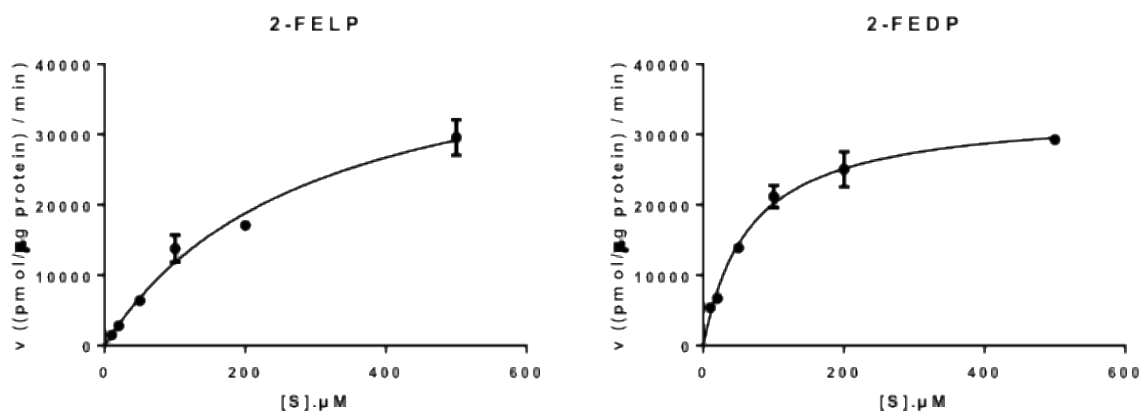

**Supplementary Figure 6:** Michaelis-Menten plot of [<sup>3</sup>H]-L-Phe uptake in the presence of **2-FELP (32)**

(left) or **2-FEDP (33)** (right). Incubation time = 1 min. ( $n=6$ )

$K_i$  **2-FELP (32)** =  $16.09 \pm 3.74 \mu\text{M}$ .  $K_i$  **2-FEDP (33)** =  $359.4 \pm 47.1 \mu\text{M}$ .

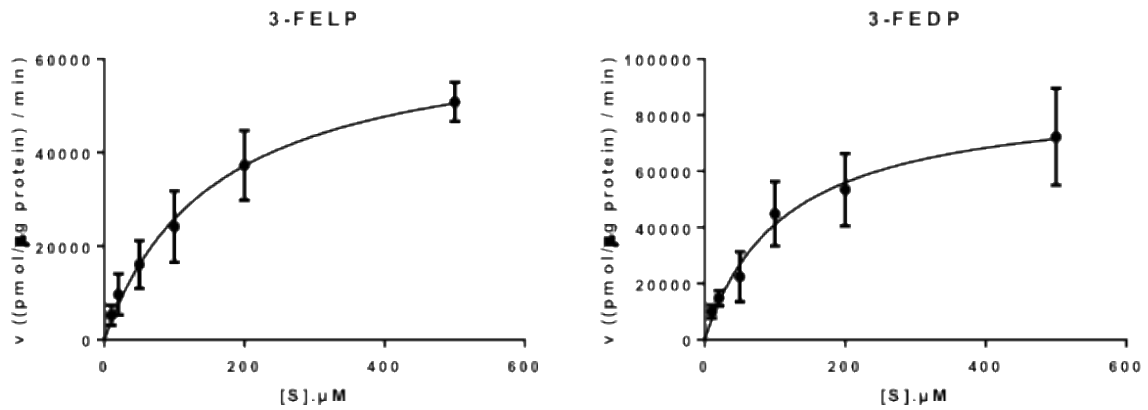

**Supplementary Figure 7:** Michaelis-Menten plot of [<sup>3</sup>H]-L-Phe uptake in the presence of **3-FELP (17)** (left) or **3-FEDP (18)** (right). Incubation time = 1 min. (*n*=6)

$K_i$  **3-FELP (17)** =  $48.95 \pm 4.92 \mu\text{M}$ .  $K_i$  **3-FEDP (18)** =  $83.75 \pm 28.1 \mu\text{M}$

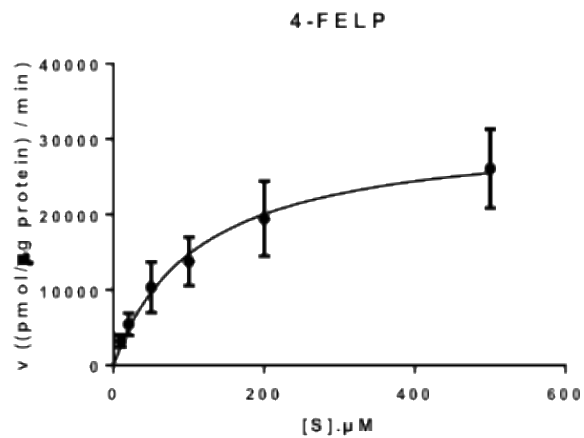

**Supplementary Figure 8:** Michaelis-Menten plot of [<sup>3</sup>H]-L-Phe uptake in the presence of **4-FELP (15)**.

Incubation time = 1 min. (*n*=6)  $K_i$  **4-FELP (15)** =  $85.55 \pm 4.40 \mu\text{M}$ .

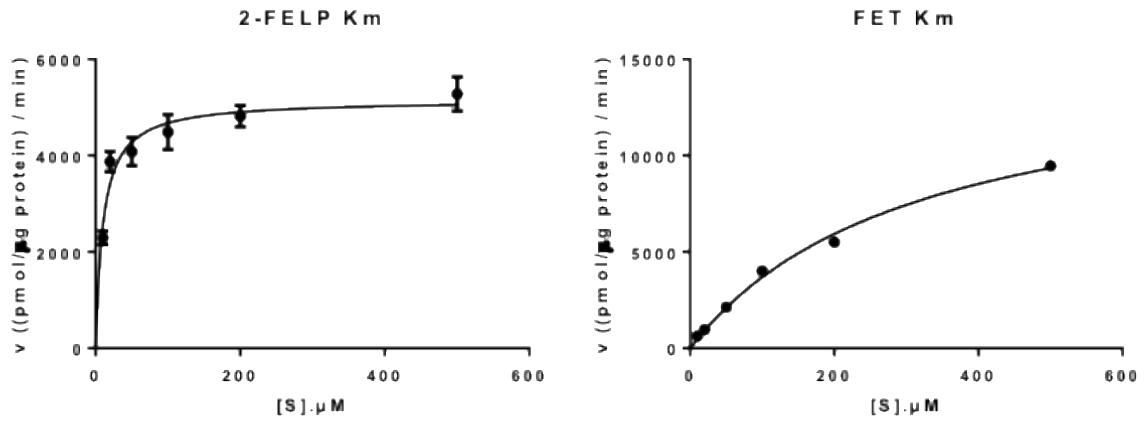

**Supplementary Figure 9:** Michaelis-Menten plot 2- $[^{18}\text{F}]$ FELP (**32**) (left) and  $[^{18}\text{F}]$ FET (right) uptake.

Incubation time = 1 min. ( $n = 6$ )

$K_m$  2- $[^{18}\text{F}]$ FELP (**32**) =  $12.54 \pm 3.82$  µM.  $K_m$   $[^{18}\text{F}]$ FET =  $312.9 \pm 25.6$  µM

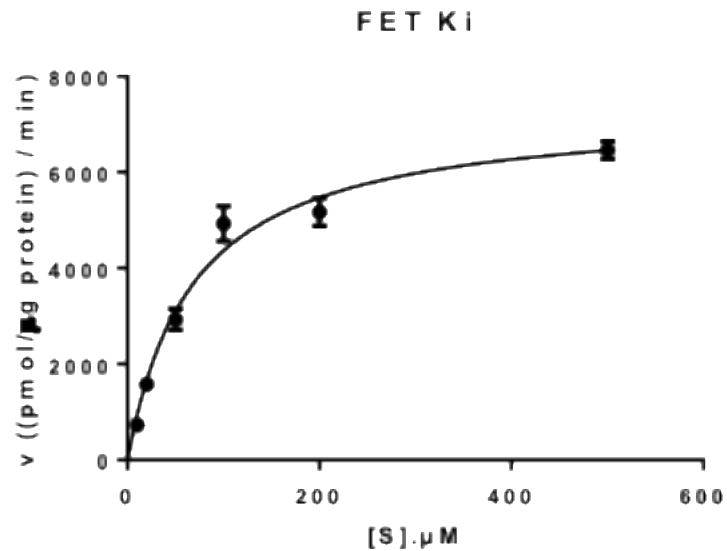

**Supplementary Figure 10:** Michaelis-Menten plot of  $[^3\text{H}]$ -L-Phe uptake in the presence of FET.

Incubation time = 1 min. ( $n = 6$ )  $K_i$  FET =  $307.2 \pm 4.29$  µM
